# Supplementary material for: Pollen-mediated gene flow from transgenic perennial creeping bentgrass and hybridization at the landscape level
Source: PubMed Central journal article supplement (PMC5336273; doi:10.1371/journal.pone.0173308), 2017-03-03
Supplement: pone.0173308.s001.pdf [file pone.0173308.s001.pdf]

>ITS.332\_1-C1 7638\_G04\_010-G05\_018rc.complete  
GGAAGTAAAAGTCGTAACAAGGTTTCCGTAGGTGAACCTGCGGAAGGATCATTGTTCGTGA  
CCCTGACCAAATAGACCGTGCACGCGTCATCCAGCCTGCCGGCGGCGGCACCGTTTCGTG  
GCTCGGCCAAGTCCTCGACAACCTCCTCTCCTCGGAGTGGGGGCTCGGGGTAAAAGAACC  
CACGACGCCTAAGGCGTCAAGGAACACTGTGCCTAGCCGGGGACGCGGACGGCTTGCTG  
GCCGCCCCCGTGCTGCAATGCTATTTAATCCACACGACTCTCGGCAACGGATATCTCGG  
CTCTCGCATCGATGAAGAACGTAGCGAAATGCGATACCTGGTGTGAATTGCAGAATCCCG  
CGAACCATCGAGTCTTTGAACGCAAGTTGCGCCCCGAGGCCATTCGGCTGAGGGCACGCCT  
GCCTGGGCGTCACGCAAAACACGCTCCCACACCCTCATCGGGTAGCGGGACGCGGCATGT  
GGTCCCCCGTAGCGCAAGCTGCGGTGGGCCGAAGATATGGCTGCCGGCGTATCGTGCCGG  
ACACAGCGCGTGGTGGGCGACCTCGCTTTACTTACCGCAGTGCATCCGGGGCGTAGCCGA  
CGTGATGGCCTCTAAGGACCCTATGAACGGTGCACGACG

>ITS.332\_1-C2 7638\_H04\_009-H05\_017rc.complete  
GGAAGTAAAAGTCGTAACAAGGTTTCCGTAGGTGAACCTGCGGAAGGATCATTGTTCGTGA  
CCCTGACCAAATAGACCGTGCACGCGTCATCCAGCCTGCCGGCGGCGGCACCGTTTCGTG  
GCTCGGCCAAGTCCTCGACAACCTCCTCTCCTCGGAGTGGGGGCTCGGGGTAAAAGAACC  
CACGACGCCTAAGGCGTCAAGGAACACTGTGCCTAGCTCGGGGACGCGGACGGCTTGCTG  
GCCGCCCCCTCGTGCTGCAATGCTATTTAATCCACACGACTCTCGGCAACGGATATCTCGG  
CTCTCGCATCGATGAAGAACGTAGCGAAATGCGATACCTGGTGTGAATTGCAGAATCCCG  
CGAACCATCGAGTCTTTGAACGCAAGTTGCGCCCCGAGGCCATTCGGCTGAGGGCACGCCT  
GCCTGGGCGTCACGCAAAACACGCTCCCACACCCTCATTGGGTAGCGGGACGCGGCATGT  
GGTCCCCCGTAGCGCAAGCTGCGGTGGGCCGAAGATATGGCTGCCGGCGTATCGTGCCGG  
ACACAGCGCGTGGTGGGCGACCTCGCTTTACTTACCGCAGTGCATCCGGGGCGTAGCCGA  
CGTGATGGCCTCTAAGGACCCTATGAACGGTGCACGACG

>ITS.332\_1-C3 7638\_A05\_024-A06\_024rc.complete  
GGAAGTAAAAGTCGTAACAAGGTTTCCGTAGGTGAACCTGCGGAAGGATCATTGTTCGTGA  
CCCTGACCAAATAGACCGTGCACGCGTCATCCAGCCTGCCGGCGGCGGCACCGTTTCGTG  
GCTCGGCCAAGTCCTCGACAACCTCCTCTCCTCGGAGTGGGGGCTCGGGGTAAAAGAACC  
CACGACGCCTAAGGCGTCAAGGAACACTGTGCCTAGCCGGGGACGCGGACGGCTTGCTG  
GCCGCCCCCCCCGTGCTGCAATGCTATTTAATCCACACGACTCTCGGCAACGGATATCTCG  
GCTCTCGCATCGATGAAGAACGTAGCGAAATGCGATACCTGGTGTGAATTGCAGAATCCC  
GCGAACCATCGAGTCTTTGAACGCAAGTTGCGCCCCGAGGCCATTCGGCTGAGGGCACGCC  
TGCTGGGCGTCACGCAAAACACGCTCCCACACCCTCATCGGGTAGCGGGACGCGGCATG  
TGGTCCCCCGTAGCGCAAGCTGCGGTGGGCCGAAGATATGGCTGCCGGCGTATCGTGCCGG  
GACACAGCGCGTGGTGGGCGACCTCGCTTTACTTACCGCAGTGCATCCGGGGCGTAGCCG  
ACGTGATGGCCTCTAAGGACCCTATGAACGGTGCACGACG

>ITS.332\_1-C4 7638\_B05\_023-B06\_023rc.complete  
GGAAGTAAAAGTCGTAACAAGGTTTCCGTAGGTGAACCTGCGGAAGGATCATTGTTCGTGA  
CCCTGACCAAATAGACCGTGCACGCGTCATCCAGCCTGCCGGCGGCGGCACCGTTTCGTG  
GCTCGGCCAAGTCCTCGACAACCTCCTCTCCTCGGAGTGGGGGCTCGGGGTAAAAGAACC  
CACGACGCCTAAGGCGTCAAGGAACACTGTGCCTAGCCGGGGACGCGGACGGCTTGCTG  
GCCGCCCCCCCCGTGCTGCAATGCTATTTAATCCACACGACTCTCGGCAACGGATATCTCGG  
CTCTCGCATCGATGAAGAACGTAGCGAAATGCGATACCTGGTGTGAATTGCAGAATCCCG  
CGAACCATCGAGTCTTTGAACGCAAGTTGCGCCCCGAGGCCATTCGGCTGAGGGCACGCCT  
GCCTGGGCGTCACGCAAAACACGCTCCCACACCCTCATCGGGTAGCGGGACGCGGCATGT  
GGTCCCCCGTAGCGCAAGCTGCGGTGGGCCGAAGATATGGCTGCCGGCGTATCGTGCCGG  
ACACAGCGCGTGGTGGGCGACCTCGCTTTACTTACCGCAGTGCATCCGGGGCGTAGCCGA  
CGTGATGGCCTCTAAGGACCCTATGAACGGTGCACGACG

>ITS.332\_1-C5 7638\_C06\_022-C05\_022rc.complete  
GGAAGTAAAAGTCGTAACAAGGTTTCCGTAGGTGAACCTGCGGAAGGATCATTGTTCGTGA  
CCCTGACCAAATAGACCGTGCACGCGTCATCCAGCCTGCCGGCGGCGGCACCGTTTCGTG  
GCTCGGCCAAGTCCTCGACAACCTCCTCTCCTCGGAGTGGGGGCTCGGGGTAAAAGAACC  
CACGACGCCTAAGGCGTCAAGGAACACTGTGCCTAGCCGGGGACGCGGACGGCTTGCTG  
GCCGCCCCCCCCGTGCTGCAATGCTATTTAATCCACACGACTCTCGGCAACGGATATCTCGG  
CTCTCGCATCGATGAAGAACGTAGCGAAATGCGATACCTGGTGTGAATTGCAGAATCCCG  
CGAACCATCGAGTCTTTGAACGCAAGTTGCGCCCCGAGGCCATTCGGCTGAGGGCACGCCT  
GCCTGGGCGTCACGCAAAACACGCTCCCACACCCTCATCGGGTAGCGGGACGCGGCATGT  
GGTCCCCCGTAGCGCAAGCTGCGGTGGGCCGAAGATATGGCTGCCGGCGTATCGTGCCGG  
ACACAGCGCGTGGTGGGCGACCTCGCTTTACTTACCGCAGTGCATCCGGGGCGTAGCCGA  
CGTGATGGCCTCTAAGGACCCTATGAACGGTGCACGACG

CTCTCGCATCGATGAAGAACGTAGCGAAATGCGATACCTGGTGTGAATTGCAGAATCCCG  
CGAACCATCGAGTCTTTGAACGCAAGTTGCGCCCCGAGGCCATTCGGTTGAGGGCACGCCT  
GCCTGGGCGTCACGCAAAACACGCTCCCACACCCTCATCGGGTAGCGGGACGCGGCATGT  
GGTCCCCCGTAGCGCAAGCTGCGGTGGGCCGAAGATATGGCTGCCGGCGTATCGTGCCGG  
ACACAGCGCGTGGTGGGCGACCTCGCTTTACTTACCGCAGTGCATCCGGGGCGTAGCCGA  
CGTGATGGCCTCTAAGGACCCTATGAACGGTGCACGACG  
>ITS.332\_1-C6 7638\_E05\_020-D05\_021rc.complete  
GGAAGTAAAAGTTCGTAACAAGGTTTCCGTAGGTGAACCTGCGGAAGGATCATTGTCTGTGA  
CCCTGACCAAATAGACCGTGCACGCGTCATCCAGCCTGCCGGCGGGCACCCTTCGTC  
GCTCGGCCAAGTCTCGACAACCTCCTCTCCTCGGAGTGGGGGCTCGGGGTAAAAGAACC  
CACGACGCCTAAGGCGTCAAGGAACACTGTGCCTAGCCGGGGACGCGGACGGCTTGCTG  
GCCGCCCCCGTGCTGCAATGCTATTTAATCCACACGACTCTCGGCAACGGATATCTCGG  
CTCTCGCATCGATGAAGAACGTAGCGAAATGCGATACCTGGTGTGAATTGCAGAATCCCG  
CGAACCATCGAGTCTTTGAACGCAAGTTGCGCCCCGAGGCCATTCGGTTGAGGGCACGCCT  
GCCTGGGCGTCACGCAAAACACGCTCCCACACCCTCATCGGGTAGCGGGACGCGGCATGT  
GGTCCCCCGTAGCGCAAGCTGCGGTGGGCCGAAGATATGGCTGCCGGCGTATCGTGCCGG  
ACACAGCGCGTGGTGGGCGACCTCGCTTTACTTACCGCAGTGCATCCGGGGCGTAGCCGA  
CGTGATGGCCTCTAAGGACCCTTTGAACGGTGCACGACG  
>ITS.332\_1-C7 7638\_E06\_020-E05\_020rc.complete  
GGAAGTAAAAGTTCGTAACAAGGTTTCCGTAGGTGAACCTGCGGAAGGATCATTGTCTGTGA  
CCCTGACCAAATAGACCGTGCACGCGTCATCCAGCCTGCCGGCGGGCACCCTTCGTC  
GCTCGGCCAAGTCTCGACAACCTCCTCTCCTCGGAGTGGGGGCTCGGGGTAAAAGAACC  
CACGACGCCTAAGGCGTCAAGGAACACTGTGCCTAGCCGGGGACGCGGACGGCTTGCTG  
GCCGCCCCCGTGCTGCAATGCTATTTAATCCACACGACTCTCGGCAACGGATATCTCGG  
CTCTCGCATCGATGAAGAACGTAGCGAAATGCGATACCTGGTGTGAATTGCAGAATCCCG  
CGAACCATCGAGTCTTTGAACGCAAGTTGCGCCCCGAGGCCATTCGGTTGAGGGCACGCCT  
GCCTGGGCGTCACGCAAAACACGCTCCCACACCCTCATCGGGTAGCGGGACGCGGCATGT  
GGTCCCCCGTAGCGCAAGCTGCGGTGGGCCGAAGATATGGCTGCCGGCGTATCGTGCCGG  
ACACAGCGCGTGGTGGGCGACCTCGCTTTACTTACCGCAGTGCATCCGGGGCGTAGCCGA  
CGTGATGGCCTCTAAGGACCCTTTGAACGGTGCACGACG  
>ITS.332\_1-C8 7638\_F06\_019-F05\_019rc.complete  
GGAAGTAAAAGTTCGTAACAAGGTTTCCGTAGGTGAACCTGCGGAAGGATCATTGTCTGTGA  
CCCTGACCAAATAGACCGTGCACGCGTCATCCAGCCTGCCGGCGGGCACCCTTCGTC  
GCTCGGCCAAGTCTCGACAACCTCCTCTCCTCGGAGTGGGGGCTCGGGGTAAAAGAACC  
CACGACGCCTAAGGCGTCAAGGAACACTGTGCCTAGCCGGGGACGCGGACGGCTTGCTG  
GCCGCCCCCGTGCTGCAATGCTATTTAATCCACACGACTCTCGGCAACGGATATCTCGG  
CTCTCGCATCGATGAAGAACGTAGCGAAATGCGATACCTGGTGTGAATTGCAGAATCCCG  
CGAACCATCGAGTCTTTGAACGCAAGTTGCGCCCCGAGGCCATTCGGTTGAGGGCACGCCT  
GCCTGGGCGTCACGCAAAACACGCTCCCACACCCTCATCGGGTAGCGGGACGCGGCATGT  
GGTCCCCCGTAGCGCAAGCTGCGGTGGGCCGAAGATATGGCTGCCGGCGTATCGTGCCGG  
ACACAGCGCGTGGTGGGCGACCTCGCTTTACTTACCGCAGTGCATCCGGGGCGTAGCCGA  
CGTGATGGCCTCTAAGGACCCTTTGAACGGTGCACGACG  
>ITS.404\_1-C1 7638\_G02\_002-G03\_010rc.complete  
GGAAGTAAAAGTTCGTAACAAGGTTTCCGTAGGTGAACCTGCGGAAGGATCATTGTCTGTGA  
CCCTGACCAAATAGACCGCGCACGCGTAATCCAGCCTGCCGGCGATGGCATCGTCCGTC  
GCTCGGCCAAGTCTCGACAACCTCATCTCCTCGGAGTGGGGCTCGGGGTAAAAGAACC  
ACGACGCCTAAGGCGTCAAGGAACACTGTGCCTAGCCGGGGACGCGGACGGCTTGCTGG  
CCGCCCCCGTGCTGCAATGCTATTTAATCCACACGACTCTCGGCAACGGATATCTCGGC  
TCTCGCATCGATGAAGAACGTAGCGAAATGCGATACCTGGTGTGAATTGCAGAATCCCGC  
GAACCATCGAGTCTTTGAACGCAAGTTGCGCCCCGAGGCCATTCGGCTGAGGGCACGCCTG  
CTGGGCGTCACGCAAAACACGCTCCCACCCCTCATCGGGTAGCGGGACGCGGCATGTG  
GTCCCCCGTAGCGCAAGCTGCGGTGGGCCGAAGATATGGCTGCCGGCGTATCGTGCCGG  
CACAGCGCGTGGTGGGCGACCTCGCTTTACTTACCGCAGTGCATCCGGGGCGTAGCTGAC  
GTGATGGCCTCTAAGGACCCTATGAACGGTGCACGACG

>ITS.404\_1-C2\_7638\_H03\_009-H02\_001rc.complete  
GGAAGTAAAAGTCGTAACAAGGTTTCCGTAGGTGAACCTGCGGAAGGATCATTGTCTGTGA  
CCCTGACCAAATAGACCGTGCACGCGTCATCCAGCCTGCCGGCGGCGGCACCGTTTCGTC  
GCTCGGCCAAGTCCTCGACAACCTCCTCTCCTCGGAGTGGGGGCTCGGGGTAAAAGAACC  
CACGACGCCTAAGGCGTCAAGGAACACTGTGCCTAGCCCGGGGACGCGGACGGCTTGCTG  
GCCGCCCCCGTGCTGCAATGCTATTTAATCCACACGACTCTCGGCAACGGATATCTCGG  
CTCTCGCATCGATGAAGAACGTAGCGAAATGCGATACCTGGTGTGAATTGCAGAATCCCG  
CGAACCATCGAGTCTTTGAACGCAAGTTGCGCCCCGAGGCCATTCGGCTGAGGGCAGCCT  
GCCTGGGCGTCACGCAAAACACGCTCCCACCCCTCATCGGGTAGCGGGACGCGGCATGT  
GGCCCCCGTAGCGCAAGCTGCGGTGGGCCGAAGATATGGCTGCCGGCGTATCGTGCCGG  
ACACAGCGCGTGGTGAGCGACCTCGCTTTACTTACCGCAGTGCATCCGGGGCGTAGCCGA  
CGTGATGGCCTCTAAGGACCCTATGAACGGTGCGCACGACG

>ITS.404\_1-C3\_7638\_A04\_016-A03\_016rc.complete  
GGAAGTAAAAGTCGTAACAAGGTTTCCGTAGGTGAACCTGCGGAAGGATCATTGTCTGTGA  
CCCTGACCAAATAGACCGCGCACACGTAATCCAGCCTGCCGGCGATGGCACCGTCCGTC  
GCTCGGCCAAGTCCTCGACAACCTCATCTCCTCGGAGTGGGGCTCGGGGTAAAAGAACC  
ACGACGCCTAAGGCGTCAAGGAACACTGTGCCTAGCCCGGGGACGCGGACGGCTTGCTGG  
CCGCCCCCGTGCTGCAATGCTATTTAATCCACACGACTCTCGGCAACGGATATCTCGGC  
TCTCGCATCGATGAAGAACGTAGCGAAATGCGATACCTGGTGTGAATTGCAGAATCCCGC  
GAACCATCGAGTCTTTGAACGCAAGTTGCGCCCCGAGGCCATTCGGCTGAGGGCAGCCTG  
CCTGGGCGTCACGCAAAACACGCTCCCACCCCTCATCGGGTAGCGGGACGCGGCATGTG  
GCCCCCCGTAGCGCAAGCTGCGGTGGGCCGAAGATATGGCTGCCGGCGTATCGTGCCGGA  
CACAGCGCGTGGTGAGCGACCTCGCTTTACTTACCGCAGTGCATCCGGGGCGTAGCCGAC  
GTGATGGCCTCCAAGGACCCTTTGAACGGTGCGCACGACG

>ITS.404\_1-C4\_7638\_B04\_015-B03\_015rc.complete  
GGAAGTAAAAGTCGTAACAAGGTTTCCGTAGGTGAACCTGCGGAAGGATCATTGTCTGTGA  
CCCTGACCAAATAGACCGTGCACGCGTCATCCAGCCTGCCGGCGGCGGCACCGTTTCGTC  
GCTCGGCCAAGTCCTCGACAACCTCCTCTCCTCGGAGTGGGGGCTCGGAGTAAAAGAACC  
CACGACGCCTAAGGCGTCAAGGAACACTGTGCCTAGCCCGGGGACGCGGACGGCTTGCTG  
GCCGCCCCCGTGCTGCAATGCTATTTAATCCACACGACTCTCGGCAACGGATATCTCGG  
CTCTCGCATCGATGAAGAACGTAGCGAAATGCGATACCTGGTGTGAATTGCAGAATCCCG  
CGAACCATCGAGTCTTTGAACGCAAGTTGCGCCCCGAGGCCATTCGGCTGAGGGCAGCCT  
GCCTGGGCGTCACGCGAAACACGCTCCCACCCCTCATCGGGTAGCGGGACGCGGCATGT  
GGTCCCCCGTAGCGCAAGCTGCGGTGGGCCGAAGATATGGCTGCCGGCGTATCGTGCCGG  
ACACAGCGCGTGGTGGGCGACCTCGCTTTACTTACCGCAGTGCATCCGGGGCGTAGCCGA  
CGTGATGGCCTCTAAGGACCCTTTGAACGGTGCGCACGACG

>ITS.404\_1-C5\_7638\_C04\_014-C03\_014rc.complete  
GGAAGTAAAAGTCGTAACAAGGTTTCCGTAGGTGAACCTGCGGAAGGATCATTGTCTGTGA  
CCCTGACCAAATAGACCGTGCACGCGTCATCCAGCCTGCCGGCGGCGGCACCGTTTCGTC  
GCTCGGCCAAGTCCTCGACAACCTCCTCTCCTCGGAGTGGGGGCTCGGGGTAAAAGAACC  
CACGACGCCTAAGGCGTCAAGGAACACTGTGCCTAGCCCGGGGACGCGGACGGCTTGCTG  
GCCGCCCCCGTGCTGCAATGCTATTTAATCCACACGACTCTCGGCAACGGATATCTCGG  
CTCTCGCATCGATGAAGAACGTAGCGAAATGCGATACCTGGTGTGAATTGCAGAATCCCG  
CGAACCATCGAGTCTTTGAACGCAAGTTGCGCCCCGAGGCCATTCGGCTGAGGGCAGCCT  
GCCTGGGCGTCACGCAAAACACGCTCCCACCCCTCATCGGGTAGCGGGACGCGGCATGT  
GGTCCCCCGTAGCGCAAGCTGCGGTGGGCCGAAGATATGGCTGCCGGCGTATCGTGCCGG  
ACACAGCGCGTGGTGGGCGACCTCGCTTTACTTACCGCAGTGCATCCGGGGCGTAGCCGA  
CGTGATGGCCTCTAAGGACCCTTTGAACGGTGCGCACGACG

>ITS.404\_1-C6\_7638\_D03\_013-D04\_013rc.complete  
GGAAGTAAAAGTCGTAACAAGGTTTCCGTAGGTGAACCTGCGGAAGGATCATTGTCTGTGA  
CCCTGACCAAATAGACCGCGCACGCGTAATCCAGCCTGCCGGCGATGGCACCGTCCGTC  
GCTCGGCCAAGTCCTCGACAACCTCATCTCCTCGGAGTGGGGCTCGGGGTAAAAGAACC  
ACGACGCCTAAGGCGTCAAGGAACACTGTGCCTAGCCCGGGGACGCGGACGGCTTGCTGG  
GGTCCCCCGTAGCGCAAGCTGCGGTGGGCCGAAGATATGGCTGCCGGCGTATCGTGCCGG  
ACACAGCGCGTGGTGGGCGACCTCGCTTTACTTACCGCAGTGCATCCGGGGCGTAGCCGA  
CGTGATGGCCTCTAAGGACCCTTTGAACGGTGCGCACGACG

CTCGCATCGATGAAGAACGTAGCGAAATGCGATACCTGGTGTGAATTGCAGAATCCCGCG  
AACCATCGAGTCTTTGAACGCAAGTTGCGCCCCGAGGCCATTTCGGCTGAGGGCACGCTGC  
CTGGGCGTCACGCAAAACACGCTCCCACCCCTCATCGGGTAGCGGGACGCGGCATGTGG  
CCCCCGTAGCGCAAGCTGCGGTGGGCCGAAGATATGGCTGCCGGCGTATCGTGCCGGAC  
ACAGCGCGTGGTGAGCGACCTCGCTTTACTTACCGCAGTGCATCCGGGGCGTAGCCGACG  
TGATGGCCTCTAAGGACCCTATGAACGGTGCACGACG  
>ITS.404\_1-C7 7638\_D04\_012-E03\_012rc.complete  
GGAAGTAAAAGTTCGTAACAAGGTTTCCGTAGGTGAACCTGCGGAAGGATCATTGTCTGTGA  
CCCTGACCAAATAGACCGCGCACACGTAATCCAGCCTGCCGGCGATGGCACCGTCCATT  
GCTCGGCCAAGTCTTCGACAACCTCATCTCCTCGGAGTGGGGCTCGGGGTAAAAGAACC  
ACGACGCCTAAGGCGTCAAGGAACACTGTGCCTAGCCCGGGGACGCGGACGGCTTGCTGG  
CCGCCCCCGTGTGCAATGCTATTTAATCCACACGACTCTCGGCAACGGATATCTCGGC  
TCTCGCATCGATGAAGAACGTAGCGAAATGCGATACCTGGTGTGAATTGCAGAATCCCGC  
GAACCATCGAGTCTTTGAACGCAAGTTACGCCTGAGGCCATTTCGGCTGAGGGCATGCCTG  
TCTAGGCGTCATGGAAAACACACTCCCACCCCTCATCAGGTAGCGGGACGCGGCATGTG  
GCCCCCGTAGCGCAAGCTGCGGTGGGCCAAAGATATGGCTGCCGGCGTATCGTGCCGGA  
CACAGTGCCTGGTGAGCAACCTCGCTTTACTTACCGCAGTGCATCCGGGGCGTAGCCGAC  
GTGATGGCCTCCAAGGACCCTTTGAACGGTGCACGACG  
>ITS.404\_1-C8\* 7638\_F03\_011-F04\_011rc.complete  
GGAAGTAAAAGTTCGTAACAAGGTTTCCGTAGGTGAACCTGCGGAAGGATCATTGTCTGTGA  
CCCTGACCAAATAGACCGCGCACGCGTAATCCAGCCTGCCGGCGATGGCATCGTCCGTC  
GCCCGGCCAAGTCTTCGACAACCTCATCTCCTCGGAGTGGGGCTCGGGGTAAAAGAACC  
ACGACGCCTAAGGCGTCAAGGAACACTGTGCCTAGCCCGGGGACGCGGACGGCTTGCTGG  
CCGCCCCCGTGTGCAATGCTATTTAATCCACACGACTCTCGGCAACGGATATCTCGGC  
TCTCGCATCGATGAAGAACGTAGCGAAATGCGATACCTGGTGTGAATTGCAGAATCCCGC  
GAACCATCGAGTCTTTGAACGCAAGTTGCGCCCCGAGGCCATTTCGGCTGAGGGCACGCCTG  
CCTGGGCGTCACGCAAAACACGCTCCCACCCCTCATCGGGTAGCGGGACGCGGCATGTG  
GCCCCCGTAGCGCAAGCTGCGGTGGGCCAAAGATATGGCTGCCGGCGTATCGTGCCGGA  
CACAGCGCGTGGTGAGCGACCTCGCTTTACTTACCGCAGTGCATCCGGGGCGTAGCCGAC  
GTGATGGCCTCCAAGGACCCTATGAACGGTGCACGACG  
>ITS.405-C1 7638\_H12\_041-F12\_043rc.complete  
GGAAGTAAAAGTTCGTAACAAGGTTTCCGTAGGTGAACCTGCGGAAGGATCATTGTCTGTGA  
CCCTGACCAAATAGACCGTGCACGCGTCATCCAGCCTGCCGGCGGCGGCACCGTTTCGTC  
GCTCGGCCAAGTCTTCGACAACCTCCTCCTCCTCGGAGTGGGGGCTCGGGGTAAAAGAACC  
CACGACGCCTAAGGCGTCAAGGAACACTGTGCCTAGCCCGGGGACGCGGACGGCTTGCTG  
GCCGCCCCCGTGTGCAATGCTATTTAATCCACACGACTCTCGGCAACGGATATCTCGG  
CTCTCGCATCGATGAAGAATGTAGCGAAATGCGATACCTGGTGTGAATTGCAGAATCCCG  
CGAACCATCGAGTCTTTGAACGCAAGTTGCGCCCCGAGGCCATTTCGGCTGAGGGCACGCCT  
GCCTGGGCGTCACGCAAAACACGCTCCCACACCCTCATCGGGTAGCGGGACGCGGCATGT  
GGTCCCCCGTAGCGCAAGCTGCGGTGGGCCGAAGATATGGCTGCCGGCGTATCGTGCCGG  
ACACAGCGCGTGGTGGGCGACCTCGCTTTACTTACCGCAGTGCATCCGGGGCGTAGCCGA  
CGTGATGGCCTCTAAGGACCCTTTGAACGGTGCACGACG  
>ITS.405-C2 7638\_G12\_042-H01\_001rc.complete  
GGAAGTAAAAGTTCGTAACAAGGTTTCCGTAGGTGAACCTGCGGAAGGATCATTGTCTGTGA  
CCCTGACCAAATAGACCGTGCACGCGTCATCCAGCCTGCCGGCGGCGGCACCGTTTCGTC  
GCTCGGCCAAGTCTTCGACAGCCTCCTCCTCCTCGGAGTGGGGGCTCGGGGTAAAAGAACC  
CACGACGCCTAAGGCGTCAAGGAACACTGTGCCTAGCCCGGGGACGCGGACGGCTTGCTG  
GCCGCCCCCGTGTGCAATGCTATTTAATCCACACGACTCTCGGCAACGGATATCTCGG  
CTCTCGCATCGATGAAGAACGTAGCGAAATGCGATACCTGGTGTGAATTGCAGAATCCCG  
CGAACCATCGAGTCTTTGAACGCAAGTTGCGCCCCGAGGCCATTTCGGTTGAGGGCACGCCT  
GCCTGGGCGTCACGCAAAACACGCTCCCACACCCTCATCGGGTAGCGGGGCGCGGCATGT  
GGTCCCCCGTAGCGCAAGCTGCGGTGGGCCGAAGATATGGCTGCCGGCGTATCGTGCCGG  
ACACAGCGCGTGGTGGGCGACCTCGCTTTACTTACCGCAGTGCATCCGGGGCGTAGCCGA  
CGTGATGGCCTCTAAGGACCCTATGAACGGTGCACGACG

>ITS.405-C3 7638\_A02\_008-B01\_007rc.complete  
GGAAGTAAAAGTCGTAACAAGGTTTCCGTAGGTGAACCTGCGGAAGGATCATTGTCTGTGA  
CCCTGACCAAATAGACCGTGCACGCGTCATCCAGCCTGCCGGCGGCGGCACCGTTTCGTC  
GCTCGGCCAAGTCCTCGACAACCTCCTCTCCTCGGAGTGGGGGCTCGGGGTAAAAGAACC  
CACGACGCCTAAGGCGTCAAGGAACACTGTGCCTAGCCGGGGACGCGGACGGCTTGCTG  
GCCGCCCCCGTGCTGCAATGCTATTTAATCCACACGACTCTCGGCAACGGATATCTCGG  
CTCTCGCATCGATGAAGAACGTAGCGAAATGCGATACCTGGTGTGAATTGCAGAATCCCC  
CGAACCATCGAGTCTTTGAACGCAAGTTGCGCCCCGAGGCCATTCGGCTGAGGGCACGCCT  
GCCTGGGCGTACGCAAAAACAGCTCCCACACCCTCATCGGGTAGCGGGACGCGGCATGT  
GGTCCCCCGTAGCGCAAGCTGCGGTGGGCCGAAGATATGGCTGCCGGCGTATCGTGCCGG  
ACACAGCGCGTGGTGGGCGACCTCGCTTTACTTACCGCAGTGCATCCGGGGCGTAGCCGA  
CGTGATGGCCTCTAAGGACCCTATGAACGGTGCACGACG

>ITS.405-C4 7638\_B02\_007-C01\_006rc.complete  
GGAAGTAAAAGTCGTAACAAGGTTTCCGTAGGTGAACCTGCGGAAGGATCATTGTCTGTGA  
CCCTGACCAAATAGACCGTGCACGCGTCATCCAGCCTGCCGGCGGCGGCACCGTTTCGTC  
GCTCGGCCAAGTCCTCGACAACCTCCTCTCCTCGGAGTGGGGGCTCGGGGTAAAAGAACC  
CACGACGCCTAAGGCGTCAAGGAACACTGTGCCTAGCCGGGGACGCGGACGGCTTGCTG  
GCCGCCCCCGTGCTGCAATGCTATTTAATCCACACGACTCTCGGCAACGGATATCTCGG  
CTCTCGCATCGATGAAGAACGTAGCGAAATGCGATACCTGGTGTGAATTGCAGAATCCCC  
CGAACCATCGAGTCTTTGAACGCAAGTTGCGCCCCGAGGCCATTCGGCTGAGGGCACGCCT  
GCCTGGGCGTACGCAAAAACAGCTCCCACACCCTCATCGGGTAGCGGGACGCGGCATGT  
GGTCCCCCGTAGCGCAAGCTGCGGTGGGCCGAAGATATGGCTGCCGGCGTATCGTGCCGG  
ACACAGCGCGTGGTGGGCGACCTCGCTTTACTTACCGCAGTGCATCCGGGGCGTAGCCGA  
CGTGATGGCCTCTAAGGACCCTATGAACGGTGCACGACG

>ITS.405-C5 7638\_C02\_006-D01\_005rc.complete  
GGAAGTAAAAGTCGTAACAAGGTTTCCGTAGGTGAACCTGCGGAAGGATCATTGTCTGTGA  
CCCTGACCAAATAGACCGTGCACGCGTCATCCAGCCTGCCGGCGGCGGCACCGTTTCGTC  
GCTCGGCTAAGTCCTCGACAACCTCCTCTCCTCGGAGTGGGGGCTCGGGGTAAAAGAACC  
CACGACGCCTAAGGCGTCAAGGAACACTGTGCCTAGCCGGGGACGCGGACGGCTTGCTG  
GCCGCCCCCGTGCTGCAATGCTATTTAATCCACACGACTCTCGGCAACGGATATCTCGG  
CTCTCGCATCGATGAAGAACGTAGCGAAATGCGATACCTGGTGTGAATTGCAGAATCCCC  
CGAACCATCGAGTCTTTGAACGCAAGTTGCGCCCCGAGGCCATTCGGCTGAGGGCACGCCT  
GCCTGGGCGTACGCAAAAACAGCTCCCACACCCTCATCGGGTAGCGGGACGCGGCATGT  
GGTCCCCCGTAGCGCAAGCTGCGGTGGGCCGAAGATATGGCTGCCGGCGTATCGTGCCGG  
ACACAGCGCGTGGTGGGCGACCTCGCTTTACTTACCGCAGTGCATCCGGGGCGTAGCCAA  
CGTGATGGCCTCTAAGGACCCTTTGAACGGTGCACGACG

>ITS.405-C6 7638\_D02\_005-E01\_004rc.complete  
GGAAGTAAAAGTCGTAACAAGGTTTCCGTAGGTGAACCTGCGGAAGGATCATTGTCTGTGA  
CCCTGACCAAATAGACCGTGCACGCGTCATCCAGCCTGCCGGCGGCGGCACCGTTTCGTC  
GCTCGGCTAAGTCCTCGACAACCTCCTCTCCTCGGAGTGGGGGCTCGGGGTAAAAGAACC  
CACGACGCCTAAGGCGTCAAGGAACACTGTGCCTAGCCGGGGACGCGGACGGCTTGCTG  
GCCGCCCCCGTGCTGCAATGCTATTTAATCCACACGACTCTCGGCAACGGATATCTCGG  
CTCTCGCATCGATGAAGAACGTAGCGAAATGCGATACCTGGTGTGAATTGCAGAATCCCC  
CGAACCATCGAGTCTTTGAACGCAAGTTGCGCCCCGAGGCCATTCGGCTGAGGGCACGCCT  
GCCTGGGCGTACGCAAAAACAGCTCCCACACCCTCATTTGGGTAGCGGGACGCGGCATGT  
GGTCCCCCGTAGCGCAAGCTGCGGTGGGCCGAAGATATGGCTGCCGGCGTATCGTGCCGG  
ACACAGCGCGTGGTGGGCGACCTCGCTTTACTTACCGCAGTGCATCCGGGGCGTAGCCGA  
CGTGATGGCCTCTAAGGACCCTATGAACGGTGCACGACG

>ITS.405-C7 7638\_F01\_003-E02\_004rc.complete  
GGAAGTAAAAGTCGTAACAAGGTTTCCGTAGGTGAACCTGCGGAAGGATCATTGTCTGTGA  
CCCTGACCAAATAGACCGTGCACGCGTCATCCAGCCTGCCGGCGGCGGCACCGTTTCGTC  
GCTCGGCTAAGTCCTCGACAACCTCCTCTCCTCGGAGTGGGGGCTCGGGGTAAAAGAACC  
CACGACGCCTAAGGCGTCAAGGAACACTGTGCCTAGCCGGGGACGCGGACGGCTTGCTG  
GCCGCCCCCGTGCTGCAATGCTATTTAATCCACACGACTCTCGGCAACGGATATCTCGG  
CTCTCGCATCGATGAAGAACGTAGCGAAATGCGATACCTGGTGTGAATTGCAGAATCCCC  
CGAACCATCGAGTCTTTGAACGCAAGTTGCGCCCCGAGGCCATTCGGCTGAGGGCACGCCT  
GCCTGGGCGTACGCAAAAACAGCTCCCACACCCTCATTTGGGTAGCGGGACGCGGCATGT  
GGTCCCCCGTAGCGCAAGCTGCGGTGGGCCGAAGATATGGCTGCCGGCGTATCGTGCCGG  
ACACAGCGCGTGGTGGGCGACCTCGCTTTACTTACCGCAGTGCATCCGGGGCGTAGCCGA  
CGTGATGGCCTCTAAGGACCCTATGAACGGTGCACGACG

CTCTCGCATCGATGAAGAACGTAGCGAAATGCGATACCTGGTGTGAATTGCAGAATCCCG  
CGAACCATCGAGTCTTTGAACGCAAGTTGCGCCCCGAGGCCATTCGGCTGAGGGCACGCCT  
GCCTGGGCGTCACGCAAAACACGCTCCCACACCCTCATCGGGTAGCGGGACGCGGCATGT  
GGTCCCCCGTAGCGCAAGCTGCGGTGGGCCGAAGATATGGCTGCCGGCGTATCGTGCCGG  
ACACAGCGCGTGGTGGGCGACCTCGCTTTACTTACCGCAGTGCATCCGGGGCGTAGCCAA  
CGTGATGGCCTCTAAGGACCCTATGAACGGTGCGCACGACG  
>ITS.405-C8 7638\_G01\_002-F02\_003rc.complete  
GGAAGTAAAAGTCGTAACAAGGTTTCCGTAGGTGAACCTGCGGAAGGATCATTGTCTGTGA  
CCCTGACCAAAATAGACCGTGCACGCGTCATCCAGCCTGCCGGCGGGCACCCTTCGTC  
GCTCGGCCAAGTCTTCGACAACCTCCTCCTCGGAGTGGGGGCTCGGGGTAAAAGAACC  
CACGACGCCTAAGGCGTCAAGGAACACTGTGCCTAGCCCGGGGACGCGGACGGCTTGCTG  
GCCGCCCCCGTGCTGCAATGCTATTTAATCCACACGACTCTCGGCAACGGATATCTCGG  
CTCTCGCATCGATGAAGAACGTAGCGAAATGCGATACCTGGTGTGAATTGCAGAATCCCG  
CGAACCATCGAGTCTTTGAACGCAAGTTGCGCCCCGAGGCCATTCGGCTGAGGGCACGCCT  
GCCTGGGCGTCACGCAAAACACGCTCCCACACCCTCATCGGGTAGCGGGACGCGGCATGT  
GGTCCCCCGTAGCGCAAGCTGCGGTGGGCCGAAGATATGGCTGCCGGCGTATCGTGCCGG  
ACACAGCGCGTGGTGGGCGACCTCGCTTTACTTACCGCAGTGCATCCGGGGCGTAGCCAA  
CGTGATGGCCTCTAAGGACCCTATGAACGGTGCGCACGACG  
>ITS.483-C1 7638\_49rc-57  
GGAAGTAAAAGTCGTAACAAGGTTTCCGTAGGTGAACCTGCGGAAGGATCATTGTCTGTGA  
CCCTGACCAAAATAGACCGCGCACGCGTAATCCAGCCTGCCGGCGATGGCATCGTCCGTC  
GCTCGGCCAAGTCTTCGACAACCTCATCTCCTCGGAGTGGGGCTCGGGGTAAAAGAACC  
ACGACGCCTAAGGCGTCAAGGAACACTGTGCCTAGCCCGGGGACGCGGACGGCTTGCTGG  
CCGCCCCCGTGCTGCAATGCTATTTAATCCACACGACTCTCGGCAACGGATATCTCGGC  
TCTCGCATCGATGAAGAACGTAGCGAAATGCGATACCTGGTGTGAATTGCAGAATCCCGC  
GAACCATCGAGTCTTTGAACGCAAGTTGCGCCCCGAGGCCATTCGGCTGAGGGCACGCCTG  
CCTGGGCGTCACGCAAAACACGCTCCCACCCCCTCATCGGGTAGAGGGACGCGGCATGTG  
GCCCCCGTAGCGCAAGCTGCGGTGGGCCGAAGATATGGCTGCCGGCGTATCGTGCCGGA  
CACAGCGTGTGGTGAAGCGACCTCGCTTTACTTACCGCAGTGCATCCGGGGCGTAGCCGAC  
GTGATGGCCTCCAAGGACCCTATGAACGGTGCGCACGACG  
>ITS.483-C2 7638\_50-58rc  
GGAAGTAAAAGTCGTAACAAGGTTTCCGTAGGTGAACCTGCGGAAGGATCATTGTCTGTGA  
CCCTGACCAAAATAGACCGCGCACGCGTAATCCAGCCTGCCGGCGATGGCATCGTCCGTC  
GCTCGGCCAAGTCTTCGACAACCTCATCTCCTCGGAGTGGGGCTCGGGGTAAAAGAACC  
ACGACGCCTAAGGCGTCAAGGAACACTGTGCCTAGCCCGGGGACGCGGACGGCTTGCTGG  
CCGCCCCCGTGCTGCAATGCTATTTAATCCACACGACTCTCGGCAACGGATATCTCGGC  
TCTCGCATCGATGAAGAACGTAGCGAAATGCGATACCTGGTGTGAATTGCAGAATCCCGC  
GAACCATCGAGTCTTTGAACGCAAGTTGCGCCCCGAGGCCATTCGGCTGAGGGCACGCCTG  
CCTGGGCGTCACGCAAAACACGCTCCCACCCCCTCATCGGGTAGCGGGACGCGGCATGTG  
GCCCCCGTAGCGCAAGCTGCGGTGGGCCGAAGATATGGCTGCCGGCGTATCGTGCCGGA  
CACAGCGTGTGGTGAAGCGACCTCGCTTTACTTACCGCAGTGCATCCGGGGCGTAGCCGAC  
GTGATGGCCTCTAAGGACCCTATGAACGGTGCGCACGACG  
>ITS.483-C3 7638\_51-59rc  
GGAAGTAAAAGTCGTAACAAGGTTTCCGTAGGTGAACCTGCGGAAGGATCATTGTCTGTGA  
CCCTGACCAAAATAGACCGCGCACGCGTAATCCAGCCTGCCGGCGATGGCATCGTCCGTC  
GCTCGGCCAAGTCTTCGACAACCTCATCTCCTCGGAGTGGGGCTCGGGGTAAAAGAACC  
ACGACGCCTAAGGCGTCAAGGAACACTGTGCCTAGCCCGGGGACGCGGACGGCTTGCTGG  
CCGCCCCCGTGCTGCAATGCTATTTAATCCACACGACTCTCGGCAACGGATATCTCGGC  
TCTCGCATCGATGAAGAACGTAGCGAAATGCGATACCTGGTGTGAATTGCAGAATCCCGC  
GAACCATCGAGTCTTTGAACGCAAGTTGCGCCCCGAGGCCATTCGGCTGAGGGCACGCCTG  
CCTGGGCGTCACGCAAAACACGCTCCCACCCCCTCATCGGGTAGCGGGACGCGGCATGTG  
GCCCCCGTAGCGCAAGCTGCGGTGGGCCGAAGATATGGCTGCCGGCGTATCGTGCCGGA  
CACAGCGCGTGGTGAAGCGACCTCGCTTTACTTACCGCAGTGCATCCGGGGCGTAGCCGAC  
GTGATGGCCTCTAAGGACCCTATGAACGGTGCGCACGACG

>ITS.483-C4 7638\_52rc-60  
GGAAGTAAAAGTTCGTAACAAGGTTTCCGTAGGTGAACCTGCGGAAGGATCATTGTTCGTGA  
CCCTGACCAAATAGACCGCGCACGCGTAATCCAGCCTGCCGGCGACGGCACCGTCCGTC  
GCTCGGCCAAGTCTCGACAACCTCATCTCCTCGGAGTGGGGCTCGGGGTAAAAGAACC  
ACGACGCCTAAGGCGTCAAGGAACACTGTGCCTAGCCCAGGGACGCGGACGGCTTGCTGG  
CCGCCCCCGTGTGCAATGCTATTTAATCCACACGACTCTCGGCAACGGATATCTCGGC  
TCTCGCATCGATGAAGAACGTAGCGAAATGCGATACCTGGTGTGAATTGCAGAATCCCGC  
GAACCATCGAGTCTTTGAACGCAAGTTGCGCCCGAGGCCATTTCGGCTGAGGGCACGCCTG  
CCTGGGCGTCACGCAAAACACGCTCCCACCCCCTCATCGGGTAGCGGGACGCGGCATGTG  
GCCCCCGTAGCGCAAGCTGCGGTGGGCCGAAGATATGGCTGCCGGCGTATCGTGCCGGA  
CACAGCGTGTGGTGAGCGACCTCGCTTTACTTACCGCAGTGCATCCGGGGCGTAGCCGAC  
GTGATGGCCTCCAAGGACCCTATGAACGGTGCACGACG

>ITS.483-C5 7638\_53-61rc  
GGAAGTAAAAGTTCGTAACAAGGTTTCCGTAGGTGAACCTGCGGAAGGATCATTGTTCGTGA  
CCCTGACCAAATAGACCGCGCACGCGTAATCCAGCCTGCCGGCGATGGCACCGTTTCGTC  
GCTCGGCCAAGTCTCGACAACCTCATCTCCTCGGAGTGGGGCTCGGGGTAAAAGAACC  
ACGACGCCTAAGGCGTCAAGGAACACTGTGCCTAGCCCAGGGACGCGGACGGCTTGCTGG  
CCGCCCCCGTGTGCAATGCTATTTAATCCACACGACTCTCGGCAACGGATATCTCGGC  
CTCGCATCGATGAAGAACGTAGCGAAATGCGATATCTGGTGTGAATTGCAGAATCCCGC  
AACCATCGAGTCTTTGAACGCAAGTTGCGCCCGAGGCCATTTCGGCTGAGGGCACGCCTGC  
CTGGGCGTCACGCAAAACACGCTCCCACCCCCTCATCGGGTAGCGGGACGCGGCATGTG  
CCCCCGTAGCGCAAGCTGCGGTGGGCCGAAGATATGGCTGCCGGCGTATCGTGCCGGAC  
ACAGCGCGTGGTGAGCGACCTCGCTTTACTTACCGCAGTGCATCCGGGGCGTAGCCGAC  
TGATGGCCTCCAAGGACCCTATGAACGGTGCACGACG

>ITS.483-C6 7638\_54-62rc  
GGAAGTAAAAGTTCGTAACAAGGTTTCCGTAGGTGAACCTGCGGAAGGATCATTGTTCGTGA  
CCCTGACCAAATAGACCGCGCACGCGTAATCCAGCCTGCCGGCGATGGCACCGTCCGTC  
GCTCGGCCAAGTCTCGACAACCTCATCTCCTCGGAGTGGGGCTCGGGGTAAAAGAACC  
ACGACGCCTAAGGCGTCAAGGAACACTGTGCCTAGCCCAGGGACGCGGACGGCTTGCTGG  
CCGCCCCCGTGTGCAATGCTATTTAATCCACACGACTCTCGGCAACGGATATCTCGGC  
TCTCGCATCGATGAAGAACGTAGCGAAATGCGATACCTGGTGTGAATTGCAGAATCCCGC  
GAACCATCGAGTCTTTGAACGCAAGTTGCGCCCGAGGCCATTTCGGCTGAGGGCACGCCTG  
CCTGGGCGTCACGCAAAACACGCTCCCACCCCCTCATCGGGTAGCGGGACGCGGCATGTG  
GCCCCCGTAGCGCAAGCTGCGGTGGGCCGAAGATATGGCTGCCGGCGTATCGTGCCGGA  
CACAGCGCGTGGTGAGCGACCTCGCTTTACTTACCGCAGTGCATCCGGGGCGTAGCCGAC  
GTGATGGCCTCCAAGGACCCTATGAACGGTGCACGACG

>ITS.483-C7 7638\_55-63rc  
GGAAGTAAAAGTTCGTAACAAGGTTTCCGTAGGTGAACCTGCGGAAGGATCATTGTTCGTGA  
CCCTGACCAAATAGACCGCGCACGCGTAATCCAGCCTGCCGGCGACGGCACCGTCCGTC  
GCTCGGCCAAGTCTCGACAACCTCATCTCCTCGGAGTGGGGCTCGGGGTAAAAGAACC  
ACGACGCCTAAGGCGTCAAGGAACACTGTGCCTAGCCCAGGGACGCGGACGGCTTGCTGG  
CCGCCCCCGTGTGCAATGCTATTTAATCCACACGACTCTCGGCAACGGATATCTCGGC  
TCTCGCATCGATGAAGAACGTAGCGAAATGCGATACCTGGTGTGAATTGCAGAATCCCGC  
GAACCATCGAGTCTTTGAACGCAAGTTGCGCCCGAGGCCATTTCGGCTGAGGGCACGCCTG  
CCTGGGCGTCACGCAAAACACGCTCCCACCCCCTCATCGGGTAGCGGGACGCGGCATGTG  
GCCCCCGTAGCGCAAGCTGCGGTGGGCCGAAGATATGGCTGCCGGCGTATCGTGCCGGA  
CACAGCGCGTGGTGAGCGACCTCACCTTACTTACCGCAGTGCATCCGGGGCGTAGCCGAC  
GTGATGGCCTCCAAGGACCCTATGAACGGTGCACGACG

>ITS.483-C8 7638\_56-64rc  
GGAAGTAAAAGTTCGTAACAAGGTTTCCGTAGGTGAACCTGCGGAAGGATCATTGTTCGTGA  
CCCTGACCAAATAGACCGCGCACGCGTAATCCAGCCTGCCGGCGATGGCATCGTCCGTC  
GCTCGGCCAAGTCTCGACAACCTCATCTCCTCGGAGTGGGGCTCGGGGTAAAAGAACC  
ACGACGCCTAAGGCGTCAAGGAACACTGTGCCTAGCCCAGGGACGCGGACGGCTTGCTGG  
CCGCCCCCGTGTGCAATGCTATTTAATCCACACGACTCTCGGCAACGGATATCTCGGC  
TCTCGCATCGATGAAGAACGTAGCGAAATGCGATACCTGGTGTGAATTGCAGAATCCCGC  
GAACCATCGAGTCTTTGAACGCAAGTTGCGCCCGAGGCCATTTCGGCTGAGGGCACGCCTG  
CCTGGGCGTCACGCAAAACACGCTCCCACCCCCTCATCGGGTAGCGGGACGCGGCATGTG  
GCCCCCGTAGCGCAAGCTGCGGTGGGCCGAAGATATGGCTGCCGGCGTATCGTGCCGGA  
CACAGCGCGTGGTGAGCGACCTCACCTTACTTACCGCAGTGCATCCGGGGCGTAGCCGAC  
GTGATGGCCTCCAAGGACCCTATGAACGGTGCACGACG

TCTCGCATCGATGAAGAACGTAGCGAAATGCGATACCTGGTGTGAATTGCAGAATCCCGC  
GAACCATCGAGTCTTTGAACGCAAGTTGCGCCCGAGGCCATTTCGGCTGAGGGCACGCCTG  
CCTGGGCGTCACGCAAAACACGCTCCCACCCCTCATCGGGTAGCGGGACGCGGCATGTG  
GCCCCCGTAGCGCAAGCTGCGGTGGGCCGAAGATATGGCTGCCGGCGTATCGTGCCGGA  
CACAGCGCGTGGTGTAGCGACCTCGCTTTACTTACCGCAGTGCATCCGGGGCGTAGCCGAC  
GTGATGGCCTCTAAGGACCCTATGAACGGTGCACGACG  
>ITS.M008A-C1 7638\_65rc-73.complete  
GGAAGTAAAAGTTCGTAACAAGGTTTCCGTAGGTGAACCTGCGGAAGGATCATTGTCTGTGA  
CCCTGACCAAATAGACCGTGCACGCGTCATCCAGCCTGCCGGCGGGCACCCTTCGTC  
GCTCGGCCAAGTCTCGACAACCTCCTCTCCTCGGAGTGGGGGCTCGGGGTAAAAGAACC  
CACGACGCCTAAGGCGTCAAGGAACACTGTGCCTAGCCGGGGACGCGGACGGCTTGCTG  
GCCGCCCCCGTGCTGCAATGCTATTTAATCCACACGACTCTCGGCAACGGATATCTCGG  
CTCTCGCATCGATGAAGAACGTAGCGAAATGCGATACCTGGTGTGAATTGCAGAATCCCG  
CGAACCATCGAGTCTTTGAACGCAAGTTGCGCCCGAGGCCATTTCGGCTGAGGGCACGCCT  
GCCTGGGCGTACGCAAAACACGCTCCCACACCCTCATCGGGTAGCGGGACGCGGCATGT  
GGTCCCCCGTAGCGCAAGCTGCGGTGGGCCGAAGATATGGCTGCCGGCGTATCGTGCCGG  
ACACAGCGCGTGGTGGGCGACCTCGCTTTACTTACCGCAGTGCATCCGGGGCGTAGCCGA  
CGTGATGGCCTCTAAGGACCCTATGAACGGTGCACGACG  
>ITS.M008A-C2 7638\_66rc-74.complete  
GGAAGTAAAAGTTCGTAACAAGGTTTCCGTAGGTGAACCTGCGGAAGGATCATTGTCTGTGA  
CCCTGACCAAATAGACCGTGCACGCGTCATCCAGCCTGCCGGCGGGCACCCTTCGTC  
GCTCGGCCAAGTCTCGACAACCTCCTCTCCTCGGAGTGGGGGCTCGGGGTAAAAGAACC  
CACGACGCCTAAGGCGTCAAGGAACACTGTGCCTAGCCGGGGACGCGGACGGCTTGCGG  
GCCGCCCCCGTGCTGCAATGCTATTTAATCCACACGACTCTCGGCAACGGATATCTCGG  
CTCTCGCATCGATGAAGAACGTAGCGAAATGCGATACCTGGTGTGAATTGCAGAATCCCG  
CGAACCATCGAGTCTTTGAACGCAAGTTGCGCCCGAGGCCATTTCGGCTGAGGGCACGCCT  
GCCTGGGCGTACGCAAAACACGCTCCCACACCCTCATCGGGTAGCGGGACGCGGCCTTGT  
GGTTCCCCCGTAGCGCAAGCTGCGGTGGGCCGAAGATATGGCTGCCGGCGTATCGTGCCGG  
ACACAGCGCGTGGTGGGCGACCTCGCTTTACTTACCGCAGTGCATCCGGGGCGTAGCCGA  
CGTGATGGCCTCTAAGGACCCTTTGAACGGTGCACGACG  
>ITS.M008A-C3 7638\_67-75rc.complete  
GGAAGTAAAAGTTCGTAACAAGGTTTCCGTAGGTGAACCTGCGGAAGGATCATTGTCTGTGA  
CCCTGACCAAATAGACCGTGCACGCGTCATCCAGCCTGCCGGCGGGCACCCTTCGTC  
GCTCGGCCAAGTCTCGACAACCTCCTCTCCTCGGAGTGGGGGCTCGGGGTAAAAGAACC  
CACGACGCCTAAGGCGTCAAGGAACACTGTGCCTAGCTCGGGGACGCGGACGGCTTGCTG  
GCCGCCCCCTCGTGCTGCAATGCTATTTAATCCACACGACTCTCGGCAACGGATATCTCGG  
CTCTCGCATCGATGAAGAACGTAGCGAAATGCGATACCTGGTGTGAATTGCAGAATCCCG  
CGAACCATCGAGTCTTTGAACGCAAGTTGCGCCCGAGGCCATTTCGGCTGAGGGCACGCCT  
GCCTGGGCGTACGCAAAACACGCTCCCACACCCTCATCGGGTAGCGGGACGCGGCATGT  
GGTCCCCCGTAGCGCAAGCTGCGGTGGGCCGAAGATATGGCTGCCGGCGTATCGTGCCGG  
ACACAGCGCGTGGTGGGCGACCTCGCTTTACTTACCGCAGTGCATCCGGGGCGTAGCCGA  
CGTGATGGCCTCTAAGGACCCTATGAACGGTGCACGACG  
>ITS.M008A-C4 7638\_68-76rc.complete  
GGAAGTAAAAGTTCGTAACAAGGTTTCCGTAGGTGAACCTGCGGAAGGATCATTGTCTGTGA  
CCCTGACCAAATAGACCGTGCACGCGTCATCCAGCCTGCCGGCGGGCACCCTTCGTC  
GCTCGGCCAAGTCTCGACAACCTCCTCTCCTCGGAGTGGGGGCTCGGGGTAAAAGAACC  
CACGACGCCTAAGGCGTCAAGGAACACTGTGCCTAGCCGGGGACGCGGACGGCTTGCTG  
GCCGCCCCCGTGCTGCAATGCTATTTAATCCACACGACTCTCGGCAACGGATATCTCGG  
CTCTCGCATCGATGAAGAACGTAGCGAAATGCGATACCTGGTGTGAATTGCAGAATCCCG  
CGAACCATCGAGTCTTTGAACGCAAGTTGCGCCCGAGGCCATTTCGGCTGAGGGCACGCCT  
GCCTGGGCGTACGCAAAACACGCTCCCACACCCTCATCGGGTAGCGGGACGCGGCATGT  
GGTCCCCCGTAGCGCAAGCTGCGGTGGGCCGAAGATATGGCTGCCGGCGTATCGTGCCGG  
ACACAGCGCGTGGTGGGCGACCTCGCTTTACTTACCGCAGTGCATCCGGGGCGTAGCCGA  
CGTGATGGCCTCTAAGGACCCTATGAACGGTGCACGACG



>ITS.M008A-C5 7638\_69-77rc.complete  
GGAAGTAAAAGTCGTAACAAGGTTTCCGTAGGTGAACCTGCGGAAGGATCATTGTTCGTGA  
CCCTGACCAAATAGACCGTGCACGCGTCATCCAGCCTGCCGGCGGCGGCACCGTTTCGTG  
GCTCGGCCAAGTCCTCGACAACCTCCTCTCCTCGGAGTGGGGGCTCGGGGTAAAAGAACC  
CACGACGCCTAAGGCGTCAAGGAACACTGTGCCTAGCCGGGGACGCGGACGGCTTGCTG  
GCCGCCCCCGTGCTGCAATGCTATTTAATCCACACGACTCTCGGCAACGGATATCTCGG  
CTCTCGCATCGATGAAGAACGTAGCGAAATGCGATACCTGGTGTGAATTGCAGAATCCCC  
CGAACCATCGAGTCTTTGAACGCAAGTTGCGCCCCGAGGCCATTCGGCTGAGGGCACGCCT  
GCCTGGGCGTACGCAAAAACAGCTCCCACACCCTCATCGGGTAGCGGGACGCGGCATGT  
GGTCCCCCGTAGCGCAAGCTGCGGTGGGCCGAAGATATGGCTGCCGGCGTATCGTGCCGG  
ACACAGCGCGTGGTGGGCGACCTCGCTTTACTTACCGCAGTGCATCCGGGGCGTAGCCGA  
CGTGATGGCCTCTAAGGACCCTATGAACGGTGCACGACG

>ITS.M008A-C6 7638\_70rc-78.complete  
GGAAGTAAAAGTCGTAACAAGGTTTCCGTAGGTGAACCTGCGGAAGGATCATTGTTCGTGA  
CCCTGACCAAATAGACCGTGCACGCGTCATCCAGCCTGCCGGCGGCGGCACCGTTTCGTG  
GCTCGGCCAAGTCCTCGACAACCTCCTCTCCTCGGAGTGGGGGCTCGGGGTAAAAGAACC  
CACGACGCCTAAGGCGTCAAGGAACACTGTGCCTAGCCGGGGACGCGGACGGCTTGCTG  
GCCGCCCCCGTGCTGCAATGCTATTTAATCCACACGACTCTCGGCAACGGATATCTCGG  
CTCTCGCATCGATGAAGAACGTAGCGAAATGCGATACCTGGTGTGAATTGCAGAATCCCC  
CGAACCATCGAGTCTTTGAACGCAAGTTGCGCCCCGAGGCCATTCGGCTGAGGGCACGCCT  
GCCTGGGCGTACGCAAAAACAGCTCCCACACCCTCATCGGGTAGCGGGACGCGGCCTTGT  
GGTCCCCCGTAGCGCAAGCTGCGGTGGGCCGAAGATATGGCTGCCGGCGTATCGTGCCGG  
ACACAGCGCGTGGTGGGCGACCTCGCTTTACTTACCGCAGTGCATCCGGGGCGTAGCCGA  
CGTGATGGCCTCTAAGGACCCTTTGAACGGTGCACGACG

>ITS.M008A-C7 7638\_71-79rc.complete  
GGAAGTAAAAGTCGTAACAAGGTTTCCGTAGGTGAACCTGCGGAAGGATCATTGTTCGTGA  
CCCTGACCAAATAGACCGTGCACGCGTCATCCAGCCTGCCGGCGGCGGCACCGTTTCGTG  
GCTCGGCCAAGTCCTCGACAACCTCCTCTCCTCGGAGTGGGGGCTCGGGGTAAAAGAACC  
CACGGCGCCTAAGGCGTCAAGGAACACTGTGCCTAGCTCGGGGACGCGGACGGCTTGCTG  
GCCGCCCCCTCGTGCTGCAATGCTATTTAATCCACACGACTCTCGGCAACGGATATCTCGG  
CTCTCGCATCGATGAAGAACGTAGCGAAATGCGATACCTGGTGTGAATTGCAGAATCCCC  
CGAACCATCGAGTCTTTGAACGCAAGTTGCGCCCCGAGGCCATTCGGCTGAGGGCACGCCT  
GCCTGGGCGTACGCAAAAACAGCTCCCACACCCTCATCGGGTAGCGGGACGCGGCATGT  
GGTCCCCCGTAGCGCAAGCTGCGGTGGGCCGAAGATATGGCTGCCGGCGTATCGTGCCGG  
ACACAGCGCGTGGTGGGCGACCTCGCTTTACTTACCGCAGTGCATCCGGGGCGTAGCCGA  
CGTGATGGCCTCTAAGGACCCTTTGAACGGTGCACGACG

>ITS.M008A-C8 7638\_72rc-80.complete  
GGAAGTAAAAGTCGTAACAAGGTTTCCGTAGGTGAACCTGCGGAAGGATCATTGTTCGTGA  
CCCTGACCAAATAGACCGTGCACGCGTCATCCAGCCTGCCGGCGGCGGCACCGTTTCGTG  
GCTCGGCCAAGTCCTCGACAACCTCCTCTCCTCGGAGTGGGGGCTCGGGGTAAAAGAACC  
CACGACGCCTAAGGCGTCAAGGAACACTGTGCCTAGCCGGGGACGCGGACGGCTTGCTG  
GCCGCCCCCGTGCTGCAATGCTATTTAATCCACACGACTCTCGGCAACGGATATCTCGG  
CTCTCGCATCGATGAAGAACGTAGCGAAATGCGATACCTGGTGTGAATTGCAGAATCCCC  
CGAACCATCGAGTCTTTGAACGCAAGTTGCGCCCCGAGGCCATTCGGCTGAGGGCACGCCT  
GCCTGGGCGTACGCAAAAACAGCTCCCACACCCTCATCGGGTAGCGGGACGCGGCCTTGT  
GGTCCCCCGTAGCGCAAGCTGCGGTGGGCCGAAGATATGGCTGCCGGCGTATCGTGCCGG  
ACACAGCGCGTGGTGGGCGACCTCGCTTTACTTACCGCAGTGCATCCGGGGCGTAGCCGA  
CGTGATGGCCTCTAAGGACCCTTTGAACGGTGCACGACG

>ITS.M397-C1 7638\_81rc-89.complete  
GGAAGTAAAAGTCGTAACAAGGTTTCCGTAGGTGAACCTGCGGAAGGATCATTGTTCGTGA  
CCCTGACCAAATAGACCGTGCACGCGTCATCCAGCCTGCCGGCGGCGGCACCGTTTCGTG  
GCTCGGCCAAGTCCTCGACAACCTCCTCTCCTCGGAGTGGGGGCTCGGGGTAAAAGAACC  
CACGACGCCTAAGGCGTCAAGGAACACTGTGCCTAGCCGGGGACGCGGACGGCTTGCTG  
GCCGCCCCCGTGCTGCAATGCTATTTAATCCACACGACTCTCGGCAACGGATATCTCGG  
CTCTCGCATCGATGAAGAACGTAGCGAAATGCGATACCTGGTGTGAATTGCAGAATCCCC  
CGAACCATCGAGTCTTTGAACGCAAGTTGCGCCCCGAGGCCATTCGGCTGAGGGCACGCCT  
GCCTGGGCGTACGCAAAAACAGCTCCCACACCCTCATCGGGTAGCGGGACGCGGCCTTGT  
GGTCCCCCGTAGCGCAAGCTGCGGTGGGCCGAAGATATGGCTGCCGGCGTATCGTGCCGG  
ACACAGCGCGTGGTGGGCGACCTCGCTTTACTTACCGCAGTGCATCCGGGGCGTAGCCGA  
CGTGATGGCCTCTAAGGACCCTTTGAACGGTGCACGACG

CTCTCGCATCGATGAAGAACGTAGCGAAATGCGATACCTGGTGTGAATTGCAGAATCCCG  
CGAACCATCGAGTCTTTGAACGCAAGTTGCGCCCCGAGGCCATTCGGCTGAGGGCACGCCT  
GCCTGGGCGTCACGCAAAACATGCTCCCACACCCTCATCGGGTAGCGGGACGCGGCATGT  
GGTACCCCGTAGCGCAAGCTGAGGTGGGCCGAAGATATGGCTGCCGGCGTATCGTGCCGG  
ACACAGCGCGTGGTGGGCGACCTCGCTTTACTTACCGCAGTGCATCCGGGGCGTAGCCGA  
CGTGATGGCCTCTAAGGACCCTTTGAACGGTGCACGACG  
>ITS.M397-C2 7638\_82-90rc.complete  
GGAAGTAAAAGTCGTAAACAAGGTTTCCGTAGGTGAACCTGCGGAAGGATCATTGTCTGTGA  
CCCTGACCAAAATAGACCGTGCACGCGTCATCCAGCCTGCCGGCGGCGGCACCGTTTCGTC  
GCTCGGCCAAGTCTCGACAACCTCCTCTCCTCGGAGTGGGGGCTCGGGGTAAAAGAACC  
CACGACGCCTAAGGCGTCAAGGAACACTGTGCCTAGCCCGGGGACGCGGACGGCTTGCTG  
GCCGCCCCCGTGCTGCAATGCTATTTAATCCACACGACTCTCGGCAACGGATATCTCGG  
CTCTCGCATCGATGAAGAACGTAGCGAAATGCGATACCTGGTGTGAATTGCAGAATCCCG  
CGAACCATCGAGTCTTTGAACGCAAGTTGCGCCCCGAGGCCATTCGGCTGAGGGCACGCCT  
GCCTGGGCGTCACGCAAAACACGCTCCCACACCCTCATCGGGTAGCGGGACGCGGCATGT  
GGTCCCCCGTAGCGCAAGCTGCGGTGGGCCGAAGATATGGCTGCCGGCGTATCGTGCCGG  
ACACAGCGCGTGGTGGGCGACCTCGCTTTACTTACCGCAGTGCATCCGGGGCGTAGCCGA  
CGTGATGGCCTCTAAGGACCCTATGAACGGTGCACGACG  
>ITS.M397-C3 7638\_83rc-91.complete  
GGAAGTAAAAGTCGTAAACAAGGTTTCCGTAGGTGAACCTGCGGAAGGATCATTGTCTGTGA  
CCCTGACCAAAATAGACCGTGCACGCGTCATCCAGCCTGCCGGCGGCGGCACCTGTTTCGTC  
GCTCGGCCAAGTCTCGACAACCTCCTCTCCTCGGAGTGGGGGCTCGGGGTAAAAGAACC  
CACGACGCCTAAGGCGTCAAGGAACACTGTGCCTAGCCCGGGGACGCGGACGGCTTGCTG  
GCCGCCCCCGTGCTGCAATGCTATTTAATCCACACGACTCTCGGCAACGGATATCTCGG  
CTCTCGCATCGATGAAGAACGTAGCGAAATGCGATACCTGGTGTGAATTGCAGAATCCCG  
CGAACCATCGAGTCTTTGAACGCAAGTTGCGCCCCGAGGCCATTCGGCTGAGGGCACGCCT  
GCCTGGGCGTCACGCAAAACACGCTCCCACACCCTCATCGGGTAGCGGGACGCGGCATGT  
GGTCCCCCGTAGCGCAAGCTGCGGTGGGCCGAAGATATGGCTGCCGGCGTATCGTGCCGG  
ACACAGCGCGTGGTGGGCGACCTCGCTTTACTTACCGCAGTGCATCCGGGGCGTAGCCGA  
CGTGATGGCCTCTAAGGACCCTATGAACGGTGCACGACG  
>ITS.M397-C4 7638\_84rc-92.complete  
GGAAGTAAAAGTCGTAAACAAGGTTTCCGTAGGTGAACCTGCGAAAGGATCATTGTCTGTGA  
CGCTGACCAAAATAGACCATGCACGCGTCATCCAGCCTGCCGGCGGCGGCACCGTTTCGTC  
GCTCGGCCAAGTCTCGACAACCTCCTCTCCTCGGAGTGGGGGCTCGAGGTAAAAGAACC  
CACGACGCCTAAGGCGTCAAGGAACACTGTGCCTAGCCCGGGGACGCGGACGGCTTGCTG  
GCCGCCCCCTCGTGCTGCAATGCTATTTAATCCACACGACTCTCGGCAACGGATATCTCGG  
CTCTCGCATCGATGAAGAACGTAGCGAAATGCGATACCTGGTGTGAATTGCAGAATCCCG  
CGAACCATCGAGTCTTTGAACGCAAGTTGCGCCCCGAGGCCATTCGGCTGAGGGCACGCCT  
GCCTGGGCGTCACGCAAAACACGCTCCCACACCCTCATCGGGTAGCGGGACGCGGCATGT  
GGTCCCCCGTAGCGCAAGCTGCGGTGGGCCGAAGATATGGCTGCCGGCGTATCGTGCCGG  
ACACAGCGCGTGGTGGGCGACCTCGCTTTACTTACCGCAGTGCATCCGGGGCGTAGCCGA  
CGTGATGGCCTCTAAGGACCCTATGAACGGTGCACGACG  
>ITS.M397-C5 7638\_85-93rc.complete  
GGAAGTAAAAGTCGTAAACAAGGTTTCCGTAGGTGAACCTGCGGAAGGATCATTGTCTGTGA  
CCCTGACCAAAATAGACCGTGCACGCGTCATCCAGCCTGCCGGCGGCGGCACCGTTTCGTC  
GCTCGGCCAAGTCTCGACAACCTCCTCTCCTCGGAGTGGGGGCTCGGGGTAAAAGAACC  
CACGACGCCTAAGGCGTCAAGGAACACTGTGCCTAGCCCGGGGACGCGGACGGCTTGCTG  
GCCGCCCCCGTGCTGCAATGCTATTTAATCCACACGACTCTCGGCAACGGATATCTCGG  
CTCTCGCATCGATGAAGAACGTAGCGAAATGCGATACCTGGTGTGAATTGCAGAATCCCG  
CGAACCATCGAGTCTTTGAACGCAAGTTGCGCCCCGAGGCCATTCGGCTGAGGGCACGCCT  
GCCTGGGCGTCACGCAAAACACGCTCCCACACCCTCATCGGGTAGCGGGACGCGGCATGT  
GGTCCCCCGTAGCGCAAGCTGCGGTGGGCCGAAGATATGGCTGCCGGCGTATCGTGCCGG  
ACACAGCGCGTGGTGGGCGACCTCGCTTTACTTACCGCAGTGCATCCGGGGCGTAGCCGA  
CGTGATGGCCTCTAAGGACCCTATGAACGGTGCACGACG

>ITS.M397-C6 7638\_86-94rc.complete  
GGAAGTAAAAGTCGTAACAAGGTTTCCGTAGGTGAACCTGCGGAAGGATCATTGTCTGTGA  
CCCTGACCAAATAGACCGTGCACGCGTCATCCAGCCTGCCGGCGGCGGCACCGTTTCGTC  
GCTCGGCCAAGTCCTCGACAACCTCCTCTCCTCGGAGTGGGGGCTCGGGGTAAAAGAACC  
CACGACGCCTAAGGCGTCAAGGAACACTGTGCCTAGCCCGGGGACGCGGACGGCTTGCTG  
GCCGCCCCCGTGCTGCAATGCTATTTAATCCACACGACTCTCGGCAACGGATATCTCGG  
CTCTCGCATCGATGAAGAACGTAGCGAAATGCGATACCTGGTGTGAATTGCAGAATCCCG  
CGAACCATCGAGTCTTTGAACGCAAGTTGCGCCCCGAGGCCATTCGGCTGAGGGCACGCCT  
GCCTGGGCGTCACGCAAAACACGCTCCCACACCCTCATCGGGTAGCGGGACGCGGCATGT  
GGTCCCCCGTAGCGCAAGCTGCGGTGGGCCGAAGATATGGCTGCCGGCGTATCGTGCCGG  
ACACAGCGCGTGGTGGGCGACCTCGCTTTACTTACCGCAGTGCATCCGGGGCGTAGCCGA  
CGTGATGGCCTCTAAGGACCCTATGAACGGTGCACGACG

>ITS.M397-C7 7638\_87-95rc.complete  
GGAAGTAAAAGTCGTAACAAGGTTTCCGTAGGTGAACCTGCGGAAGGATCATTGTCTGTGA  
CCCTGACCAAATAGACCGTGCACGCGTCATCCAGCCTGCCGGCGGCGGCACCGTTTCGTC  
GCTCGGCCAAGTCCTCGACAGCCTCCTCTCCTCGGAGTGGGGGCTCGGGGTAAAAGAACC  
CACGACGCCTAAGGCGTCAAGGAACACTGTGCCTAGCCCGGGGACGCGGACGGCTTGCTG  
GCCGCCCCCGTGCTGCAATGCTATTTAATCCACACGACTCTCGGCAACGGATATCTCGG  
CTCTCGCATCGATGAAGAACGTAGCGAAATGCGATACCTGGTGTGAATTGCAGAATCCCG  
CGAACCATCGAGTCTTTGAACGCAAGTTGCGCCCCGAGGCCATTCGGCTGAGGGCACGCCT  
GCCTGGGCGTCACGCAAAACACGCTCCCACACCCTCATCGGGTAGCGGGACGCGGCATGT  
GGTCCCCCGTAGCGCAAGCTGCGGTGGGCCGAAGATATGGCTGCCGGCGTATCGTGCCGG  
ACACAGCGCGTGGTGGGCGACCTCGCTTACTTACCGCAGTGCATCCGGGGCGTAGCCGA  
CGTGATGGCCTCTAAGGACCCTATGAACGGTGCACGACG

>ITS.15\_C1\_ITS.3-MLZ\_7561 E04.012-F04\_011.complete  
GGAAGTAAAAGTCGTAACAAGGTTTCCGTAGGTGAACCTGCGGAAGGATCATTGTCTGTGA  
CCCTGACCAAATAGACCGTGCACGCGTCATCCAGCCTGCCGGCGGCGGCACCGTTTCGTC  
GCTCGGCCAAGTCCTCGACAACCTCCTCTCCACGAGTGGGGGCTCGGGGTAAAAGAACC  
CACGACGCCTAAGGCGTCAAGGAACACTGTGCCTAGCCCGGGGACGCGGACGGCTTGCTG  
GCCGCCCCCGTGCTGCAATGCTATTTAATCCACACGACTCTCGGCAACGGATATCTCGG  
CTCTCGCATCGATGAAGAACGTAGCGAAATGCGATACCTGGTGTGAATTGCAGAATCCCG  
CGAACCATCGAGTCTTTGAACGCAAGTTGCGCCCCGAGGCCATTCGGCTGAGGGCACGCCT  
GCCTGGGCGTCACGCAAAACACGCTCCCACACCCTCATCGGGTAGCGGGACGCGGCATGT  
GGTCCCCCGTAGCGCAAGCTGCGGTGGGCCGAAGATATGGCTGCCGGCGTATCGTGCCGG  
ACACAGCGCGTGGTGGGCGACCTCGCTTTACTTACCGCAGTGCATCCGGGGCGTAGCCGA  
CGTGATGGCCTCTAAGGACCCTATGAACGGTGCACGACG

>ITS.15\_C2\_ITS.4-MLZ\_7561rc G04.010-H04.009.complete  
GGAAGTAAAAGTCGTAACAAGGTTTCCGTAGGTGAACCTGCGGAAGGATCATTGTCTGTGA  
CCCTGACCAAATAGACCGTGCACGCGTCATCCAGCCTGCCGGCGGCGGCACCGTTTCGTC  
GCTCGGCCAAGTCCTCGACAACCTCCTCTCCTCGGAGTGGGGGCTCGGGGTAAAAGAACC  
CACGACGCCTAAGGCGTCAAGGAACACTGTGCCTAGCCCGGGGACGCGGACGGCTTGCTG  
GCCGCCCCCGTGCTGCAATGCTATTTAATCCACACGACTCTCGGCAACGGATATCTCGG  
CTCTCGCATCGATGAAGAACGTAGCGAAATGCGATACCTGGTGTGAATTGCAGAATCCCG  
CGAACCATCGAGTCTTTGAACGCAAGTTGCGCCCCGAGGCCATTCGGTTGAGGGCACGCCC  
GCCTGGGCGTCACGCAAAACACGCTCCCACACCCTCATCGGGTAGCGGGACGCGGCATGT  
GGTCCCCCGTAGCGCAAGCTGCGGTGGGCCGAAGATATGGCTGCCGGCGTATCGTGCCGG  
ACACAGCGCGTGGTGGGCGGCTCGCTTTACTTACCGCAGTGCATCCGGGGCGTAGCCGA  
CGTGATGGCCTCTAAGGACCCTTTGAACGGTGCACGACG

>ITS.49\_6\_2\_C2\_ITS.2-MLZ\_7561 C04.014-D04.013. complete  
GGAAGTAAAAGTCGTAACAAGGTTTCCGTAGGTGAACCTGCGGAAGGATCATTGTCTGTGA  
CCCTGACCAAATAGACCGTGCACGCGTCATCCAGCCTGCCGGCGGCGGCACCGTTTCGTC  
GCTCGGCCAAGTCCTCGACAACCTCCTCTCCTCGGAGTGGGGGCTCGGGGTAAAAGAACC  
CACGACGCCTAAGGCGTCAAGGAACACTGTGCCTAGCCCGGGGACGCGGACGGCTTGCTG  
GCCGCCCCCGTGCTGCAATGCTATTTAATCCACACGACTCTCGGCAACGGATATCTCGG  
CTCTCGCATCGATGAAGAACGTAGCGAAATGCGATACCTGGTGTGAATTGCAGAATCCCG  
CGAACCATCGAGTCTTTGAACGCAAGTTGCGCCCCGAGGCCATTCGGTTGAGGGCACGCCC  
GCCTGGGCGTCACGCAAAACACGCTCCCACACCCTCATCGGGTAGCGGGACGCGGCATGT  
GGTCCCCCGTAGCGCAAGCTGCGGTGGGCCGAAGATATGGCTGCCGGCGTATCGTGCCGG  
ACACAGCGCGTGGTGGGCGGCTCGCTTTACTTACCGCAGTGCATCCGGGGCGTAGCCGA  
CGTGATGGCCTCTAAGGACCCTTTGAACGGTGCACGACG

CTCTCGCATCGATGAAGAACGTAGCGAAATGCGATACCTGGTGTGAATTGCAGAATCCCG  
CGAACCATCGAGTCTTTGAACGCAAGTTGCGCCCCGAGGCCATTTCGGCTGAGGGCAGGACT  
GCCTGGGCGTCACGCAAAAACACGCTCCCACCCCCTCATCGGGTAGCGGGACGCGGCATGT  
GGCCCCCGTAGCGCAAGCTGCGGTGGGCCGAAGATATGGCTGCCGGCGTATCGTGCCGG  
ACACAGCGCGTGGTGGGCGACCTCGCTTTACTTACCGCAGTGCATCCGGGGCGTAGCCGA  
CGTGATGGCCTCTAAGGACCCTATGAACGGTGCGCACGACG  
>ITS.49\_6\_2\_ITS.1-MLZ\_7561 B04.015-A04.016 complete  
GGAAGTAAAAGTTCGTAACAAGGTTTCCGTAGGTGAACCTGCGGAAGGATCATTGTCTGTGA  
CCCTGACCAAAATAGACCGCGCACGCGTAATCCAGCCTGCCGGCGATGGCACCGTCCGTC  
GCTCGGCCAAGTCTCGACAACCTCATCTCCTCGGAGTGGGGCTCGGGGTAAAAGAACC  
ACGACGCCTAAGGCGTCAAGGAACACTGTGCCTAGCCCAGGGACGCGGACGGCTTGCTGG  
CCGCCCCCGTGCTGCAATGCTATTTAATCCGACGACTCTCGGCAACGGATATCTCGGC  
TCTCGCATCGATGAAGAACGTAGCGAAATGCGATACCTGGTGTGAATTGCAGAATCCCGC  
GAACCATCGAGTCTTTGAACGCAAGTTGCGCCCCGAGGCCATTTCGGCTGAGGGCAGCCTG  
CCTGGGCGTCACGCAAAAACACGCTCCCACCCCCTCATCGGGTAGCGGGACGCGGCATGTG  
GCCCCCCGTAGCGCAAGCTGCGGTGGGCCGAAGATATGGCTGCCGGCGTGTCTGTGCCGA  
CACAGCGCGTGGTGGGCGACCTCGCTTTACTTACCGCAGTGCATCCGGGGCGTAGCCGAC  
GTGATGGCCTCCAAGGACCCTATGAACGGTGCGCACGACG  
>ITS.12\_6\_2\_C1  
GGAAGTAAAAGTTCGTAACAAGGTTTCCGTAGGTGAACCTGCGGAAGGATCATTGTCTGTGA  
CCCTGACCAAAATAGACCGTGCACGCGTCATCCAGCCTGCCGGCGGGCGGCACCGTTTCGTC  
GCTCGGCCAAGTCTCGACAACCTCCTCTCCTCGGAGTGGGGGCTCGGGGTAAAAGAACC  
CACGACGCCTAAGGCGTCAAGGAACACTGTGCCTAGCCCAGGGACGCGGACGGCTTGCTG  
GCCGCCCCCGTGCTGCAATGCTATTTAATCCACACGACTCTCGGCAACGGATATCTCGG  
CTCTCGCATCGATGAAGAACGTAGCGAAATGCGATACCTGGTGTGAATTGCAGAATCCCG  
CGAACCATCGAGTCTTTGAACGCAAGTTGCGCCCCGAGGCCATTTCGGCTGAGGGCAGCCT  
GCCTGGGCGTCACGCAAAAACACGCTCCCACACCCTCATCGGGTAGCGGGACGCGGCATGT  
GGTCCCCCGTAGCGCAAGCTGCGGTGGGCCGAAGATATGGCTGCCGGCGTATCGTGCCGG  
ACACAGCGCGTGGTGGGCGACCTCGCTTTACTTACCGCAGTGCATCCGGGGCGTAGCCGA  
CGTGATGGCCTCTAAGGACCCTATGAACGGTGCGCACGACG  
>ITS.12\_6\_2\_C2  
GGAAGTAAAAGTTCGTAACAAGGTTTCCGTAGGTGAACCTGCGGAAGGATCATTGTCTGTGA  
CCCTGACCAAAATAGACCGTGCACGCGTCATCCAGCCTGCCGGCGGGCGGCACCGTTTCGTC  
GCTCGGCCAAGTCTCGACAACCTCCTCTCCTCGGAGTGGGGGCTCGGGGTAAAAGAACC  
CACGACGCCTAAGGCGTCAAGGAACACTGTGCCTAGCCCAGGGACGCGGACGGCTTGCTG  
GCCGCCCCCGTGCTGCAATGCTATTTAATCCACACGACTCTCGGCAACGGATATCTCGG  
CTCTCGCATCGATGAAGAACGTAGCGAAATGCGATACCTGGTGTGAATTGCAGAATCCCG  
CGAACCATCGAGTCTTTGAACGCAAGTTGCGCCCCGAGGCCATTTCGGCTGAGGGCAGCCT  
GCCTGGGCGTCACGTAAAAACACGCTCCCACACCCTCATCGGGTAGCGGGACGCGGCATGT  
GGTCCCCCGTAGCGCAAGCTGCGGTGGGCCGAAGATATGGCTGCCGGCGTATCGTGCCGG  
ACACAGCGCGTGGTGGGCGACCTCGCTTTACTTACCGCAGTGCATCCGGGGCGTAGCCGA  
CGTGATGGCCTCTAAGGACCCTATGAACGGTGCGCACGACG  
>ITS.12\_6\_2\_C3  
GGAAGTAAAAGTTCGTAACAAGGTTTCCGTAGGTGAACCTGCGGAAGGATCATTGTCTGTGA  
CCCTGACCAAAATAGACCGTGCACGCGTCATCCAGCCTGCCGGCGGGCGGCACCGTTTCGTC  
GCTCGGCCAAGTCTCGACAACCTCCTCTCCTCGGAGTGGGGGCTCGGGGTAAAAGAACC  
CACGACGCCTAAGGCGTCAAGGAACACTGTGCCTAGCCCAGGGACGCGAACGGCTTGCTG  
GCCGCCCCCGTGCTGCAATGCTATTTAATCCACACGACTCTCGGCAACGGATATCTCGG  
CTCTCGCATCGATGAAGAACGTAGCGAAATGCGATACCTGGTGTGAATTGCAGAATCCCG  
CGAACCATCGAGTCTTTGAACGCAAGTTGCGCCCCGAGGCCATTTCGGCTGAGGGCAGCCT  
GCCTGGGCGTCACGCAAAAACACGCTCCCACACCCTCATCGGGTAGCGGGACGCGGCATGT  
GGTCCCCCGTAGCGCAAGCTGCGGTGGGCCGAAGATATGGCTGCCGGCGTATCGTGCCGG  
ACACAGCGCGTGGTGGGCGACCTCGCCTTACTTACCGCAGTGCATCCGGGGCGTAGCCGA  
CGTGATGGCCTCTAAGGACCCTTTGAACGGTGCGCACGACG

>ITS.12\_6\_2\_C4

GGAAGTAAAAGTTCGTAACAAGGTTTCCGTAGGTGAACCTGCGGAAGGATCATTGTTCGTGA  
CCCTGACCAAATAGACCGTGCACGCGTCATCCAGCCTGCCGGCGGCGGCACCGTTTCGTC  
GCTCGGCCAAGTTCCTCGACAACCTCCTCTCCTCGGAGTGGGGGCTCGGGGTAAAAGAACC  
CACGACGCCTAAGGCGTCAAGGAACACTGTGCCTAGCCCGGGGACGCGGACGGCTTGCTG  
GCCGCCCCCGTGCTGCAATGCTATTTAATCCACACGACTCTCGGCAACGGATATCTCGG  
CTCTCGCATCGATGAAGAACGTAGCGAAATGCGATACCTGGTGTGAATTGCAGAATCCCG  
CGAACCATCGAGTCTTTGAACGCAAGTTGCGCCCCGAGGCCACTCGGCTGAGGGCACGCCT  
GCCTGGGCGTACGCAAAAACAGCTCCCACACCCTCATCGGGTAGCGGGACGCGGCATGT  
GGTCCCCCGTAGCGCAAGCTGCGGTGGGCCGAAGATATGGCTGCCGGCGTATCGTGCCGG  
ACACAGCGCGTGGTGGGCGACCTCGCTTTACTTACCGCAGTGCATCCGGGGCGTAGCCGA  
CGTGATGGCCTCTAAGGACCCTATGAACGGTGCACACGACG

>ITS.12\_6\_2\_C5

GGAAGTAAAAGTTCGTAACAAGGTTTCCGTAGGTGAACCTGCGGAAGGATCATTGTTCGTGA  
CCCTGACCAAATAGACCGTGCACGCGTCATCCAGCCTGCCGGCGGCGGCACCGCTTCGTC  
GCTCGGCCAAGTTCCTCGACAACCTCCTCTCCTCGGAGTGGGGGCTCGGGGTAAAAGAACC  
CACGACGCCTAAGGCGTCAAGGAACACTGTGCCTAGCCCGGGGACGCGGACGGCTTGCTG  
GCCGCCCCCTCGTGCTGCAAGGCTATTTAATCCACACGACTCTCGGCAACGGATATCTCGG  
CTCTCGCATCGATGAAGAACGTAGCGAAATGCGATACCTGGTGTGAATTGCAGAATCCCG  
CGAACCATCGAGTCTTTGAACGCAAGTTGCGCCCCGAGGCCATTCGGCTGAGGGCACGCCT  
GCCTGGGCGTACGTA AAAACAGCTCCCACACCCTCATCGGGTAGCGGGACGCGGCATGT  
GGTCCCCCGTAGCGCAAGCTGCGGTGGGCCGAAGATATGGCTGCCGGCGTATCGTGCCGG  
ACACAGCGCGTGGTGGGCGACCTCGCTTTACTTACCGCAGTGCATCCGGGGCGTAGCCGA  
CGTGATGGCCTCTAAGGACCCTTTGAACGGTGCACACGACG

>ITS.12\_6\_2\_C6

GGAAGTAAAAGTTCGTAACAAGGTTTCCGTAGGTGAACCTGCGGAAGGATCATTGTTCATGA  
CCCTGACCAAATAGACCGTGCACGCGTCATCCAGCCTGCCGGCGGCGGCACCGTTTCGTC  
GCTCGGCCAAGTTCCTCGACAACCTCCTCTCCTCGGAGTGGGGGCTCGGGGTAAAAGAACC  
CACGACGCCTAAGGCGTCAAGGAACACTGTGCCTAGCCCGGGGACGCGGACGGCTTGCTG  
GCCGCCCCCGTGCTGCAATGCTATTTAATCCACACGACTCTCGGCAACGGATATCTCGG  
CTCTCGCATCGATGAAGAACGTAGCGAAATGCGATACCTGGTGTGAATTGCAGAATCCCG  
CGAACCATCGAGTCTTTGAACGCAAGTTGCGCCCCGAGGCCATTCGGCTGAGGGCACGCCT  
GCCTGGGCGTACGCAAAAACAGCTCCCACACCCTCATCGGGTAGCGGGACGCGGCATGT  
GGTCCCCCGTAGCGCAAGCTGCGGTGGGCCGAAGATATGGCTGCCGGCGTATCGTGCCGG  
ACACAGCGCGTGGTGGGCGACCTCGCTTTACTTACCGCAGTGCATCCGGGGCGTAGCCGA  
CGTGATGGCCTCTAAGGACCCTATGAACGGTGCACACGACG

>ITS.12\_6\_2\_C7

GGAAGTAAAAGTTCGTAACAAGGTTTCCGTAGGTGAACCTGCGGAAGGATCATTGTTCGTGA  
CCCTGACCAAATAGACCGTGCACGCGTCATCCAGCCTGCCGGCGGCGGCACCGTTTCGTC  
GCTCGGCCAAGTTCCTCGACAACCTCCTCTCCTCGGAGTGGGGGCTCGGGGTAAAAGAACC  
CACGACGCCTAAGGCGTCAAGGAACACTGTGCCTAGCCCGGGGACGCGGACGGCTTGCTG  
GCCGCCCCCGTGCTGCAATGCTATTTAATCCACACGACTCTCGGCAACGGATATCTCGG  
CTCTCGCATCGATGAAGAACGTAGCGAAATGCGATACCTGGTGTGAATTGCAGAATCCCG  
CGAACCATCGAGTCTTTGAACGCAAGTTGCGCCCCGAGGCCATTCGGCTGAGGGCACGCCT  
GCCTGGGCGTACGCAAAAACAGCTCCCACACCCTCATCGGGTAGCGGGACGCGGCATGT  
GGTCCCCCGTAGCGCAAGCTGCGGTGGGCCGAAGATATGGCTGCCGGCTTATCGTGCCGG  
ACACAGCGCGTGGTGGGCGACCTCGCTTTACTTACCGCAGTGCATCCGGGGCGTAGCCGA  
CGTGATGGCCTCTAAGGACCCTTTGAACGGTGCACACGACG

>ITS.12\_6\_2\_C8

GGAAGTAAAAGTTCGTAACAAGGTTTCCGTAGGTGAACCTGCGGAAGGATCATTGTTCGTGA  
CCCTGACCAAATAGACCGTGCACGCGTCATCCAGCCTGCCGGCGGCGGCACCGTTTCGTC  
GCTCGGCCAAGTTCCTCGACAACCTCCTCTCCTCGGAGTGGGGGCTCGGGGTAAAAGAACC  
CACGACGCCTAAGGCGTCAAGGAACACTGTGCCTAGCCCGGGGACGCGGACGGCTTGCTG  
GCCGCCCCCGTGCTGCAATGCTATTTAATCCACACGACTCTCGGCAACGGATACCTCGG  
CCC

CTCTCGCATCGATGAAGAACGTAGCGAAATGCGATACCTGGTGTGAATTGCAGAATCCCG  
CGAACCATCGAGTCTTTGAACGCAAGTTGCGCCCCGAGGCCATTCGGCTGAGGGCACGCC  
GCCTGGGCGTCACGCAAAACACGCTCCCACACCCTCATCGGGTAGAGGGACGCGGCATGT  
GGTCCCCCGTAGCGCAAGCTGCGGTGGGCCGAAGATATGGCTGCCGGCGTATCGTGCCGG  
ACACAGCGCGTGGTGGGCGACCTCGCTTTACTTACCGCAGTGCATCCGGGGCGTAGCCAA  
CGTGATGGCCTCTAAGGACCCTATGAACGGTGCACGACG

>ITS.12\_8\_2\_C1

GGAAGTAAAAGTTCGTAACAAGGTTTCCGTAGGTGAACCTGCGGAAGGATCATTGTTCGTGA  
CCCTGACCAAATAGACCGTGCACGCGTCATCCAGCCTGCCGGCGGGCACCCTTCGTC  
GCTCGGCCAAGTCTCGACAACCTCCTCTCCTCGGAGTGGGGGCTCGGGGTAAAAGAACC  
CACGACGCCTAAGGCGTCAAGGAACACTGTGCCTAGCCCGGGGACGCGGACGGCTTGCTG  
GCCGCCCCCGTGTGCAATGCTATTTAATCCACACGACTCTCGGCAACGGATATCTCG  
GCTCTCGCATCGATGAAGAACGTAGCGAAATGCGATACCTGGTGTGAATTGCAGAATCCC  
GCGAACCATCGAGTCTTTGAACGCAAGTTGCGCCCCGAGGCCATTCGGCTGAGGGCACGCC  
TGCTGGGCGTCACGCAAAACACGCTCCCACACCCTCATCGGGTAGCGGGACGCGGCATG  
TGGTCCCCCGTAGCGCAAGCTGCGGTGGGCCGAAGATATGGCTGCCGGCGTATCGTGCCG  
GACACAGCGCGTGGTGGGCGACCTCGCTTTACTTACCGCAGTGCATCCGGGGCGTAGCCG  
ACGTGATGGCCTCTAAGGACCCTATGAACGGTGCACGACG

>ITS.12\_8\_2\_C2

GGAAGTAAAAGTTCGTAACAAGGTTTCCGTAGGTGAACCTGCGGAAGGATCATTGTTCGTGA  
CCCTGACCAAATAGACCGTGCACGCGTCATCCAGCCTGCCGGCGGGCACCCTTCGTC  
GCTCGGCCAAGTCTCGACAACCTCCTCTCCTCGGAGTGGGGGCTCGGGGTAAAAGAACC  
CACGACGCCTAAGGCGTCAAGGAACACTGTGCCTAGCCCGGGGACGCGGACGGCTTGCTG  
GCCGCCCCCGTGTGCAATGCTATTTAATCCACACGACTCTCGGCAACGGATATCTCGG  
CTCTCGCATCGATGAAGAACGTAGCGAAATGCGATACCTGGTGTGAATTGCAGAATCCCG  
CGAACCATCGAGTCTTTGAACGCAAGTTGCGCCCCGAGGCCATTCGGCTGAGGGCACGCC  
GCCTGGGCGTCACGCAAAACACGCTCCCACACCCTCATCGGGTAGCGGGACGCGGCATGT  
GGTCCCCCGTAGCGCAAGCTGCGGTGGGCCGAAGATATGGCTGCCGGCGTATCGTGCCGG  
ACACAGCGCGTGGTGGGCGACCTCGCTTTACTTACCGCAGTGCATCCGGGGCGTAGCCG  
CGTGATGGCCTCTAAGGACCCTTTGAACGGTGCACGACG

>ITS.12\_8\_2\_C3

GGAAGTAAAAGTTCGTAACAAGGTTTCCGTAGGTGAACCTGCGGAAGGATCATTGTTCGTGA  
CCCTGACCAAATAGACCGTGCACGCGTCATCCAGCCTGCCGGCGGGCACCCTTCGTC  
GCTCGGCCAAGTCTCGACAACCTCCTCTCCTCGGAGTGGGGGCCCCGGGGTAAAAGAACC  
CACGACGCCTAAGGCGTCAAGGAACACTGTGCCTAGCCCGGGGACGCGGACGGCTTGCTG  
GCCGCCCCCGTGTGCAATGCTATTTAATCCACACGACTCTCGGCAACGGATATCTCGG  
CTCTCGCATCGATGAAGAACGTAGCGAAATGCGATACCTGGTGTGAATTGCAGAATCCCG  
CGAACCATCGAGTCTTTGAACGCAAGTTGCGCCCCGAGGCCATTCGGCTGAGGGCACGCC  
GCCTGGGCGTCACGCAAAACACGCTCCCACACCCTCATCGGGTAGCGGGACGCGGCATGT  
GGTCCCCCGTAGCGCAAGCTGCGGTGGGCCGAAGATATGGCTGCCGGCGTATCGTGCCGG  
ACACAGCGCGTGGTGGGCGACCTCGCTTTACTTACCGCAGTGCATCCGGGGCGTAGCCG  
CGTGATGGCCTCTAAGGACCCTTTGAACGGTGCACGACG

>ITS.12\_8\_2\_C4

GGAAGTAAAAGTTCGTAACAAGGTTTCCGTAGGTGAACCTGCGGAAGGATCATTGTTCGTGA  
CCCTGACCAAATAGACCGTGCACGCGTCATCCAGCCTGCCGGCGGGCACCCTTCGTC  
GCTCGGCCAAGTCTCGACAACCTCCTCTCCTCGGAGTGGGGGCTCGGGGTAAAAGAACC  
CACGACGCCTAAGGCGTCAAGGAACACTGTGCCTAGCCCGGGGACGCGGACGGCTTGCTG  
GCCGCCCCCGTGTGCAATGCTATTTAATCCACACGACTCTCGGCAACGGATATCTCGG  
CTCTCGCATCGATGAAGAACGTAGCGAAATGCGATACCTGGTGTGAATTGCAGAATCCCG  
CGAACCATCGAGTCTTTGAACGCAAGTTGCGCCCCGAGGCCATTCGGCTGAGGGCACGCC  
GCCTGGGCGTCACGCAAAACACGCTCCCACACCCTCATCGGGTAGCGGGACGCGGCATGT  
GGTCCCCCGTAGCGCAAGCTGCGGTGGGCCGAAGATATGGCTGCCGGCGTATCGTGCCGG  
ACACAGCGCGTGGTGGGCGACCTCGCTTTACTTACCGCAGTGCATCCGGGGCGTAGCCG  
CATGATGGCCTCTAAGGACCCTTTGAACGGTGCACGACG

>ITS.12\_8\_2\_C5

GGAAGTAAAAGTCGTAAACAAGGTTTCCGTAGGTGAACCTGCGGAAGGATCATTGTTCGTGA  
CCCTGACCAAATAGACCGTGCACGCGTCATCCAGCCTGCCGGCGGCGGCACCGTTTCGTC  
GCTCGGCCAAGTCCTCGACAACCTCCTCTCCTCGGAGTGGGGGCTCGGGGTAAAAGAACC  
CACGACGCCTAAGGCGTCAAGGAACACTGTGCCTAGCCCGGGGACGCGGACGGCTTGCTG  
GCCGCCCTCGTGCTGCAATGCTATTTAATCCACACGACTCTCGGCAACGGATATCTCGG  
CTCTCGCATCGATGAAGAACGTAGCGAAATGCGATACCTGGTGTGAATTGCAGAATCCCG  
CGAACCATCGAGTCTTTGAACGCAAGTTGCGCCCCGAGGCCATTCGGCTGAGGGCACGCCT  
GCCTGGGCGTACGCAAAAACAGCTCCCACACCCTCATCGGGTAGCGGGACGCGGCATGT  
GGTCCCCCGTAGCGCAAGCTGCGGTGGGCCGAAGATATGGCTGCCGGCGTATCGTGCCGG  
ACACAGCGCGTGGTGGGCGACCTCGCTTTACTTACCGCAGTGCATCCGGGGCGTAGCCGA  
CGTGATGGCCTCTAAGGACCCCTATGAACGGTGCACACGACG

>ITS.12\_8\_2\_C8

GGAAGTAAAAGTCGTAAACAAGGTTTCCGTAGGTGAACCTGCGGAAGGATCATTGTTCGTGA  
CCCTGACCAAATAGACCGTGCACGCGTCATCCAGCCTGCCGGCGGCGGCACCGTTTCGTC  
GCTCGGCCAAGTCCTCGACAACCTCCTCTCCTCGGAGTGGGGGCTCGGGGTAAAAGAACC  
CACGACGCCTAAGGCGTCAAGGAACACTGTGCCTAGCCCGGGGACGCGGACGGCTTGCTG  
GCCGCCCTCGTGCTGCAATGCTATTTAATCCACACGACTCTCGGCAACGGATATCTCGG  
CTCTCGCATCGATGAAGAACGTAGCGAAATGCGATACCTGGTGTGAATTGCAGAATCCCG  
CGAACCATCGAGTCTTTGAACGCAAGTTGCGCCCCGAGGCCATTCGGCTGAGGGCACGCCT  
GCCTGGGCGTACGCAAAAACAGCTCCCACACCCTCATCGGGTAGCGGGACGCGGCATGT  
GGTCCCCCGTAGCGCAAGCTGCGGTGGGCCGAAGATATGGCTGCCGGCGTATCGTGCCGG  
ACACAGCGCGTGGTGGGCGACCTCGCTTTACTTACCGCAGTGCATCCGGGGCGTAGCCGA  
CGTGATGGCCTCTAAGGACCCCTATGAACGGTGCACACGACG

>ITS.12\_8\_2\_C9

GGAAGTAAAAGTCGTAAACAAGGTTTCCGTAGGTGAACCTGCGGAAGGATCATTGTTCGTGA  
CCCTGACCAAATAGACCGTGCACGCGTCATCCAGCCTGCCGGCGACGGCACCGTTTCGTC  
GCTCGGCCAAGTCCTCGACAACCTCCTCTCCTCGGAGTGGGGGCTCGGGGTAAAAGAACC  
CACGACGCCTAAGGCGTCAAGGAACACTGTGCCTAGCCCGGGGACGCGGACGGCTTGCTG  
GCCGCCCTCGTGCTGCAATGCTATTTAATCCACACGGCTCTCGGCAACGGATATCTCGG  
CTCTCGCATCGATGAAGAACGTAGCGAAATGCGATACCTGGTGTGAATTGCAGAATCCCG  
CGAACCATCGAGTCTTTGAACGCAAGTTGCGCCCCGAGGCCATTCGGCTGAGGGCACGCCT  
GCCTGGGCGTACGCAAAAACAGCTCCCACACCCTCATCGGGTAGCGGGACGCGGCATGT  
GGTCCCCCGTAGCGCAAGCTGCGGTGGGCCGAAGATATGGCTGCCGGCGTATCGTGCCGG  
ACACAGCGCGTGGTGGGCGACCTCGCTTTACTTACCGCAGTGCATCCGGGGCGTAGCCGA  
CGTGATGGCCTCTAAGGACCCCTTTGAACGGTGCACACGACG

>ITS.12\_8\_2\_C10

GGAAGTAAAAGTCGTAAACAAGGTTTCCGTAGGTGAACCTGCGGAAGGATCATTGTTCGTGA  
CCCTGACCAAATAGACCGTGCACGCGTCATCCAGCCTGCCGGCGGCGGCACCGTTTCGTC  
GCTCGGCCAAGTCCTCGACAACCTCCTCTCCTCGGAGTGGGGGCTCGGGGTAAAAGAACC  
CACGACGCCTAAGGCGTCAAGGAACACTGTGCCTAGCTCGGGGACGCGGACGGCTTGCTG  
GCCGCCCTCGTGCTGCAATGCTATTTAATCCACACGACTCTCGGCAACGGATATCTCGG  
CTCTCGCATCGATGAAGAACGTAGCGAAATGCGATACCTGGTGTGAATTGCAGAATCCCG  
CGAACCATCGAGTCTTTGAACGCAAGTTGCGCCCCGAGGCCATTCGGCTGAGGGCACGCCT  
GCCTGGGCGTACGTA AAAACAGCTCCCACACCCTCATCGGGTAGCGGGACGCGGCATGT  
GGTCCCCCGTAGCGCAAGCTGCGGTGGGCCGAAGATATGGCTGCCGGCGTATCGTGCCGG  
ACACAGCGCGTGGTGGGCGACCTCGCTTTACTTACCGTAGTGCATCCGGGGCGTAGCCGA  
CGTGATGGCCTCTAAGGACCCCTTTGAACGGTGCACACGACG

>ITS.13\_3\_C1Frc

GGAAGTAAAAGTCGTAAACAAGGTTTCCGTAGGTGAACCTGCGGAAGGATCATTGTTCGTGA  
CCCTGACCAAATAGACCGTGCACGCGTCATCCAGCCC GCCGGCGGCGGCACCGTTTCGTC  
GCTCGGCCAAGTCCTCGACAACCTCCTCTCCTCGGAGTGGGGGCTCGGGGTAAAAGAACC  
CACGACGCCTAAGGCGTCAAGGAACACTGTGCCTAGCCCGGGGACGCGGACGGCTTGCTG  
GCCGCCCTCGTGCTGCAATGCTATTTAATCCACACGACTCTCGGCAACGGATATCTCGG  
CTCTCGCATCGATGAAGAACGTAGCGAAATGCGATACCTGGTGTGAATTGCAGAATCCCG  
CGAACCATCGAGTCTTTGAACGCAAGTTGCGCCCCGAGGCCATTCGGCTGAGGGCACGCCT  
GCCTGGGCGTACGTA AAAACAGCTCCCACACCCTCATCGGGTAGCGGGACGCGGCATGT  
GGTCCCCCGTAGCGCAAGCTGCGGTGGGCCGAAGATATGGCTGCCGGCGTATCGTGCCGG  
ACACAGCGCGTGGTGGGCGACCTCGCTTTACTTACCGTAGTGCATCCGGGGCGTAGCCGA  
CGTGATGGCCTCTAAGGACCCCTTTGAACGGTGCACACGACG

CTCTCGCATCGATGAAGAACGTAGCGAAATGCGATACCTGGTGTGAATTGCCGAATCCCG  
CGAACCATCGAGTCTTTGAACGCAAGTTGCGCCCCGAGGCCATTCGGCTGAGGGCACGCCT  
GCCTGGGCGTCACGCAAAAACACGCTCCCACACCCTCATCGGGTAGCGGGACGCGGCATGT  
GGTCCCCCGTAGCGCAAGCTGCGGTGGGCCGAAGATATGGCTGCCGGCGTATCGTGCCGG  
ACACAGCGCGTGGTGGGCGACCTCGCTTTACTTACCGCAGTGCATCCGGGGCGTAGCCGA  
CGTGATGGCCTCTAAGGACCCTATGAACGGTGCACGACG

>ITS.13\_3\_C2

GGAAGTAAAAGTCGTAACAAGGTTTCCGTAGGTGAACCTGCGGAAGGATCATTGTCTGTGA  
CCCTGACCAAATAGACCGTGCACGCGTCATCCACCCTGCCGGCGGGCACCCTTCGTC  
GCTCGGCCAAGTCTCGACAACCTCCTCTCCTCGGAGTGGGGGCTCGGGGTAAAAGAACC  
CACGACGCCTAAGGCGTCAAGGAACACTGTGCCTAGCCGGGGACGCGGACGGCTTGCTG  
GCCGCCCCCGTGCTGCAATGCTATTTAATCCACACGACTCTCGGCAACGGATATCTCGG  
CTCTCGCATCGATGAAGAACGTAGCGAAATGCGATACCTGGTGTGAATTGCAGAATCCCG  
CGAACCATCGAGTCTTTGAACGCAAGTTGCGCCCCGAGGCCATTCGGCTGAGGGCACGCCT  
GCCTGGGCGTCACGCAAAAACACGCTCCCACACCCTCATCGGGTAGCGGGACGCGGCATGT  
GGTCCCCCGTAGCGCAAGCTGCGGTGGGCCGAAGATATGGCTGCCGGCGTATCGTGCCGG  
ACACAGCGCGTGGTGGGCGACCTCGCTTTACTTACCGCAGTGCATCCGGGGCGTAGCCGA  
CGTGATGGCCTCTAAGGACCCTATGAACGGTGCACGACG

>ITS.13\_3\_C3F

GGAAGTAAAAGTCGTAACAAGGTTTCCGTAGGTGAACCTGCGGAAGGATCATTGTCTGTGA  
CCCTGACCAAATAGACCGTGCACGCGTCATCCAGCCTGCCGGCGGGCACCCTTCGTC  
GCTCGGCCAAGTCTCGACAACCTCCTCTCCTCGGAGTGGGGGCTCGGGGTAAAAGAACC  
CACGACGCCTAAGGCGTCAAGGAACACTGTGCCTAGCCGGGGACGCGGACGGCTTGCTG  
GCCGCCCCCTCGTGCTGCAATGCTATTTAATCCACACGACTCTCGGCAACGGATATCTCGG  
CTCTCGCATCGATGAAGAACGTAGCGAAGTGCATACCTGGTGTGAATTGCAGAATCCCG  
CGAACCATCGAGTCTTTGAACGCAAGTTGCGCCCCGAGGCCATTCGGCTGAGGGCACGCCT  
GCCTGGGCGTCACGCAAAAACACGCTCCCACACCCTCATCGGGTAGCGGGACGCGGCATGT  
GGTCCCCCGTAGCGCAAGCTGCGGTGGGCCGAAGATATGGCTGCCGGCGTATCGTGCCGG  
ACACAGCGCGTGGTGGGCAACCTCGCTTTACTTACCGCAGTGCATCCGGGGCGTAGCCGA  
CGTGATGGCCTCTAAGGACCCTATGAACGGTGCACGACG

>ITS.13\_3\_C6Frc

GGAAGTAAAAGTCGTAACAAGGTTTCCGTAGGTGAACCTGCGGAAGGATCATTGTCTGTGA  
CCCTGACCAAATAGACCGTGCACGCGTCATCCAGCCTGCCGGCGGGCACCCTTCGTC  
GCTCGGCCAAGTCTCGACAACCTCCTCTCCTCGGAGTGGGGGCTCGGGGTAAAAGAACC  
CACGACGCCTAAGGCGTCAAGGAACACTGTGCCTAGCCGGGGACGCGGACGGCTTGCTG  
GCCGCCCCCGTGCTGCAATGCTATTTAATCCACACGACTCTCGGCAACGGATATCTCGG  
CTCTCGCATCGATGAAGAACGTAGCGAAATGCGATACCTGGTGTGAATTGCAGAATCCCG  
CGAACCATCGAGTCTTTGAACGCAAGTTGCGCCCCGAGGCCATTCGGTTGAGGGCACGCCT  
GCCTGGGCGTCACGCAAAAACACGCTCCCACACCCTCATCGGGTAGCGGGACGCGGCATGT  
GGTCCCCCGTAGCGCAAGCTGCGGTGGGCCGAAGATATGGCTGCCGGCGTATCGTGCCGG  
ACACAGCGCGTGGTGGGCAACCTCGCTTTACTTACCGCAGTGCATCCGGGGCGTAGCCGA  
CGTGATGGCCTCTAAGGACCCTATGAACGGTGCACGACG

>ITS.13\_3\_C7Frc

GGAAGTAAAAGTCGTAACAAGGTTTCCGTAGGTGAACCTGCGGAAGGATCATTGTCTGTGA  
CCCTGACCAAATAGACCGTGCACGCGTCATCCAGCCTGCCGGCGGGCACCCTTCGTC  
GCTCGGCCAAGTCTCGACAACCTCCTCTCCTCGGAGTGGGGGCTCGGGGTAAAAGAACC  
CACGACGCCTAAGGCGTCAAGGAACACTGTGCCTAGCCGGGGACGCGGACGGCTTGCTG  
GCCGCCCCCTCGTGCTGCAATGCTATTTAATCCACACGACTCTCGGCAACGGATATCTCGG  
CTCTCGCATCGATGAAGAACGTAGCGAAATGCGATACCTGGTGTGAATTGCAGAATCCCG  
CGAACCATCGAGTCTTTGAACGCAAGTTGCGCCCCGAGGCCATTCGGCTGAGGGCACGCCT  
GCCTGGGCGTCACGCAAAAACACGCTCCCACACCCTCATCGGGTAGCGGGACGCGGCATGT  
GGTCCCCCGTAGCGCAAGCTGCGGTGGGCCGAAGATATGGCTGCCGGCGTATCGTGCCGG  
ACACAGCGCGTGGTGGGCGACCTCGCTTTACTTACCGCAGTGCATCCGGGGCGTAGCCGA  
CGTGATGGCCTCTAAGGACCCTTTGAACGGTGCACGACG



>ITS.13\_3\_C8Frc

GGAAGTAAAAGTCGTAACAAGGTTTCCGTAGGTGAACCTGCGGAAGGATCATTGTTCGTGA  
CCCTGACCAAATAGACCGTGCACGCGTCATCCAGCTTGCCGGCGGCGGCACCGTTTCGTG  
GCTCGGCCAAGTCCTCGACAACCTCCTCTCCTCGGAGTGGGGGCTCGGGGTAAAAGAACC  
CACGACGCCTAAGGCGTCAAGGAACACTGTGCCTAGCTCGGGGACGCGGACGGCTTGCTG  
GCCGCCCTCGTGCTGCAATGCTATTTAATCCACACGACTCTCGGCAACGGATATCTCGG  
CTCTCGCATTGATGAAGAACGTAGCGAAATGCGATACTGGTGTGAATTGCAGAATCCCG  
CGAACCATCGAGTCTTTGAACGCAAGTTGCGCCCCGAGGCCATTCGGCTGAGGGCACGCCT  
GCCTGGGCGTCACGCAAAACACGCTCCCACACCCTCATCGGGTAGCGGGACGCGGCATGT  
GGTCCCCCGTAGCGCAAGCTGCTGTGGGCCGAAGATATGGCTGCCGGCGTATCGTGCCGG  
ACACAGCGCGTGGTGGGCGACCTCGCTTTACTTACCGCAGTGCATCCGGGGCGTAGCCGA  
CGTGATGGCCTCTAAGGACCCTATGAACGGTGCACACGACG

>ITS.13\_3\_C9

GGAAGTAAAAGTCGTAACAAGGTTTCCGTAGGTGAACCTGCGGAAGGATCATTGTTCGTGA  
CCCTGACCAAATAGACCGAGCAGCGTCATCCAGCCTGCCGGCGGCGGCACCGTTTCGTG  
GCTCGGCCAAGTCCTCGACAACCTCCTCTCCTCGGAGTGGGGGCTCGGGGTAAAAGAACC  
CACGACGCCTAAGGCGTCAAGGAACACTGTGCCTAGCCGGGGACGCGGACGGCTTGCTG  
GCCGCCCCCCGTGCTGCAATGCTATTTAATCCACACGACTCTCGGCAACGGATATCTCGG  
CTCTCGCATCGATGAAGAACGTAGCGAAATGCGATACTGGTGTGAATTGCAGAATCCCG  
CGAACCATCGAGTCTTTGAACGCAAGTTGCGCCCCGAGGCCATTCGGCTGAGGGCACGCCT  
GCCTGGGCGTCACGCAAAACACGCTCCCACACCCTCATCGGGTAGCGGGACGCGGCATGT  
GGTCCCCCGTAGCGCAAGCTGCGGTGGGCCGAAGATATGGCTGCCGGCGTATCGTGCCGG  
ACACAGCGCGTGGTGGGCGACCTCGCTTTACTTACCGCAGTGCATCCGGGGCGTAGCCGA  
CGTGATGGCCTCTAAGGACCCTATGAACGGTGCACACGACG

>ITS.13\_3\_C10F

GGAAGTAAAAGTCGTAACAAGGTTTCCGTAGGTGAACCTGCGGAAGGATCATTGTTCGTGA  
CCCTGACCAAATAGACCGTGCACGCGTCATCCACCCTGCCGGCGGCGGCACCGTTTCGTG  
GCTCGGCCAAGTCCTCGACAACCTCCTCTCCTCGGAGTGGGGGCTCGGGGTAAAAGAACC  
CACGACGCCTAAGGCGTCAAGGAACACTGTGCCTAGCCGGGGACGCGGACGGCTTGCTG  
GCCGCCCCCCGTGCTGCAATGCTATTTAATCCACACGACTCTCGGCAACGGATATCTCGG  
CTCTCGCATCGATGAAGAACGTAGCGAAATGCGATACTGGTGTGAATTGCAGAATCCCG  
CGAACCATCGAGTCTTTGAACGCAAGTTGCGCCCCGAGGCCATTCGGCTGAGGGCACGCCT  
GCCTGGGCGTCACGCAAAACACGCTCCCACACCCTCATCGGGTAGCGGGACGCGGCATGT  
GGTCCCCCGTAGCGCAAGCTGCGGTGGGCCGAAGATATGGCTGCCGGCGTATCGTGCCGG  
ACACAGCGCGTGGTGGGCGACCTCGCTTTACTTACCGCAGTGCATCCGGGGCGTAGCCGA  
CGTGATGGCCTCTAAGGACCCTTTGAACGGTGCACACGACG

>ITS.13\_4\_3\_C1Frc

GGAAGTAAAAGTCGTAACAAGGTTTCCGTAGGTGAACCTGCGGAAGGATCATTGTTCGTGA  
CCCTGACCAAATAGACCGTGCACGCGTCATCCAGCCTGCCGGCGGCGGCACCGTTTCGTG  
GCTCGGCCAAGTCCTCGACAACCTCCTCTCCTCGGAGTGGGGGCTCGGGGTAAAAGAACC  
CACGACGCCTAAGGCGTCAAGGAACACTGTGCCTAGCCGGGGACGCGGACGGCTTGCTG  
GCCGCCCCCCGTGCTGCAATGCTATTTAATCCACACGACTCTCGGCAACGGATATCTCGG  
CTCTCGCATCGATGAAGAACGTAGCGAAATGCGATACTGGTGTGAATTGCAGAATCCCG  
CGAACCATCGAGTCTTTGAACGCAAGTTGCGCCCCGAGGCCATTCGGCTGAGGGCACGCCT  
GCCTGGGCGTCACGCAAAACACGCTCCCACACCCTCATCGGGTAGCGGGACGCGGCATGT  
GGTCCCCCGTAGCGCAAGCTGCGGTGGGCCGAAGATATGGCTGCCGGCGTATCGTGCCGG  
ACACAGCGCGTGGTGGGCGACCTCGCTTTACTTACCGCAGTGCATCCGGGGCGTAGCCGA  
CGTGATGGCCTCTAAGGACCCTTTGAACGGTGCACACGACG

>ITS.13\_4\_3\_C3F

GGAAGTAAAAGTCGTAACAAGGTTTCCGTAGGTGAACCTGCGGAAGGATCATTGTTCGTGA  
CCCTGACCAAATAGACCGTGCACGCGTCATCCAGCCTGCCGGCGGCGGCACCGTTTCGTG  
GCTCGGCCAAGTCCTCGACAACCTCCTCTCCTCGGAGTGGGGGCTCGGGGTAAAAGAACC  
CACGACGCCTAAGGCGTCAAGGAACACTGTGCCTAGCCGGGGACGCGGACGGCTTGCTG  
GCCGCCCTCGTGCTGCAATGCTATTTAATCCACACGACTCTCGGCAACGGATATCTCGG  
CTCTCGCATTGATGAAGAACGTAGCGAAATGCGATACTGGTGTGAATTGCAGAATCCCG  
CGAACCATCGAGTCTTTGAACGCAAGTTGCGCCCCGAGGCCATTCGGCTGAGGGCACGCCT  
GCCTGGGCGTCACGCAAAACACGCTCCCACACCCTCATCGGGTAGCGGGACGCGGCATGT  
GGTCCCCCGTAGCGCAAGCTGCGGTGGGCCGAAGATATGGCTGCCGGCGTATCGTGCCGG  
ACACAGCGCGTGGTGGGCGACCTCGCTTTACTTACCGCAGTGCATCCGGGGCGTAGCCGA  
CGTGATGGCCTCTAAGGACCCTTTGAACGGTGCACACGACG

CTCTCGCATCGATGAAGAACGTAGCGAAATGCGATACCTGGTGTGAATTGCAGAATCCCG  
CGAACCATCGAGTCTTTGAACGCAAGTTGCGCCCCGAGGCCATTCGGCTGAGGGCACGCCT  
GCCTGGGCGTCACGTA AAAACACGCTCCCACACCCTCATCGGGTAGCGGGACGCGGCTTGT  
GGTTCCCCGTAGCGCAAGCTGCGGTGGGCCGAAGATATGGCTGCCGGCGTATCGTGCCGG  
ACACAGCGCGTGGTGGGCGACCTCGCTTTACTTACCGCAGTGCATCCGGGGCGTAGCCGA  
CGTGATGGCCTCTAAGGACCCTTTGAACGGTGCACGACG

>ITS.13\_4\_3\_C4Frc

GGAAGTAAAAGTTCGTAACAAGGTTTCCGTAGGTGAACCTGCGGAAGGATCATTGTTCGTGA  
CCCTGACCAAATAGACCGTGCACGCGTCATCCAGCCTGCCGGCGGCGGCATCGTTTCGT  
GCTCGGCCAAGTCTCGACAACCTCCTCTCCTCGGAGTGGGGGCTCGGGGTA AAAAGAACC  
CACGACGCCTAAGGCGTCAAGGAACACTGTGCCTAGCCCGGGGACGCGGACGGCTTGCTG  
GCCGCCCCCGTGCTGCAATGCTATTTAATCCACACGACTCTCGGCAACGGATATCTCGG  
CTCTCGCATCGATGAAGAACGTAGCGAAATGCGATACCTGGTGTGAATTGCAGAATCCCG  
CGAACCATCGAGTCTTTGAACGCAAGTTGCGCCCCGAGGCCATTCGGCTGAGGGCACGCCT  
GCCTGGGCGTCACGTA AAAACACGCTCCCACACCCTCATCGGGTAGCGGGACGCGGCATGT  
GGTCCCCCGTAGCGCAAGCTGCGGTGGGCCGAAGATATGGCTGCCGGCGTATCGTGCCGG  
ACACAGCGCGTGGTGGGCGACCTCGCTTTACTTACCGCAGTGCATCCGGGGCGTAGCCGA  
CGTGATGGCCTCTAAGGACCCTATGAACGGTGCACGACG

>ITS.13\_4\_3\_C5F

GGAAGTAAAAGTTCGTAACAAGGTTTCCGTAGGTGAGCCTGCGGAAGGATCATTGTTCGTGA  
CCCTGACCAAATAGACCGTGCACGCGTCATCCAGCCTGCCGGCGGCGGCACCGTTTCGT  
GCTCGGCCAAGTCTCGACAACCTCCTCTCCTCGGAGTGGGGGCTCGGGGTA AAAAGAACC  
CACGACGCCTAAGGCGTCAAGGAACACTGTGCCTAGCCCGGGGACGCGGACGGCTTGCTG  
GCCGCTCTCGTGCTGCAATGCTATTTAATCCACACGACTCTCGGCAACGGATATCTCGG  
CTCTCGCATCGATGAAGAACGTAGCGAAATGCGATACCTGGTGTGAATTGCAGAATCCCG  
CGAACCATCGAGTCTTTGAACGCAAGTTGCGCCCCGAGGCCATTCGGCTGAGGGCACGCCT  
GCCTGGGCGTCACGTA AAAACACGCTCCCACACCCTCATCGGGTAGCGGGACGCGGCATGT  
GGTCCCCCGTAGCGCAAGCTGCGGTGGGCCGAAGATATGGCTGCCGGCGTATCGTGCCGG  
ACACAGCGCGTGGTGGGCGACCTCGCTTTACTTACCGCAGTGCATCCGGGGCGTAGCCGA  
CGTGATGGCCTCTAAGGACCCTATGAACGGTGCACGACG

>ITS.13\_4\_3\_C6Frc

GGAAGTAAAAGTTCGTAACAAGGTTTCCGTAGGTGAACCTGCGGAAGGATCATTGTTCGTGA  
CCCTGACCAAATAGACCGTGCACGCGTCATCCAGCCTGCCGGCGGCGGCACCGTTTCGT  
GCTCGGCCAAGTCTCGACAACCTCCTCTCCTCGGAGTGGGGGCTCGGGGTA AAAAGAACC  
CACGACGCCTAAGGCGTCAAGGAACACTGTGCCTAGCCCGGGGACGCGGACGGCTTGCTG  
GCCGCCCCCTCGTGCTGCAATGCTATTTAATCCACACGACTCTCGGCAACGGATATCTCGG  
CTCTCGCATCGATGAAGAACGTAGCGAAATGCGATACCTGGTGTGAATTGCAGAATCCCG  
CGAACCATCGAGTCTTTGAACGCAAGTTGCGCCCCGAGGCCATTCGGCTGAGGGCACGCCT  
GCCTGGGCGTCACGTA AAAACACGCTCCCACACCCTCATCGGGTAGCGGGACGCGGCATGT  
GGTCCCCCGTAGCGCAAGCTGCGGTGGGCCGAAGATATGGCTGCCGGCGTATCGTGCCGG  
ACACAGCGCGTGGTGGGCGACCTCGCTTTACTTACCGCAGTGCATCCGGGGCGTAGCCGA  
CGTGATGGCCTCTAAGGACCCTATGAACGGTGCACGACG

>ITS.13\_4\_3\_C7F

GGAAGTAAAAGTTCGTAACAAGGTTTCCGTAGGTGAACCTGCGGAAGGATCATTGTTCGTGA  
CCCTGACCAAATAGACCGTGCACGCGTCATCCAGCCTGCCGGCGGCGGCACCGTTTCGT  
GCTCGGCCAAGTCTCGACAACCTCCTCTCCTCGGAGTGGGGGCTCGGGGTA AAAAGAACC  
CACGACGCCTAAGGCGTCAAGGAACACTGTGCCTAGCCCGGGGACGCGGACGGCTTGCTG  
GCCGCCCCCGTGCTGCAATGCTATTTAATCCACACGACTCTCGGCAACGGATATCTCGG  
CTCTCGCATCGATGAAGAACGTAGCGAAATGCGATACCTGGTGTGAATTGCAGAATCCCG  
CGAACCATCGAGTCTTTGAACGCAAGTTGCGCCCCGAGGCCATTCGGCTGAGGGCACGCCT  
GCCTGGGCGTCACGTA AAAACACGCTCCCACACCCTCATCGGGTAGCGGGACGCGGCATGT  
GGTTCCCCGTAGCGCAAGCTGCGGTGGGCCGAAGATATGGCTGCCGGCGTATCGTGCCGG  
ACACAGCGCGTGGTGGGCGACCTCGCTTTACTTACCGCAGTGCATCCGGGGCGTAGCCGA  
CGTGATGGCCTCTAAGGACCCTATGAACGGTGCACGACG

>ITS.13\_4\_3\_C8Frc  
GGAAGTAAAAGTTCGTAACAAGGTTTCCGTAGGTGAACCTGCGGAAGGATCATTGTTCGTGA  
CCCTGACCAAATAGACCGTGCACGCGTCATCCAGCCTGCCGGCGGCGGCACCGTTTCGTC  
GCTCGGCCAAGTTCCTCGACAACCTCCTCTCCTCGGAGTGGGGGCTCGGGGTAAAAGAACC  
CACGACGCCTAAGGCGTCAAGGAACACTGTGCCTAGCCCGGGGACGCGGACGGCTTGCTG  
GCCGCCCTCGTGCTGCAATGCTATTTAATCCACACGACTCTCGGCAACGGATATCTCGG  
CTCTCGCATCGATGAAGAACGTAGCGAAATGCGATACCTGGTGTGAATTGCAGAATCCCG  
CGAACCATCGAGTCTTTGAACGCAAGTTGCGCCCCGAGGCCATTCGGCTGAGGGCACGCCT  
GCCTGGGCGTCACGTAAAACACGCTCCCACACCCTCATCGGGTAGCGGGACGCGGCATGT  
GGTCCCCCGTAGCGCAAGCTGCGGTGGGCCGAAGATATGGCTGCCGGCGTATCGTGCCGG  
ACACAGCGCGTGGTGGGCGACCTCGCTTTACTTACCGCAGTGCATCCGGGGCGTAGCCGA  
CGTGATGGCCTCTAAGGACCCCTTTGAACGGTGCACACGACG

>ITS.13\_4\_3\_C9Frc  
GGAAGTAAAAGTTCGTAACAAGGTTTCCGTAGGTGAACCTGCGGAAGGATCATTGTTCGTGA  
CCCTGACCAAATAGACCGTGGACGCGTCATCCAGCCTGCTGGCGGCGGCACCGTTTCATC  
GCTTAGCCAAGTTCCTCGACAACCTCCTCTCCTCGGAGTGGGGGCTCGGGGTAAAAGAACC  
CACGACGCCTAAGGCGTCAAGGAACACTGTGCCTAGCCCGGGGACGCGGACGGCTTGCTG  
GCCGCCCCCCGTGCTGCAATGCTATTTAATCCACACGACTCTCGGCAACGGATATCTCGG  
CTCTCGCATCGATGAAGAACGTAGCGAAATGCGATACCTGGTGTGAATTGCAGAATCCCG  
CGAACCATCGAGTCTTTGAACGCAAGTTGCGCCCCGAGGCCATTCGGCTGAGGGCACGCCT  
GCCTGGGCGTCACGTAAAACACGCTCCCACACCCTCATCGGGTAGCGGGACGCGGCATGT  
GGTCCCCCGTAGCGCAAGCTGCGGTGGGCCGAAGATATGGCTGCCGGCGTATCGTGCCGG  
ACACAGCGCGTGGTGGGCGACCTCGCTTTACTTACCGCAGTGCATCCGGGGCGTAGCCGA  
CGTGATGGCCTCTAAGGACCCCTTTGAACGGTGCACACGACG

>ITS.13\_4\_4\_C1R  
GGAAGTAAAAGTTCGTAACAAGGTTTCCGTAGGTGAACCTGCGGAAGGATCATTGTTCGTGA  
CCCTGACCAAATAGACCGTGCACGCGTCATCCAGCCTGCCGGCGGCGGCACCGTTTCGTC  
GCTCGGCCAAGTTCCTCGACAACCTCCTCTCCTCGGAGTGGGGGCTCGGGGTAAAAGAACC  
CACGACGCCTAAGGCGTCAAGGAACACTGTGCCTAGCCCGGGGACGCGGACGGCTTGCTG  
GCCGCCCCCCGTGCTGCAATGCTATTTAATCCACACGACTCTCGGCAACGGATATCTCGG  
CTCTCGCATCGATGAAGAACGTAGCGAAATGCGATACCTGGTGTGAATTGCAGAATCCCG  
CGAACCATCGAGTCTTTGAACGCAAGTTGCGCCCCGAGGCCATTCGGTTGAGGGCACGCCT  
GCCTAGGCGTCACGCAAAAACACGCTCCCACACCCTCATCGGGTAGCGGGACGCGGCATGT  
GGTCCCCCGTAGCGCAAGCTGCGGTGGGCCGAAGATATGGCTGCCGGCGTATCGTGCCGG  
ACACAGCGCGTGGTGGGCGACCTCGCTTTACTTACCGCAGTGCATCCGGGGCGTAGCCGA  
CGTGATGGCCTCTAAGGACCCCTTTGAACGGTGCACACGACG

>ITS.13\_4\_4\_C2R  
GGAAGTAAAAGTTCGTAACAAGGTTTCCGTAGGTGAACCTGCGGAAGGATCATTGTTCGTGA  
CCCTGACCAAATAGACCGTGCACGCGTCATCCAGCCTGCCGGCGGCGGCACCGTTTCGTC  
GCTCGGCCAAGTTCCTCGACAACCTCCTCTCCTCGGAGTGGGGGCTCGGGGTAAAAGAACC  
CACGACGCCTAAGGCGTCAAGGAACACTGTGCCTAGCCCGGGGACGCGGACGGCTTGCTG  
GCCGCCCCCCGTGCTGCAATGCTATTTAATCCACACGACTCTCGGCAGCGGATATCTCGG  
CTCTCGCATCGATGAAGAACGTAGCGAAATGCGATACCTGGTGTGAATTGCAGAATCCCG  
CGAACCATCGAGTCTTTGAACGCAAGTTGCGCCCCGAGGCCATTCGGCTGAGGGCACGCCT  
GCCTGGGCGTCACGCAAAAACACGCTCCCACACCCTCATCGGGTAGCGGGACGCGGCATGT  
GGTCCCCCGTAGCGCAAGCTGCGGTGGGCCGAAGATATGGCTGCCGGCGTATCGTGCCGG  
ACACAGCGCGTGGTGGGCGACCTCGCTTTACTTACCGCAGTGCATCCGGGGCGTAGCCGA  
CGTGATGGCCTCTAAGGACCCCTTTGAACGGTGCACACGACG

>ITS.13\_4\_4\_C3F  
GGAAGTAAAAGTTCGTAACAAGGTTTCCGTAGGTGAACCTGCGGAAGGATCATTGTTCGTGA  
CCCTGACCAAATAGACCGTGCACGCGTCATCCAGCCTGCCGGCGGCGGCACCGTTTCGTC  
GCTCGGCCAAGTTCCTCGACAACCTCCTCTCCTCGGAGTGGGGGCTCGGGGTAAAAGAACC  
CACGACGCCTAAGGCGTCAAGGAACACTGTGCCTAGCCCGGGGACGCGGACGGCTTGCTG  
GCCGCCCCCCGTGCTGCAATGCTATTTAATCCACACGACTCTCGGCAACGGATATCTCGG  
CTCTCGCATCGATGAAGAACGTAGCGAAATGCGATACCTGGTGTGAATTGCAGAATCCCG  
CGAACCATCGAGTCTTTGAACGCAAGTTGCGCCCCGAGGCCATTCGGCTGAGGGCACGCCT  
GCCTGGGCGTCACGCAAAAACACGCTCCCACACCCTCATCGGGTAGCGGGACGCGGCATGT  
GGTCCCCCGTAGCGCAAGCTGCGGTGGGCCGAAGATATGGCTGCCGGCGTATCGTGCCGG  
ACACAGCGCGTGGTGGGCGACCTCGCTTTACTTACCGCAGTGCATCCGGGGCGTAGCCGA  
CGTGATGGCCTCTAAGGACCCCTTTGAACGGTGCACACGACG

CTCTCGCATCGATGAAGAACGTAGCGAAATGCGATACCTGGTGTGAATTGCAGAATCCCG  
CGAACCATCGAGTCTTTGAACGCAAGTTGCGCCCCGAGGCCATTCGGCTGAGGGCACGCCT  
GCCTGGGCGTCACGCAAAACACGCTCCCACACCCTCATCGGGTAGCGGGACGCGGCATGT  
GGTCCCCCGTAGCGCAAGCTGCGGTGGGCCGAAGATATGGCTGCCGGCGTATCGTGCCGG  
ACACAGCGCGTGGTGGGCGACCTCGCTTTACTTACCGCAGTGCATCCGGGGCGTAGCCGA  
CGTGATGGCCTCTAAGGACCCTATGAACGGTGCACGACG

>ITS.13\_4\_4\_C4Frc

GGAAGTAAAAGTCGTAAACAAGGTTTCCGTAGGTGAACCTGCGGAAGGATCATTGTCTGTGA  
CCCTGACCAAATAGACCGTGCACGCGTCATCCAGCCTGCCGGCGGCGGCACCGTTTCGTC  
GCTCGGCCAAGTCTCGACAACCTCCTCTCCTCGGAGTGGGGGCTCGGGGTAAAAGAACC  
CACGACGCCTAAGGCGTCAAGGAACACTGTGCCTAGCCCGGGGACGCGGACGGCTTGCTG  
GCCGCCCCCGTGCTGCAATGCTATTTAATCCACACGACTCTCGGCAACGGATATCTCGG  
CTCTCGCATCGATGAAGAACGTAGCGAAATGCGATACCTGGTGTGAATTGCAGAATCCCG  
CGAACCATCGAGTCTTTGAACGCAAGTTGCGCCCCGAGGCCATTCGGCTGAGGGCACGCCT  
GCCTGGGCGTCACGCAAAACACGCTCCCACACCCTCATCGGGTAGCGGGACGCGGCATGT  
GGTCCCCCGTAGCGCAAGCTGCGGTGGGCCGAAGATATGGCTGCCGGCGTATCGTGCCGG  
ACACAGCGCGTGGTGGGCGACCTCGCTTTACTTACCGCAGTGCATCCGGGGCGTAGCCGA  
CGTGATGGCCTCTAAGGACCCTATGAACGGTGCACGACG

>ITS.13\_4\_4\_C5F

GGAAGTAAAAGTCGTAAACAAGGTTTCCGTAGGTGAACCTGCGGAAGGATCATTGTCTGTGA  
CCCTGACCAAATAGACCGTGCACGCGTCATCCAGCCTGCCGGCGGCGGCACCGTTTCGTC  
GCTCGGCCAAGTCTCGACAACCTCCTCTCCTCGGAGTGGGGGCTCGGGGTAAAAGAACC  
CACGACGCCTAAGGCGTCAAGGAACACTGTGCCTAGCCCGGGGACGCGGACGGCTTGCTG  
GCCGCCCCCGTGCTGCAATGCTATTTAATCCACACGACTCTCGGCAACGGATATCTCGG  
CTCTCGCATCGATGAAGAACGTAGCGAAATGCGATACCTGGTGTGAATTGCAGAATCCCG  
CGAACCATCGAGTCTTTGAACGCAAGTTGCGCCCCGAGGCCATTCGGCTGAGGGCACGCCT  
GCCTGGGCGTCACGCAAAACACGCTCCCACACCCTCATCGGGTAGCGGGACGCGGCATGT  
GGTCCCCCGTAGCGCAAGCTGCGGTGGGCCGAAGATATGGCTGCCGGCGTATCGTGCCGG  
ACACAGCGCGTGGTGGGCGACCTCGCTTTACTTACCGCAGTGCATCCGGGGCGTAGCCGA  
CGTGATGGCCTCTAAGGACCCTATGAACGGTGCACGACG

>ITS.13\_4\_4\_C6Frc

GGAAGTAAAAGTCGTAAACAAGGTTTCCGTAGGTGAACCTGCGGAAGGATCATTGTCTGTGA  
CCCTGACCAAATAGACCGTGCACGCGTCATCCAGCCTGCCGGCGGCGGCACCGTTTCGTC  
GCTCGGCCAAGTCTCGACAACCTCCTCTCCTCGGAGTGGGGGCTCGGGGTAAAAGAACC  
CACGACGCCTAAGGCGTCAAGGAACACTGTGCCTAGCCCGGGGACGCGGACGGCTTGTTG  
GCCGCCCCCGTGCTGCAATGCTATTTAATCCACACGACTCTCGGCAACGGATATCTCGG  
CTCTCGCATCGATGAAGAACGTAGCGAAATGCGATACCTGGTGTGAATTGCAGAATCCCG  
CGAACCATCGAGTCTTTGAACGCAAGTTGCGCCCCGAGGCCATTCGGCTGAGGGCACGCCT  
GCCTGGGCGTCACGCAAAACACGCTCCCACACCCTCATCGGGTAGCGGGACGCGGCATGT  
GGTCCCCCGTAGCGCAATCTGCGGTGGGCCGAAGATATGGCTGCCGGCGTATCGTGCCGG  
ACACAGCGCGTGGTGGGCGACCTCGCTTTACTTACCGCAGTGCATCCGGGGCGTAGCCGA  
CGTGATGGCCTCTAAGGACCCTTTGAACGGTGCACGACG

>ITS.13\_4\_4\_C7F

GGAAGTAAAAGTCGTAAACAAGGTTTCCGTAGGTGAACCTGCGGAAGGATCATTGTCTGTGA  
CCCTGACCAAATAGACCGTGCACGCGTCATCCAGCCTGCCGGCGGCGGCACCGTTTCGTC  
GCTCGGCCAAGTCTCGACAACCTCCTCTCCTCGGAGTGGGGGCTCGGGGTAAAAGAACC  
CACGACGCCTAAGGCGTCAAGGAACACTGTGCCTAGCCCGGGGACGCGGACGGCTTGCTG  
GCCGCCCCCGTGCTGCAATGCTATTTAATCCACACGACTCTCGGCAACGGATATCTCGG  
CTCTCGCATCGATGAAGAACGTAGCGAAATGCGATACCTGGTGTGAATTGCAGAATCCCG  
CGAACCATCGAGTCTTTGAACGCAAGTTGCGCCCCGAGGCCATTCGGCTGAGGGCACGCCT  
GCCTGGGCGTCACGCAAAACACGCTCCCACACCCTCATCGGGTAGCGGGACGCGGCATGT  
GGTCCCCCGTAGCGCAAGCTGCGGTGGGCCGAAGATATGGCTGCCGGCGTATCGTGCCGTG  
ACACAGCGCGTGGTGGGCGACCTCGCTTTACTTACCGCAGTGCATCCGGGGCGTAGCCGA  
CGTGATGGCCTCTAAGGACCCTATGAACGGTGCACGACG

>ITS.13\_4\_4\_C10Frc

GGAAGTAAAAGTCGTAACAAGGTTTCCGTAGGTGAACCTGCGGAAGGATCATTGTTCGTGA  
CCCTGACCAAATAGACCGTGCACGCGTCATCCAGCCTGCCGGCGGCGGCACCGTTTCGTG  
GCTCGGCCAAGTCCTCGACAACCTCCTCTCCTCGGAGTGGGGGCTCGGGGTAAAAGAACC  
CACGACGCCTAAGGCGTCAAGGAACACTGTGCCTAGCCCGGGGACGCGGACGGCTTGCTG  
GCCGCCCCCGTGTGCAATGCTATTTAATCCACACGACTCTCGGCAACGGATATCTCGG  
CTCTCGCATCGATGAAGAACGTAGCGAAATGCGATACCTGGCGTGAATTGCAGAATCCCC  
CGAACCATCGAGTCTTTGAACGCAAGTTGCGCCCCGAGGCCATTCGGCTGAGGGCACGCCT  
GCCTGGGCGTCACGCAAAACACGCTCCCACACCCTCATCGGGTAGCGGGACGCGGCATGT  
GGTCCCCCGTAGCGCAAGCTGCGGTGGGCCGAAGATATGGCTGCCGGCGTATCGTGCCGG  
ACACAGCGCGTGGTGGGCGACCTCGCTTTACTTACCGCAGTGCATCCGGGGCGTAGCCGA  
CGTGATGGCCTCTAAGGACCCCTATGAACGGTGCACACGACG

>ITS.13\_6\_C1R

GGAAGTAAAAGTCGTAACAAGGTTTCCGTAGGTGAACCTGCGGAAGGATCATTGTTCGTGA  
CCCTGACCAAATAGACCGTGCACGCGTCATCCAGCCTGCCGGCGGCGGCACCGTTTCGTG  
GCTCGGCCAAGTCCTCGACAACCTCCTCTCCTCGGAGTGGGGGCTCGGGGTAAAAGAACC  
CACGACGCCTAAGGCGTCAAGGAACACTGTGCCTAGCCCGGGGACGCGGACGGCTTGCTG  
GCCGCCCCCGTGTGCAATGCTATTTAATCCACACGACTCTCGGCAACGGATATCTCGG  
CTCTCGCATCGATGAAGAACGTAGCGAAATGCGATACCTGGTGTGAATTGCAGAATCCCC  
CGAACCATCGAGTCTTTGAACGCAAGTTGCGCCCCGAGGCCATTCGGCTGAGGGCACGCCT  
GCCTGGGCGTCACGCAAAACACGCTCCCACACCCTCATCGGGTAGCGGGACGCGGCATGT  
GGTCCCCCGTAGCGCAAGCTGCGGTGGGCCGAAGATATGGCTGCCGGCGTATCGTGCCGG  
ACACAGCGCGTGGTGGGCGACCTCGCTTTACTTACCGCAGTGCATCCGGGGCGTAGCCGA  
CGTGATGGCCTCTAAGGACCCCTATGAACGGTGCACACGACG

>ITS.13\_6\_C2R

GGAAGTAAAAGTCGTAACAAGGTTTCCGTAGGTGAACCTGCGGAAGGATCATTGTTCGTGA  
CCCTGACCAAATAGACCGTGCACGCGTCACCCAGCCTGCCGGCGGCGGCACCGTTTCGTG  
GCTCGGCCAAGTCCTCGACAACCTCCTCTCCTCGGAGTGGGGGCTCGGGGTAAAAGAACC  
CACGACGCCTAAGGCGTCAAGGAACACTGTGCCTAGCCCGGGGACGCGGACGGCTTGCTG  
GCCGCCCCCGTGTGCAATGCTATTTAATCCACACGACTCTCGGCAACGGATATCTCGG  
CTCTCGCATCGATGAAGAACGTAGCGAAATGCGATACCTGGTGTGAATTGCAGAATCCCC  
CGAACCATCGAGTCTTTGAACGCAAGTTGCGCCCCGAGGCCATTCGGCTGAGGGCACGCCT  
GCCTGGGCGTCACGCAAAACACGCTCCCACACCCTCATCGGGTAGCGGGACGCGGCATGT  
GGTCCCCCGTAGCGCAAGCTGCGGTGGGCCGAAGATATGGCTGCCGGCGTATCGTGCCGG  
ACACAGCGCGTGGTGGGCGACCTCGCTTTACTTACCGCAGCGCATCCGGGGCGTAGCCGA  
CGTGATGGCCTCTAAGGACCCCTTTGAACGGTGCACACGACG

>ITS.13\_6\_C3F

GGAAGTAAAAGTCGTAACAAGGTTTCCGTAGGTGAACCTGCGGAAGGATCATTGTTCGTGA  
CCCTGACCAAATAGACCGTGCACGCGTCATCCAGCCTGCCGGCGGCGGCACCGTTTCGTG  
GCTCGGCCAAGTCCTCGACAGCCTCCTCTCCTCGGAGTGGGGGCTCGGGGTAAAAGAACC  
CACGACGCCTAAGGCGTCAAGGAACACTGTGCCTAGCCCGGGGACGCGGACGGCTTGCTG  
GCCGCCCCCGTGTGCAATGCTATTTAATCCACACGACTCTCGGCAACGGATATCTCGG  
CTCTCGCATCGATGAAGAACGTAGCGAAATGCGATACCTGGTGTGAATTGCAGAATCCCC  
CGAACCATCGAGTCTTTGAACGCAAGTTGCGCCCCGAGGCCATTCGGTTGAGGGCACGCCT  
GCCTGGGCGTCACGCAAAACACGCTCCCACACCCTCATCGGGTAGCGGGACGCGGCATGT  
GGTCCCCCGTAGCGCAAGCTGCGGTGGGCCGAAGATATGGCTGCCGGCGTATCGTGCCGG  
ACACAGCGCGTGGTGGGCGACCTCGCTTTACTTACCGCAGTGCATCCGGGGCGTAGCCGA  
CGTGATGGCCTCTAAGGACCCCTTTGAACGGTGCACACGACG

>ITS.13\_6\_C4Frc

GGAAGTAAAAGTCGTAACAAGGTTTCCGTAGGTGAACCTGCGGAAGGATCATTGTTCGTGA  
CCCTGACCAAATAGACCGTGCACGCGTCATCCAGCCTGCCGGCGGCGGCACCGTTTCGTG  
GCTCGGCCAAGTCCTCGACAACCTCCTCTCCTCGGAGTGGGGGCTCGGGGTAAAAGAACC  
CACGACGCCTAAGGCGTCAAGGAACACTGTGCCTAGCCCGGGGACGCGGACGGCTTGCTG  
GCCGCCCCCGTGTGCAATGCTATTTAATCCACACGACTCTCGGCAACGGATATCTCGG  
CTCTCGCATCGATGAAGAACGTAGCGAAATGCGATACCTGGTGTGAATTGCAGAATCCCC  
CGAACCATCGAGTCTTTGAACGCAAGTTGCGCCCCGAGGCCATTCGGTTGAGGGCACGCCT  
GCCTGGGCGTCACGCAAAACACGCTCCCACACCCTCATCGGGTAGCGGGACGCGGCATGT  
GGTCCCCCGTAGCGCAAGCTGCGGTGGGCCGAAGATATGGCTGCCGGCGTATCGTGCCGG  
ACACAGCGCGTGGTGGGCGACCTCGCTTTACTTACCGCAGTGCATCCGGGGCGTAGCCGA  
CGTGATGGCCTCTAAGGACCCCTATGAACGGTGCACACGACG

CTCTCGCATCGATGAAGAACGTAGCGAAATGCGATACCTGGTGTGAATTGCAGAATCCCG  
CGAACCATCAAGTCTTTGAACGCAAGTTGCGCCCCGAGGCCATTCGGCTGAGGGCACGCCT  
GCCTGGGCGTCACGTAACACACGCTCCCACACCCTCATCGGGTAGCGGGACGCGGCATGT  
GGTCCCCCGTAGCGCAAGCTGCGGTGGGCCGAAGATATGGCTGCCGGCGTATCGTGCCGG  
ACACAGCGCGTGGTGGGCGACCTCGCTTTACTTACCGCAGTGCATCCGGGGCGTAGCCGA  
CGTGATGGCCTCTAAGGACCCTATGAACGGTGCACACGACG

>ITS.13\_6\_C5Frc

GGAAGTAAAAGTTCGTAACAAGGTTTCCGTAGGTGAACCTGCGGAAGGATCATTGTCTGTGA  
CCCTGACCAAATAGACCGTGCACGCGTCATCCAGCCTGCCGGCGGGCACCCTTCGTC  
GCTCGGCCAAGTCTCGACAGCCTCCTCTCCTCGGAGTGGGGGCTCGGGGTAAGAACC  
CACGACGCCTAAGGCGTCAAGGAACACTGTGCCTAGCCGGGGACGCGGACGGCTTGCTG  
GCCGCCCCCGTGCTGCAATGCTATTTAATCCACACGACTCTCGGCAACGGATATCTCGG  
CTCTCGCATCGATGAAGAACGTAGCGAAATGCGATACCTGGTGTGAATTGCAGAATCCCG  
CGAACCATCGAGTCTTTGAACGCAAGTTGCGCCCCGAGGCCATTCGGCTGAGGGCACGCCT  
GCCTGGGCGTCACGCAAAACACGCTCCCACACCCTCATCGGGTAGCGGGACGCGGCATGT  
GGTCCCCCGTAGCGCAAGCTGCGGTGGGCCGAGGATATGGCTGCCGGCGTATCGTGCCGG  
ACACAGCGCGTGGTGGGCGACCTCGCTTTACTTACCGCAGTGCATCCGGGGCGTAGCCGA  
CGTGATGGCCTCTAAGGACCCTTTGAACGGTGCACACGACG

>ITS.13\_6\_C7Frc

GGAAGTAAAAGTTCGTAACAAGGTTTCCGTAGGTGAACCTGCGGAAGGATCATTGTCTGTGA  
CCCTGACCAAATAGACCGTGCACGCGTCATCCAGCCTGCCGGCGGGCACCCTTCGTC  
GCTCGGCCAAGTCTCGACAACCTCCTCTCCTCGGAGTGGGGGCTCGGGGTAAGAACC  
CACGACGCCTAAGGCGTCAAGGAACACTGTGCCTAGCCGGGGACGCGGACGGCTTGCTG  
GCCGCCCCCGTGCTGCAATGCTATTTAATCCACACGACTCTCGGCAACGGATATCTCGG  
CTCTCGCATCGATGAAGAACGTAGCGAAATGCGATACCTGGTGTGAATTGCAGAATCCCG  
CGAACCATCGAGTCTTTGAACGCAAGTTGCGCCCCGAGGCCATTCGGTTGAGGGCACGCCT  
GCCTGGGCGTCACGCAAAACACGCTCCCACACCCTCATCGGGTAGCGGGACGCGGCATGT  
GGTCCCCCGTAGCGCAAGCTGCGGTGGGCCGAAGATATGGCTGCCGGCGTATCGTGCCGG  
ACACAGCGCGTGGTGGGCGACCTCGCTTTACTTACCGCAGTGCATCCGGGGCGTAGCCGA  
CGTGATGGCCTCTAAGGACCCTTTGAACGGTGCACACGACG

>ITS.13\_6\_C8F

GGAAGTAAAAGTTCGTAACAAGGTTTCCGTAGGTGAACCTGCGGAAGGATCATTGTCTGTGA  
CCCTGACCAAAGATAGACCGTGCACGCGTCATCCAGCCTGCCGGCGGGCACCCTTCGTC  
GCTCGGCCAAGTCTCGACAACCTCCTCTCCTCGGAGTGGGGGCTCGGGGTAAGAACC  
CACGACGCCTAAGGCGTCAAGGAACACTGTGCCTAGCTCGGGGACGCGGACGGCTTGCTG  
GCCGCCCCCTCGTGCTGCAATGCTATTTAATCCACACGACTCTCGGCAACGGATATCTCGG  
CTCTCGCATCGATGAAGAACGTAGCGAAATGCGATACCTGGTGTGAATTGCAGAATCCCG  
CGAACCATCGAGTCTTTGAACGCAAGTTGCGCCCCGAGGCCATTCGGCTGAGGGCACGCCT  
GCCTGGGCGTCACGCAAAACACGCTCCCACACCCTCATCGGGTAGCGGGACGCGGCATGT  
GGTCCCCCGTAGCGCAAGCTGCGGTGGGCCGAAGATATGGCTGCCGGCTTATCGTGCCGG  
ACACAGCGCGTGGTGGGCGACCTCGCTTTACTTACCGCAGTGCATCCGGGGCGTAGCCGA  
CGTGATGGCCTCTAAGGACCCTATGAACGGTGCACACGACG

>ITS.13\_6\_C9Frc

GGAAGTAAAAGTNGTAACAAGGTTTCCGTAGGTGAACCTGCGGAAGGATCATTGTCTGTGA  
CCCTGACCAAATAGACCGTGCACGCGTCATCCAGCCTGCCGGCGGGCACCCTTCGTC  
GCTCGGCCAAGTCTCGACAACCTCCTCTCCTCGGAGTGGGGGCTCGGGGTAAGAACC  
CACGACGCCTAAGGCGTCAAGGAACACTGTGCCTAGCCGGGGACGCGGACGGCTTGCTG  
GCCGCCCCCGTGCTGCAATGCTATTTAATCCACACGACTCTCGGCAATGGATATTTCGG  
CTCTCGCATCGATGAAGAACGTAGTGAATGCGATACCTGGTGTGAATTGCAGAATCCCG  
CGAACCATCGAGTCTTTGAACGCAAGTTGCGCCCCGAGGCCATTCGGCTGAGGGCACGCCT  
GCCTGGGCGTCACGCAAAACACGCTCCCACACCCTCATCGGGTAGCGGGACGCGGCATGT  
GGTCCCCCGTAGCGCAAGCTGCGGTGGGCCGAAGATATGGCTGCCGGCGTATCGTGCCGG  
ACACAGCGCGTGGTGGGCGACCTCGCTTTACTTACCGCAGTGCATCCGGGGCGTAGCCGA  
CGTGATGGCCTCTAAGGACCCTATGAACGGTGCACACGACG

>ITS.090\_C1R

GGAAGTAAAAGTCGTAACAAGGTTTCCGTAGGTGAACCTGCGGAAGGATCATTGTTCGTGA  
CCCTGACCAAATAGACCGTGCACGCGTCATCCAGCCTGCCGGCGGCGGCACCGTTTCGTC  
GCTCGGCCAAGTCCTCGACAACCTCCTCTCCTCGGAGTGGGGGCTCGGGGTAAAAGAACC  
CACGACGCCTAAGGCGTCAAGGAACACTGTGCCTAGCCGGGGACGCGGACGGCTTGCTG  
GCCGCCCCCGTGCTGCAATGCTATTTAATCCACACGACTCTCGGCAACGGATATCTCGG  
CTCTCGCATCGATGAAGAACGTAGCGAAATGCGATACCTGGTGTGAATTGCAGAATCCCC  
CGAACCATCGAGTCTTTGAACGCAAGTTGCGCCCCGAGGCCATTCGGTTGAGGGCACGCCT  
GCCTGGGCGTACGCAAAAACAGCTCCCACACCCTCATCGGGTAGCGGGACGCGGCATGT  
GGTCCCCCGTAGCGCAAGCTGCGGTGGGCCGAAGATATGGCTGCCGGCGTATCGTGCCGG  
ACACAGCGCGTGGTGGGCGACCTCGCTTTACTTACCGCAGTGCATCCGGGGCGTAGCCGA  
CGTGATGGCCTCTAAGGACCCCTTTGAACGGTGCACACGACG

>ITS.090\_C2R

GGAAGTAAAAGTCGTAACAAGGTTTCCGTAGGTGAACCTGCGGAAGGATCATTGTTCGTGA  
CCCTGACCAAATAGACCGTGCACGCGTCATCCAGCCTGCCGGCGGCGGCACCGTTTCGTC  
GCTCGGCCAAGTCCTCGACAACCTCCTCTCCTCGGAGTGGGGGCTCGGGGTAAAAGAACC  
CACGACGCCTAAGGCGTCAAGGAACACTGTGCCTAGCCGGGGACGCGGACGGCTTGCTG  
GCCGCCCCCGTGCTGCAATGCTATTTAATCCACACGACTCTCGGCAACGGATATCTCGG  
CTCTCGCATCGATGAAGAACGTAGCGAAATGCGATACCTGGTGTGAATTGCAGAATCCCC  
CGAACCATCGAGTCTTTGAACGCAAGTTGCGCCCCGAGGCCATTCGGTTGAGGGCACGCCT  
GCCTGGGCGTACGCAAAAACAGCTCCCACACCCTCATCGGGTAGCGGGACGCGGCATGT  
GGTCCCCCGTAGCGCAAGCTGCGGTGGGCCGAAGATATGGCTGCCGGCGTATCGTGCCGG  
ACACAGCGCGTGGTGGGCGACCTCGCTTTACTTACCGCAGTGCATCCGGGGCGTAGCCGA  
CGTGATGGCCTCTAAGGACCCCTTTGAACGGTGCACACGACG

>ITS.090\_C3R

GGAAGTAAAAGTCGTAACAAGGTTTCCGTAGGTGAACCTGCGGAAGGATCATTGTTCGTGA  
CCCTGACCAAATAGACCGTGCACGCGTCATCCAGCCTGCCGGCGGCGGCACCGTTTCGTC  
GCTCGGCCAAGTCCTCGACAACCTCCTCTCCTCGGAGTGGGGGCTCGGGGTAAAAGAACC  
CACGACGCCTAAGGCGTCAAGGAACACTGTGCCTAGCTCGGGGACGCGGACGGCTTGCTG  
GCCGCCCCCTCGTGCTGCAATGCTATTTAATCCACACGACTCTCGGCAACGGATATCTCGG  
CTCTCGCATCGATGAAGAACGTAGCGAAATGCGATACCTGGTGTGAATTGCAGAATCCCC  
CGAACCATCGAGTCTTTGAACGCAAGTTGCGCCCCGAGGCCATTCGGTTGAGGGCACGCCT  
GCCTGGGCGTACGCAAAAACAGCTCCCACACCCTCATCGGGTAGCGGGACGCGGCATGT  
GGTCCCCCGTAGCGCAAGCTGCGGTGGGCCGAAGATATGGCTGCCGGCGTATCGTGCCGG  
ACACAGCGCGTGGTGGGCGACCTCGCTTTACTTACCGCAGTGCATCCGGGGCGTAGCCGA  
CGCGATGGCCTCTAAGGACCCCTTTGAACGGTGCACACGACG

>ITS.090\_C4Frc\_rev

GGAAGTAAAAGTCGTAACAAGGTTTCCGTAGGTGAACCTGCGGAAGGATCATTGTTCGTGA  
CCCTGACCAAATAGACCGTGCACGCGTCATCCAGCCTGCCGGCGGCGGCACCGTTTCGTC  
GCTCGGCCAAGTCCTCGACAACCTCCTCTCCTCGGAGTGGGGGCTCGGGGTAAAAGAACC  
CACGACGCCTAAGGCGTCAAGGAACACTGTGCCTAGCCGGGGACGCGGACGGCTTGCTG  
GCCGCCCCCGTGCTGCAATGCTATTTAATCCACACGACTCTCGGCAACGGATATCTCGG  
CTCTCGCATCGATGAAGAACGTAGCGAAATGCGATACCTGGTGTGAATTGCAGAATCCCC  
CGAACCATCGAGTCTTTGAACGCAAGTTGCGCCCCGAGGCCATTCGGTTGAGGGCACGCCT  
GCCTGGGCGTACGCAAAAACAGCTCCCACACCCTCATCGGGTAGCGGGACGCGGCCTGT  
GGTCCCCCGTAGCGCAAGCTGCGGTGGGCCGAAGATATGGCTGCCGGCGTATCGTGCCGG  
ACACAGCGCGTGGTGGGCGACCTCGCTTTACTTACCGCAGTGCATCCGGGGCGTAGCCGA  
CGTGATGGCCTCTAAGGACCCCTATGAACGGTGCACACGACG

>ITS.090\_C5Frc\_rev

GGAAGTAAAAGTCGTAACAAGGTTTCCGTAGGTGAACATGCGGAAGGATCATTGTTCGTGA  
CCCTGACCAAACAGACCGCGCACGCATCATCCAGCCTGCCGGCGGCGACACCGTTTCGTC  
GCTCTTTCAAGTCCTCGATTCTCCTCTCCTCGGAGTGGGGGCTCGGGGTAAAAGAACC  
ACGACGCCTTAAGGCGTCAAGGAACACTGTGCCTAGCCGGGGACGCGGACGGCTTGCTG  
GCCGCCCCCGTGCTGCAATGCTATTTAATCCACACGACTCTCGGCAACGGATATCTCGG

CTCTCGCATCGATGAAGAACGTAGCGAAATGCGATACCTGGTGTGAATTGCAGAATCCCG  
CGAACCATCGAGTCTTTGAACGCAAGTTGCGCCCCGAGGCCATTCGGCTGAGGGCACGCCT  
GCCTGGGCGTCACGCAAAAACACGCTCCCACACCCTCATCGGGTAGCGGGACGCGGCATGT  
GGTCCCCCGTAGCGCAAGCTGCGGTGGGCCGAAGATATGGCTGCCGGCGTATCGTGCCGG  
ACACAGCGCGTGGTGGGCGACCTCGCTTTACTTACCGCAGTGCATCCGGGGCGTAGCCGA  
CGTGATGGCCTCTAAGGACCCTATGAACGGTGCACGACG

>ITS.090\_C6F

GGAAGTAAAAGTCGTAACAAGGTTTCCGTAGGTGAACCTGCGGAAGGATCATTGTCTGTGA  
CCCTGACCAAAATAGACCGTGCACGCGTCATCCAGCCTGCCGGCGGGCACCCTTCGTC  
GCTCGGCCAAGTCTCGACAACCTCCTCTCCTCGGAGTGGGGGCTCGGGGTAAAAGAACC  
CACGACGCCTAAGGCGTCAAGGAACACTGTGCCTAGCCGGGGACGCGGACGGCTTGCTG  
GCCGCCCCCGTGCTGCAATGCTATTTAATCCACACGACTCTCGGCAACGGATATCTCGG  
CTCTCGCATCGATGAAGAACGTAGCGAAATGCGATACCTGGTGTGAATTGCAGAATCCCG  
CGAACCATCGAGTCTTTGAACGCAAGTTGCGCCCCGAGGCCATTCGGTTGAGGGCACGCCT  
GCCTGGGCGTCACGCAAAAACACGCTCCCACACCCTCATCGGGTAGCGGGACGCGGCCTGT  
GGTCCCCCGTAGCGCAAGCTGCGGTGGGCCGAAGATATGGCTGCCGGCGTATCGTGCCGG  
ACACAGCGCGTGGTGGGCGACCTCGCTTTACTTACCGCAGTGCATCCGGGGCGTAGCCGA  
CGTGATGGCCTCTAAGGACCCTATGAACGGTGCACGACG

>ITS.090\_C7F

GGAAGTAAAAGTCGTAACAAGGTTTCCGTAGGTGAACCTGCGGAAGGATCATTGTCTGTGA  
CCCTGACCAAAATAGACCGTGCACGCGTCATCCAGCCTGCCGGCGGGCACCCTTCGTC  
GCTCGGCCAAGTCTCGACAACCTCCTCTCCTCGGAGTGGGGGCTCGGGGTAAAAGAACC  
CACGACGCCTAAGGCGTCAAGGAACACTGTGCCTAGCCGGGGACGCGGACGGCTTGCTG  
GCCGCCCCCGTGCTGCAATGCTATTTAATCCACACGACTCTCGGCAATGGATATCTCGGC  
TCTCGCATCGATGAAGGACGTAGCGAAATGCGATACCTGGTGTGAATTGCAGAATCCCGC  
GAACCATCGAGTCTTTGAACGCAAGTTGCGCCCCGAGGCCATTCGGCTGAGGGCACGCCTG  
CCTGGGCGTCACGCAAAAACACGCTCCCACACCCTCATCGGGTAGCGGGACGCGGCATGTG  
GTCCCCCGTAGCGCAAGCTGCGGTGGGCCGAAGATATGGCTGCCGGCGTATCGTGCCGGA  
CACAGCGCGTGGTGGGCGACCTCGCTTTACTTACCGCAGTGCATCCGGGGCGTAGCCGAC  
GTGATGGCCTCTAAGGACCCTATGAACGGTGCACGACG

>ITS.090\_C8F

GGAAGTAAAAGTCGTAACAAGGTTTCCGTAGGTGAACCTGCGGAAGGATCATTGTCTGTGA  
CCCTGACCAAAATAGACCGTGCACGCGTCATCCAGCCTGCCGGCGGGCACCCTTCGTC  
GCTCGGCCAAGTCTCGACAACCTCCTCTCCTCGGAGTGGGGGCTCGGGGTAAAAGAACC  
CACGACGCCTAAGGCGTCAAGGAACACTGTGCCTAGCTCGGGGACGCGGACGGCTTGCTG  
GCCGCCCCCTCGTGCTGCAATGCTATTTAATCCACACGACTCTCGGCAACGGATATCTCGG  
CTCTCGCATCGATGAAGAACGTAGCGAAATGCGATACCTGGTGTGAATTGCAGAATCCCG  
CGAACCATCGAGTCTTTGAACGCAAGTTGCGCCCCGAGGCCATTCGGTTGAGGGCACGCCT  
GCCTGGGCGTCACGCAAAAACACGCTCCCACACCCTCATCGGGTAGCGGGACGCGGCCTGT  
GGTCCCCCGTAGCGCAAGCTGCGGTGGGCCGAAGATATGGCTGCCGGCGTATCGTGCCGG  
ACACAGCGCGTGGTGGGCGACCTCGCTTTACTTACCGCAGTGCATCCGGGGCGTAGCCGA  
CGTGATGGCCTCTAAGGACCCTATGAACGGTGCACGACG

>ITS.405\_3\_C1R

GGAAGTAAAAGTCGTAACAAGGTTTCCGTAGGTGAACCTGCGGAAGGATCATTGTCTGTGA  
CCCTGACCAAAATAGACCGTGCACGCGTCATCCAGCCC GCCGGCGGGCACCCTTCGTC  
GCTCGGCCAAGTCTCGACAACCTCCTCTCCTCGGAGTGGGGGCTCGGGGTAAAAGAACC  
CACGACGCCTAAGGCGTCAAGGAACACTGTGCCTAGCCGGGGACGCGGACGGCTTGCTG  
GCCGCCCCCGTGCTGCAATGCTATTTAATCCACACGACTCTCGGCAACGGATATCTCGG  
CTCTCGCATCGATGAAGAACGTAGCGAAATGCGATACCTGGTGTGAATTGCAGAATCCCG  
CGAACCATCGAGTCTTTGAACGCAAGTTGCGCCCCGAGGCCATTCGGCTGAGGGCACGCCT  
GCCTGGGCGTCACGCAAAAACACGCTCCCACACCCTCATCGGGTAGCGGGACGCGGCATGT  
GGTCCCCCGTAGCGCAAGCTGCGGTGGGCCGAAGATATGGCTGCCGGCGTATCGTGCCGG  
ACACAGCGCGTGGTGGGCGACCTCGCTTTACTTACCGCAGTGCATCCGGGGCGTAGCCGA  
CGTGATGGCCTCTAAGGACCCTTTGAACGGTGCACGACG



>ITS.405\_3\_C2F

GGAAGTAAAAGTCGTAACAAGGTTTCCGTAGGTGAACCTGCGGAAGGATCATTGTTCGTGA  
CCCTGACCAAATAGACCGTGCACGCGTCATCCAGCCTGCCGGCGGCGGCACCGTTTCGTG  
GCTCGGCCAAGTCCTCGACAACCTCCTCTCCTCGGAGTGGGGGCTCGGGGTAAAAGAACC  
CACGACGCCTAAGGCGTCAAGGAACACTGTGCCTAGCCGGGGACGCGGACGGCTTGCTG  
GCCGCCCCCGTGCTGCAATGCTATTTAATCCACACGACTCTCGGCAACGGATATCTCGG  
CTCTCGCATCGATGAAGAACGTAGCGAAATGCGATACCTGGTGTGAATTGCAGAATCCCG  
CGAACCATCGAGTCTTTGAACGCAAGTTGCGCCCCGAGGCCATTCGGCTGAGGGCACGCCT  
GCCTGGGCGTACGCAAAAACAGCTCCCACACCCTCATCGGGTAGCGGGACGCGGCATGT  
GGTCCCCCGTAGCGCAAGCTGCGGTGGGCCGAAGATATGGCTGCCGGCGTATCGTGCCGG  
ACACAGCGCGTGGTGGGCGACCTCGCTTTACTTACCGCAGTGCATCCGGGGCATAGCCGA  
CGTGATGGCCTCTAAGGACCCTATGAACGGTGCACACGACG

>ITS.405\_3\_C3R

GGAAGTAAAAGTCGTAACAAGGTTTCCGTAGGTGAACCTGCGGAAGGATCATTGTTCGTGA  
CCCTGACCAAATAGACCGTGCACGCGTCATCCACCCTGCCGGCGGCGGCACCGTTTCGTG  
GCTCGGCCAAGTCCTCGACAACCTCCTCTCCTCGGAGTGGGGGCTCGGGGTAAAAGAACC  
CACGACGCCTAAGGCGTCAAGGAACACTGTGCCTAGCCGGGGACGCGGACGGCTTGCTG  
GCCGCCCCCGTGCTGCAATGCTATTTAATCCACACGACTCTCGGCAACGGATATCTCGG  
CTCTCGCATCGATGAAGAACGTAGCGAAATGCGATACCTGGTGTGAATTGCAGAATCCCG  
CGAACCATCGAGTCTTTGAACGCAAGTTGCGCCCCGAGGCCATTCGGCTGAGGGCACGCCT  
GCCTGGGCGTACGCAAAAACAGCTCCCACACCCTCATCGGGTAGCGGGACGCGGCATGT  
GGTCCCCCGTAGCGCAAGCTGCGGTGGGCCGAAGATATGGCTGCCGGCGTATCGTGCCGG  
ACACAGCGCGTGGTGGGCGACCTCGCTTTACTTACCGCAGTGCATCCGGGGCGTAGCCGA  
CGTGATGGCCTCTAAGGACCCTATGAACGGTGCACACGACG

>ITS.405\_3\_C4Frc

GGAAGTAAAAGTCGTAACAAGGTTTCCGTAGGTGAACCTGCGGAAGGATCATTGTTCGTGA  
CCCTGACCAAATAGACCGTGCACGCGTCATCCAGCCTGCCGGCGGCGGCACCGTTTCGTG  
GCTCGGCCAAGTCCTCGACAACCTCCTCTCCTCGGAGTGGGGGCTCGGGGTAAAAGAACC  
CACGACGCCTAAGGCGTCAAGGAACACTGTGCCTAGCCGGGGACGCGGACGGCTTGCTG  
GCCGCCCCCGTGCTGCAATGCTATTTAATCCACACGACTCTCGGCAACGGATATCTCGG  
CTCTCGCATCGATGAAGAACGTAGCGAAATGCGATACCTGGTGTGAATTGCAGAATCCCG  
CGAACCATCGAGTCTTTGAACGCAAGTTGCGCCCCGAGGCCATTCGGTTGAGGGCACGCCT  
GCCTGGGCGTACGCAAAAACAGCTCCCACACCCTCATCGGGTAGCGGGACGCGGCATGT  
GGTCCCCCGTAGCGCAAGCTGCGGTGGGCCGAAGATATGGCTGCCGGCGTATCGTGCCGG  
ACACAGCGCGTGGTGGGCGACCTCGCTTTATTTACCGCAGTGCATCCGGGGCGTAGCCGA  
CGTGATGGCCTCTAAGGACCCTATGAACGGTGCACACGACG

>ITS.405\_3\_C5Frc

GGAAGTAAAAGTCGTAACAAGGTTTCCGTAGGTGAACCTGCGGAAGGATCATTGTTCGTGA  
CCCTGACCAAATAGACCGTGCACGCGTCATCCAGCCTGCCGGCGGCGGCACCGTTTCGTG  
GCTCGGCCAAGTCCTCGACAACCTCCTCTCCACGGAGTGGGGGCTCGGGGTAAAAGAACC  
CACGACGCCTAAGGCGTCAAGGAACACTGTGCCTAGCCGGGGACGCGGACGGCTTGCTG  
GCCGCCCCCGTGCTGCAATGCTATTTAATCCACACGACTCTCGGCAACGGATATCTCGG  
CTCTCGCATCGATGAAGAACGTAGCGAAATGCGATACCTGGTGTGAATTGCAGAATCCCG  
CGAACCATCGAGTCTTTGAACGCAAGTTGCGCCCCGAGGCCATTCGGCTGAGGGCACGCCT  
GCCTGGGCGTACGCAAAAACAGCTCCCACACCCTCATCGGGTAGCGGGACGCGGCATGT  
GGTCCCCCGTAGCGCAAGCTGCGGTGGGCCGAAGATATGGCTGCCGGCGTATCGTGCCGG  
ACACAGCGCGTGGTGGGCGACCTCGCTTTACTTACCGCAGTGCATCCGGGGCGTAGCCGA  
CGTGATGGCCTCTAAGGACCCTATGAACGGTGCACACGACG

>ITS.405\_3\_C6Frc

GGAAGTAAAAGTCGTAACAAGGTTTCCGTAGGTGAACCTGCGGAAGGATCATTGTTCGTGA  
CCCTGACCAAATAGACCGTGCACGCGTCATCCAGCCTGCCGGCGGCGGCACCGTTTCGTG  
GCTCGGCCAAGTCCTCGACAACCTCCTCTCCACGGAGTGGGGGCTCGGGGTAAAAGAACC  
CACGACGCCTAAGGCGTCAAGGAACACTGTGCCTAGCCGGGGACGCGGACGGCTTGCTG  
GCCGCCCCCGTGCTGCAATGCTATTTAATCCACACGACTCTCGGCAACGGATATCTCGG  
CTCTCGCATCGATGAAGAACGTAGCGAAATGCGATACCTGGTGTGAATTGCAGAATCCCG  
CGAACCATCGAGTCTTTGAACGCAAGTTGCGCCCCGAGGCCATTCGGCTGAGGGCACGCCT  
GCCTGGGCGTACGCAAAAACAGCTCCCACACCCTCATCGGGTAGCGGGACGCGGCATGT  
GGTCCCCCGTAGCGCAAGCTGCGGTGGGCCGAAGATATGGCTGCCGGCGTATCGTGCCGG  
ACACAGCGCGTGGTGGGCGACCTCGCTTTACTTACCGCAGTGCATCCGGGGCGTAGCCGA  
CGTGATGGCCTCTAAGGACCCTATGAACGGTGCACACGACG

CTCTCGCATCGATGAAGAACGTAGCGAAATGCGATACCTGGTGTGAATTGCAGAATCCCG  
CGAACCATCGAGTCTTTGAACGCAAGTTGCGCCCCGAGGCCATTCGGCTGAGGGCACGCC  
GCCTGGGCGTCACGCAAAACACGCTCCCACACCCTCATCGGGTAGCGGGACGCGGCATGT  
GGTCCCCCGTAGCGCAAGCTGCGGTGGGCCGAAGATATGGCTACCGGCGTATCGTGCCGG  
ACACAGCGCGTGGTGGGCGACCTCGCTTTACTTACCGCAGTGCATCCGGGGCGTAGCCGA  
CGTGATGGCCTCTAAGGACCCTATGAACGGTGCACGACG

>ITS.405\_3\_C7Frc

GGAAGTAAAAGTCGTAACAAGGTTTCCGTAGGTGAACCTGCGGAAGGATCATTGTCTGTGA  
CCCTGACCAAATAGACCGTGCACGCGTCATCCAGCCTGCCGGCGGGCACCCTTCGTC  
GCTCGGCCAAGTCTCGACAACCTCCTCTCCTCGGAGTGGGGGCTCGGGGTAAAAGAACC  
CACGACGCCTAAGGCGTCAAGGAACACTGTGCCTAGCCGGGGACGCGGACGGCTTGCTG  
GCCGCCCCCGTGCTGCAATGCTATTTAATCCACACGACTCTCGGCAACGGATATCTCGG  
CTCTCGCATCGATGAAGAACGTAGCGAAATGCGATACCTGGTGTGAATTGCAGAATCCCG  
CGAACCATCGAGTCTTTGAACGCAAGTTGCGCCCCGAGGCCATTCGGTTGAGGGCACGCC  
GCCTGGGCGTCACGCAAAACACGCTCCCACACCCTCATCGGGTAGCGGGACGCGGCATGT  
GGTCCCCCGTAGCGCAAGCTGCGGTGGGCCGAAGATATGGCTGCCGGCGTATCGTGCCGG  
ACACAGCGCGTGGTGGGCGACCTCGCTTTACTTACCGCAGTGCATCCGGGGCGTAGCCGA  
CGTGATGGCCTCTAAGGACCCTTTGAACGGTGCACGACG

>ITS.405\_3\_C8Frc

GGAAGTAAAAGTCGTAACAAGGTTTCCGTAGGTGAACCTGCGGAAGGATCATTGTCTGTGA  
CCCTGACCAAATAGACCGTGCACGCGTCATCCAGCCTGCCGGCGGGCACCCTTCGTC  
GCTCGGCCAAGTCTCGACAACCTCCTCTCCTCGGAGTGGGGGCTCGGGGTAAAAGAACC  
CACGACGCCTAAGGCGTCAAGGAACACTGTGCCTAGCCGGGGACGCGGACGGCTTGCTG  
GCCGCCCCCGTGCTGCAATGCTATTTAATCCACACGACTCTCGGCAACGGATATCTCGG  
CTCTCGCATCGATGAAGAACGTAGCGAAATGCGATACCTGGTGTGAATTGCAGAATCCCG  
CGAACCATCGAGTCTTTGAACGCAAGTTGCGCCCCGAGGCCATTCGGCTGAGGGCACGCC  
GCCTGGGCGTCACGCAAAACACGCTCCCACACCCTCATCGGGTAGCGGGACGCGGCATGT  
GGTCCCCCGTAGCGCAATCTGCGGTGGGCCGAAGATATGGCTGCCGGCGTATCGTGCCGG  
ACACAGCGCGTGGTGGGCGACCTCGCTTTACTTACCGCAGTGCATCCGGGGCGTAGCCGA  
CGTGATGGCCTCTAAGGACCCTTTGAACGGTGCACGACG

>ITS.405\_4\_C1R

GGAAGTAAAAGTCGTAACAAGGTTTCCGTAGGTGAACCTGCGGAAGGATCATTGTCTGTGA  
CCCTGACCAAATAGACCGTGCACGCGTCATCCAGCCTGCCGGCGGGCACCCTTCGTC  
GCTCGGCCAAGTCTCGACAACCTCCTCTCCTCGGAGTGGGGGCTCGGGGTAAAAGAACC  
CACGACGCCTAAGGCGTCAAGGAACACTGTGCCTAGCCGGGGACGCGGACGGCTTGCTG  
GCCGCCCCCGTGCTGCAATGCTATTTAATCCACACGACTCTCGGCAACGGATATCTCGG  
CTCTCGCATCGATGAAGAACGTAGCGAAATGCGATACCTGGTGTGAATTGCAGAATCCCG  
CGAACCATCGAGTCTTTGAACGCAAGTTGCGCCCCGAGGCCATTCGGTTGAGGGCACGCC  
GCCTGGGCGTCACGCAAAACACGCTCCCACACCCTCATCGGGTAGCGGGACGCGGCCTGT  
GGTCCCCCGTAGCGCAAGCTGCGGTGGGCCGAAGATATGGCTGCCGGCGTATCGTGCCGG  
ACACAGCGCGTGGTGGGCGACCTCGCTTTACTTACCGCAGTGCATCCGGGGCGTAGCCGA  
CGTGATGGCCTCTAAGGACCCTTTGAACGGTGCACGACG

>ITS.405\_4\_C3R

GGAAGTAAAAGTCGTAACAAGGTTTCCGTAGGTGAACCTGCGGAAGGATCATTGTCTGTGA  
CCCTGACCAAATAGACCGTGCACGCGTCATCCAGCCTGCCGGCGGGCACCCTTCGTC  
GCTCGGCCAAGTCTCGACAACCTCCTCTCCTCGGAGTGGGGGCTCGGGGTAAAAGAACC  
CACGACGCCTAAGGCGTCAAGGAACACTGTGCCTAGCCGGGGACGCGGACGGCTTGCTG  
GCCGCCCCCGTGCTGCGATGCTATTTAATCCACACGACTCTCGGCAACGGATATCTCGG  
CTCTCGCATCGATGAAGAACGTAGCGAAATGCGATACCTGGTGTGAATTGCAGAATCCCG  
CGAACCATCGAGTCTTTGAACGCAAGTTGCGCCCCGAGGCCATTCGGCTGAGGGCACGCC  
GCCTGGGCGTCACGCAAAACACGCTCCCACACCCTCATCGGGTAGCGGGACGCGGCATGT  
GGTCCCCCGTAGCGCAAGCTGCGGTGGGCCGAAGATATGGCTGCCGGCGTATCGTGCCGG  
ACACAGCGCGTGGTGGGCGACCTCGCTTTACTTACCGCAGTGCATCCGGGGCGTAGCCGA  
CGTGATGGCCTCTAAGGACCCTATGAACGGTGCACGACG

>ITS.405\_4\_C4R

GGAAGTAAAAGTCGTAACAAGGTTTCCGTAGGTGAACCTGCGGAAGGATCATTGTTCGTGA  
CCCTGACCAAATAGACCGTGCACGCGTCATCCAGCCTGCCGGCGGCGGCACCGTTTCGTG  
GCTCGGCCAAGTCCTCGACAACCTCCTCTCCTCGGAGTGGGGGCTCGGGGTAAAAGAACC  
CACGACGCCTAAGGCGTCAAGGAACACTGTGCCTAGCCGGGGACGCGGACGGCTTGCTG  
GCCGCCCCCGTGCTGCAATGCTATTTAATCCACACGACTCTCGGCAACGGATATCTCGG  
CTCTCGCATCGATGAAGAACGTAGCGAAATGCGATACCTGGTGTGAATTGCAGAATCCCG  
CGAACCATCGAGTCTTTGAACGCAAGTTGCGCCCCGAGGCCATTCGGTTGAGGGCACGCCT  
GCCTGGGCGTCACGCAAAACACGCTCCCACACCCTCATCGGGTAGCGGGACGCGGCCTGT  
GGTCCCCCGTAGCGCAAGCTGCGGTGGGCCGAAGATATGGCTGCCGGCGTATCGTGCCGG  
ACACAGCGCGTGGTGGGCGACCTCGCTTTACTTACCGCAGTGCATCCGGGGCGTAGCCGA  
CGTGATGGCCTCTAAGGACCCCTTTGAACGGTGCACACGACG

>ITS.405\_4\_C5Frc

GGAAGTAAAAGTCGTAACAAGGTTTCCGTAGGTGAACCTGCGGAAGGATCATTGTTCGTGA  
CCCTGACCAAATAGACCGTGCACGCGTCATCCAGCCTGCCGGCGGCGGCACCGTTTCGTG  
GCTCGGCCAAGTCCTCGACAACCTCCTCTCCTCGGAGTGGGGGCTCGGGGTAAAAGAACC  
CACGACGCCTAAGGCGTCAAGGAACACTGTGCCTAGCTCGGGGACGCGGACGGCTTGCTG  
GCCGCCCCCTCGTGCTGCAATGCTATTTAATCCACACGACTCTCGGCAACGGATATCTCGG  
CTCTCGCATCGATGAAGAACGTAGCGAAATGCGATACCTGGTGTGAATTGCAGAATCCCG  
CGAACCATCGAGTCTTTGAACGCAAGTTGCGCCCCGAGGCCATTCGGTTGAGGGCACGCCT  
GCCTGGGCGTCACGCAAAACACGCTCCCACACCCTCATCGGGTAGCGGGACGCGGCATGT  
GGTCCCCCGTAGCGCAAGCTGCGGTGGGCCGAAGATATGGCTGCCGGCGTATCGTGCCGG  
ACACAGCGCGTGGTGGGCGACCTCGCTTTACTTACCGCAGTGCATCCGGGGCGTAGCCGA  
CGTGATGGCCTCTAAGGACCCCTTTGAACGGTGCACACGACG

>ITS.405\_4\_C6F

GGAAGTAAAAGTCGTAACAAGGTTTCCGTAGGTGAACCTGCGGAAGGATCATTGTTCGTGA  
CCCTGACCAAATAGACCGTGCACGCGTCATCCAGCCTGCCGGCGGCGGCACCGTTTCGTG  
GCTCGGCCAAGTCCTCGACAACCTCCTCTCCTCGGAGTGGGGGCTCGGGGTAAAAGAACC  
CACGACGCCTAAGGCGTCAAGGAACACTGTGCCTAGCTCGGGGACGCGGACGGCTTGCTG  
GCCGCCCCCTCGTGCTGCAATGCTATTTAATCCACACGACTCTCGGCAACGGATATCTCGG  
CTCTCGCATCGATGAAGAACGTAGCGAAATGCGATACCTGGTGTGAATTGCAGAATCCCG  
CGAACCATCGAGTCTTTGAACGCAAGTTGCGCCCCGAGGCCATTCGGCTGAGGGCACGCCT  
GCCTGGGCGTCACGCAAGACACGCTCCCACACCCTCATCGGGTAGCGGGACGCGGCATGT  
GGTCCCCCGTAGCGCAAGCTGCGGTGGGCCGAAGATATGGCTGCCGGCGTATCGTGCCGG  
ACACAGCGCGTGGTGGGCGACCTCGCTTTACTTACCGCAGTGCATCCGGGGCGTAGCCGA  
CGTGATGGCCTCTAAGGACCCCTATGAACGGTGCACACGACG

>ITS.405\_4\_C7Frc

GGAAGTAAAAGTCGTAACAAGGTTTCCGTAGGTGAACCTGCGGAAGGATCATTGTTCGTGA  
CCCTGACCAAATAGACCGTGCACGCGTCATCCAGCCTGCCGGCGGCGGCACCGTTTCGTG  
GCTCGGCCAAGTCCTCGACAACCTCCTCTCCTCGGAGTGGGGGCTCGGGGTAAAAGAACC  
CACGACGCCTAAGGCGTCAAGGAACACTGTGCCTAGCCGGGGACGCGGACGGCTTGCTG  
GCCGCCCCCGTGCTGCAATGCTATTTAATCCACACGACTCTCGGCAACGGATATCTCGG  
CTCTCGCATCGATGAAGAACGTAGCGAAATGCGATACCTGGTGTGAATTGCAGAATCCCG  
CGAACCATCGAGTCTTTGAACGCAAGTTGCGCCCCGAGGCCATTCGGCTGAGGGCACGCCT  
GCCTGGGCGTCACGCAAAACACGCTCCCACACCCTCATCGGGTAGCGGGACGCGGCATGT  
GGTCCCCCGTAGCGCAAGCTGCGGTGGGCCGAAGATATGGCTGCCGGCGTATCGTGCCGG  
ACACAGCGCGTGGTGGGCGACCTCGCTTTACTTACCGCAGTGCATCCGGGGCGTAGCCGA  
CGTGATGGCCTCTAAGGACCCCTTTGAACGGTGCACACGACG

>ITS.405\_4\_C8Frc

GGAAGTAAAAGTCGTAACAAGGTTTCCGTAGGTGAACCTGCGGAAGGATCATTGTTCGTGA  
CCCTGACCAAATAGACCGTGCACGCGTCATCCAGCCTGCCGGCGGCGGCACCGTTTCGTG  
GCTCGGCCAAGTCCTCGACAACCTCCTCTCCTCGGAGTGGGGGCTCGGGGTAAAAGAACC  
CACGACGCCTAAGGCGTCAAGGAACACTGTGCCTAGCCGGGGACGCGGACGGCTTGCTG  
GCCGCCCCCGTGCTGCAATGCTATTTAATCCACACGACTCTCGGCAACGGATATCTCGG  
CTCTCGCATCGATGAAGAACGTAGCGAAATGCGATACCTGGTGTGAATTGCAGAATCCCG  
CGAACCATCGAGTCTTTGAACGCAAGTTGCGCCCCGAGGCCATTCGGCTGAGGGCACGCCT  
GCCTGGGCGTCACGCAAAACACGCTCCCACACCCTCATCGGGTAGCGGGACGCGGCATGT  
GGTCCCCCGTAGCGCAAGCTGCGGTGGGCCGAAGATATGGCTGCCGGCGTATCGTGCCGG  
ACACAGCGCGTGGTGGGCGACCTCGCTTTACTTACCGCAGTGCATCCGGGGCGTAGCCGA  
CGTGATGGCCTCTAAGGACCCCTTTGAACGGTGCACACGACG

CTCTCGCATCGATGAAGAACGTAGCGAAATGCGATACCTGGTGTGAATTGCAGAATCCCG  
CGAACTATCGAGTCTTTGAACGCAAGTTGCGCCCCGAGGCCATTCGGCTGAGGGCACGCCT  
GCCTGGGCGTCACGCAAAACACGCTCCCACACCCTCATCGGGTAGCGGGACGCGGCATGT  
GGTCCCCCGTAGCGCAAGCTGCGGTGGGCCGAAGATATGGCTGCCGGCGTATCGTGCCGG  
ACACAGCGCGTGGTGGGCGACCTCGCTTTACTTACCGCAGTGCATCCGGGGCGTAGCCGA  
CGTGATGGCCTCTAAGGACCCTATGAACGGTGCACACGACG

>ITS.405\_4\_C9Frc

GGAAGTAAAAGTTCGTAACAAGGTTTCCGTAGGTGAACCTGCGGAAGGATCATTGTCTGTGA  
CCCTGACCAAATAGACCGTGCACGCGTCATCCAGCCTGCCGGCGGGCGGCACCGTTTCGTC  
GCTCGGCCAAGTCTCGACAACCTCCTCTCCTCGGAGTGGGGGCTCGGGGTAAAAGAACC  
CACGACGCCTAAGGCGTCAAGGAACACTGTGCCTAGCCCGGGGACGCGGACGGCTTGCTG  
GCCGCCCCCGTGCTGCAATGCTATTTAATCCACACGACTCTCGGCAACGGATATCTCGG  
CTCTCGCATCGATGAAGAACGTAGCGAAATGCGATACCTGGTGTGAATTGCAGAATCCCG  
CGAACCATCGAGTCTTTGAACGCAAGTTGCGCCCCGAGGCCATTCGGTTGAGGGCACGCCT  
GCCTGGGCGTCACGCAAAACACGCTCCCACACCCTCATCGGGTAGCGGGACGCGGCATGT  
GGTCCCCCGTAGCGCAAGCTGCGGTGGGCCGAAGATATGGCTGCCGGCGTATCGTGCCGG  
ACACAGCGCGTGGTGGGCGACCTCGCTTTACTTACCGCAGTGCATCCGGGGCGTAGCCGA  
CGTGATGGCCTCTAAGGACCCTTTGAACGGTGCACACGACG

>ITS.M543\_C1R

GGAAGTAAAAGTTCGTAACAAGGTTTCCGTAGGTGAACCTGCGGAAGGATCATTGTCTGTGA  
CCCTGACCAAATAGACCGTGCACGCGTCATCCAGCCTGCCGGCGGGCGGCACCGTTTCGTC  
GCTCGGCCAAGTCTCGACAACCTCCTCTCCTCGGAGTGGGGGCTCGGGGTAAAAGAACC  
CACGACGCCTAAGGCGTCAAGGAACACTGTGCCTAGCTCGGGGACGCGGACGGCTTGCTG  
GCCGCCCCCGTGCTGCAATGCTATTTAATCCACACGACTCTCGGCAACGGATATCTCGG  
CTCTCGCATCGATGAAGAACGTAGCGAAATGCGATACCTGGTGTGAATTGCAGAATCCCG  
CGAACCATCGAGTCTTTGAACGCAAGTTGCGCCCCGAGGCCATTCGGCTGAGGGCACGCCT  
GCCTGGGCGTCACGCAAAACACGCTCCCACACCCTCATCGGGTAGCGGGACGCGGCATGT  
GGTCCCCCGTAGCGCAAGCTGCGGTGGGCCGAAGATATGGCTGCCGGCGTATCGTGCCGG  
ACACAGCGCGTGGTGGGCGACCTCGCTTTACTTACCGCAGTGCATCCGGGGCGTAGCCGA  
CGTGATGGCCTCTAAGGACCCTATGAACGGTGCACACGACG

>ITS.M543\_C2R

GGAAGTAAAAGTTCGTAACAAGGTTTCCGTAGGTGAACCTGCGGAAGGATCATTGTCTGTGG  
CCCTGACCAAATAGACCGTGCACGCGTCATCCAGCCTGCCGGCGGGCGGCACCGTTTCGTC  
GCTCGGCCAAGTCTCGACAACCTCCTCTCCTCGGAGTGGGGGCTCGGGGTAAAAGAACC  
CACGACGCCTAAGGCGTCAAGGAACACTGTGCCTAGCCCGGGGACGCGGACGGCTTGCTG  
GCCGCCCCCGTGCTGCAATGCTATTTAATCCACACGACTCTCGGCAACGGATATCTCGG  
CTCTCGCATCGATGAAGAACGTAGCGAAATGCGATACCTGGTGTGAATTGCAGAATCCCG  
CGAACCATCGAGTCTTTGAACGCAAGTTGCGCCCCGAGGCCATTCGGCTGAGGGCACGCCT  
GCCTGGGCGTCACGCGAAAACACGCTCCCACACCCTCATCGGGTAGCGGGACGCGGCATGT  
GGTCCCCCGTAGCGCAAGCTGCGGTGGGCCGAAGATATGGCTGCCGGCGTATCGTGCCGG  
ACACAGCGCGTGGTGGGCGACCTCGCTTTACTTACCGCAGTGCATCCGGGGCGTAGCCGA  
CGTGATGGCCTCTAAGGACCCTTTGAACGGTGCACACGACG

>ITS.M543\_C3R

GGAAGTAAAAGTTCGTAACAAGGTTTCCGTAGGTGAACCTGCGGAAGGATCATTGTCTGTGA  
CCCTGACCAAATAGACCGTGCACGCGTCATCCAGCCTGCCGGCGGGCGGCACCGTTTCGTC  
GCTCGGCCAAGTCTCGACAACCTCCTCTCCACGAGTGGGGGCTCGGGGTAAAAGAACC  
CACGACGCCTAAGGCGTCAAGGAACACTGTGCCTAGCCCGGGGACGCGGACGGCTTGCTG  
GCCGCCCCCGTGCTGCAATGCTATTTAATCCACACGACTCTCGGCAACGGATATCTCGG  
CTCTCGCATCGATGAAGAACGTAGCGAAATGCGATACCTGGTGTGAATTGCAGAATCCCG  
CGAACCATCGAGTCTTTGAACGCAAGTTGCGCCCCGAGGCCATTCGGCTGAGGGCACGCCT  
GCCTGGGCGTCACGCAAAACACGCTCCCACACCCTCATCGGGTAGCGGGACGCGGCATGT  
GGTCCCCCGTAGCGCAAGCTGCGGTGGGCCGAAGATATGGCTGCCGGCGTATCGTGCCGG  
ACACAGCGCGTGGTGGGCGACCTCGCTTTACTTACCGCAGTGCATCCGGGGCGTAGCCGA  
CGTGATGGCCTCTAAGGACCCTTTGAACGGTGCACACGACG

>ITS.M543\_C4Frc\_rev  
GGAAGTAAAAGTTCGTAACAAGGTTTCCGTAGGTGAACCTGCGGAAGGATCATTGTTCGTGA  
CCCTGACCAAATAGACCGTGCACGCGTCATCCAGCCTGCCGGCGGCGGCACCGTTTCGT  
GCTCGGCCAAGTTCCTCGACAACCTCCTCTCCTCGGAGTGGGGGCTCGGGGTAAAAGAACC  
CACGACGCCTAAGGCGTCAAGGAACACTGTGCCTAGCCGGGGACGCGGACGGCTTGCTG  
GCCGCCCCCGTGCTGCAATGCTATTTAATCCACACGACTCTCGGCAACGGATATCTCGG  
CTCTCGCATCGATGAAGAACGTAGCGAAATGCGATACCTGGTGTGAATTGCAGAATCCCC  
CGAACCATCGAGTCTTTGAACGCAAGTTGCGCCCCGAGGCCATTCGGCTGAGGGCACGCCT  
GCCTGGGCGTACGCAAAAACAGCTCCCACACCCTCATCGGGTAGCGGGACGCGGCATGT  
GGTCCCCCGTAGCGCAAGCTGCGGTGGGCCGAAGATATGGCTGCCGGCGTATCGTGCCGG  
ACACAGCGCGTGGTGGGCGACCTCGCTTTACTTACCGCAGTGCATCCGGGGCGTAGCCGA  
CGTGATGGCCTCTAAGGACCCCTATGAACGGTGCACACGACG

>ITS.M543\_C5F  
GGAAGTAAAAGTTCGTAACAAGGTTTCCGTAGGTGAACCTGCGGAAGGATCATTGTTCGTGA  
CCCTGACCAAATAGACCGTGCACGCGTCATCCAGCCTGCCGGCGGCGGCACCGTTTCGT  
GCTCGGCCAAGTTCCTCGACAACCTCCTCTCCTCGGAGTGGGGGCTCGGGGTAAAAGAACC  
CACGACGCCTAAGGCGTCAAGGAACACTGTGCCTAGCCGGGGACGCGGACGGCTTGCTG  
GCCGCCCCCGTGCTGCAATGCTATTTAATCCACACGACTCTCGGCAACGGATATCTCGG  
CTCTCGCATCGATGAAGAACGTAGCGAAATGCGATACCTGGTGTGAATTGCAGAATCCCC  
CGAACCATCGAGTCTTTGAACGCAAGTTGCGCCCCGAGGCCATTCGGCTGAGGGCACGCCT  
GCCTGGGCGTACGCAAAAACAGCTCCCACACCCTCATCGGGTAGCGGGACGCGGCATGT  
GTTTCCCCCGTAGCGCAAGCTGCGGTGGGCCGAAGATATGGCTGCCGGCGTATCGTGCCGG  
ACACAGCGCGTGGTGGGCGACCTCGCTTTACTTACCGCAGTGCATCCGGGGCGTAGCCGA  
CGTGATGGCCTCTAAGGACCCCTTTGAACGGTGCACACGACG

>ITS.M543\_C6F  
GGAAGTAAAAGTTCGTAACAAGGTTTCCGTAGGTGAACCTGCGGAAGGATCATTGTTCGTGA  
CCCTGACCAAATAGACCGTGCACGCGTCATCCAGCCTGCCGGCGGCGGCACCGTTTCGT  
GCTCGGCCAAGTTCCTCGACAACCTCCTCTCCTCGGAGTGGGGGCTCGGGGTAAAAGAACC  
CACGACGCCTAAGGCGTCAAGGAACACTGTGCCTAGCCGGGGACGCGGACGGCTTGCTG  
GCCGCCCCCGTGCTGCAATGCTATTTAATCCACACGACTCTCGGCAACGGATATCTCGG  
CTCTCGCATCGATGAAGAACGTAGCGAAATGCGATACCTGGTGTGAATTGCAGAATCCCC  
CGAACCATCGAGTCTTTGAACGCAAGTTGCGCCCCGAGGCCATTCGGCTGAGGGCACGCCT  
GCCTGGGCGTACGCAAAAACAGCTCCCACACCCTCATCGGGTAGCGGGACGCGGCATGT  
GGTCCCCCGTAGCGCAAGCTGCGGTGGGCCGAAGATATGGCTGCCGGCGTATCGTGCCGG  
ACACAGCGCGTGGTGGGCGACCTCGCTTTACTTACCGCAGTGCATCCGGGGCGTAGCCGA  
CGTGATGGCCTCTAAGGACCCCTTTGAACGGTGCACACGACG

>ITS.M543\_C7Frc\_rev  
GGAAGTAAAAGTTCGTAACAAGGTTTCCGTAGGTGAACCTGCGGAAGGATCATTGTTCGTGA  
CCCTGACCAAATAGACCGTGCACGCGTCATCCAGCCTGCCGGCGGCGGCACCGTTTCGT  
GCTCGGCCAAGTTCCTCGACAACCTCCTCTCCTCGGAGTGGGGGCTCGGGGTAAAAGAACC  
CACGACGCCTAAGGCGTCAAGGAACACTGTGCCTAGCCGGGGACGCGGACGGCTTGCTG  
GCCGCCCCCGTGCTGCAATGCTATTTAATCCACACGACTCTCGGCAACGGATATCTCGG  
CTCTCGCATCGATGAAGAACGTAGCGAAATGCGATACCTGGTGTGAATTGCAGAATCCCC  
CGAACCATCGAGTCTTTGAACGCAAGTTGCAACCCGAGGCCATTCGGCTGAGGGCACGCCT  
GCCTGGGCGTACGCAAAAACAGCTCCCACACCCTCATCGGGTAGCGGGACGCGGCATGT  
GGTCCCCCGTAGCGCAAGCTGCGGTGGGCCGAAGATATGGCTGCCGGCGTATCGTGCCGG  
ACACAGCGCGTGGTGGGCGACCTCGCTTTACTTACCGCAGTGCATCCGGGGCGTAGCCGA  
CGTGATGGCCTCTAAGGACCCCTATGAACGGTGCACACGACG

>ITS.M543\_C8F  
GGAAGTAAAAGTTCGTAACAAGGTTTCCGTAGGTGAACCTGCGGAAGGATCATTGTTCGTGA  
CCCTGACCAAATAGACCGTGCACGCGTCATCCAGCCTGCCGGCGGCGGCACCGTTTCGT  
GCTCGGCCAAGTTCCTCGACAACCTCCTCTCCACGGAGTGGGGGCTCGGGGTAAAAGAACC  
CACGACGCCTAAGGCGTCAAGGAACACTGTGCCTAGCCGGGGACGCGGACGGCTTGCTG  
GCCGCCCCCGTGCTGCAATGCTATTTAATCCACACGACTCTCGGCAACGGATATCTCGG  
CTCTCGCATCGATGAAGAACGTAGCGAAATGCGATACCTGGTGTGAATTGCAGAATCCCC  
CGAACCATCGAGTCTTTGAACGCAAGTTGCAACCCGAGGCCATTCGGCTGAGGGCACGCCT  
GCCTGGGCGTACGCAAAAACAGCTCCCACACCCTCATCGGGTAGCGGGACGCGGCATGT  
GGTCCCCCGTAGCGCAAGCTGCGGTGGGCCGAAGATATGGCTGCCGGCGTATCGTGCCGG  
ACACAGCGCGTGGTGGGCGACCTCGCTTTACTTACCGCAGTGCATCCGGGGCGTAGCCGA  
CGTGATGGCCTCTAAGGACCCCTATGAACGGTGCACACGACG

CTCTCGCATCGATGAAGAACGTAGCGAAATGCGATACCTGGTGTGAATTGCAGAATCCCG  
CGAACCATCGAGTCTTTGAACGCAAGTTGCGCCCCGAGGCCATTCGGCTGAGGGCACGCCT  
GCCTGGGCGTCACGCAAAAACACGCTCCCACACCCTCATCGGGTAGCGGGACGCGGCATGT  
GGTCCCCCGTAGCGCAAGCTGCGGTGGGCCGAAGATATGGCTGCCGGCGTATCGTGCCGG  
ACACAGCGCGTGGTGGGCGACCTCGCTTTACTTACCGCAGTGCATCCGGGGCGTAGCCGA  
CGTGATGGCCTCTAAGGACCCCTATGAACGGTGCACACGACG

>ITS.M627\_C1F

GGAAGTAAAAGTTCGTAACAAGGTTTCCGTAGGTGAACCTGCGGAAGGATCATTGTTCGTGA  
CCCTGACCAAAATAGACCGTGCACGCGTCATCCAGCCTGCCGGCGGGCACCCTTCGTC  
GCTCGGCCAAGTCTTCGACAACCTCCTCTCCTCGGAGTGGGGGCTCGGGGTAAAAGAACC  
CACGACGCCTAAGGCGTCAAGGAACACTGTGCCTAGCCCGGGGACGCGGACGGCTTGCTG  
GCCGCCCCCGTGCTGCAATGCTATTTAATCCACACGACTCTCGGCAACGGATATCTCGG  
CTCTCGCATCGATGAAGAACGTAGCGAAATGCGATACCTGGTGTGAATTGCAGAATCCCG  
CGAACCATCGAGTCTTTGAACGCAAGTTGCGCCCCGAGGCCATTCGGCTGAGGGCACGCCT  
GCCTGGGCGTCACGCAAAAACACGCTCCCACACCCTCATCGGGTAGCGGGACGCGGCCTTG  
GGTCCCCCGTAGCGCAAGCTGCGGTGGGCCGAAGATATGGCTGCCGGCGTATCGTGCCGG  
ACACAGCGCGTGGTGGGCGACCTCGCTTTACTTACCGCAGTGCATCCGGGGCGTAGCCGA  
CGTGATGGCCTCTAAGGACCCCTATGAACGGTGCACACGACG

>ITS.M627\_C2F

GGAAGTAAAAGTTCGTAACAAGGTTTCCGTAGGTGAACCCGCGGAAGGATCATTGTTCGTGA  
CCCTGACCAAAATAGACCGTGCACGCGTCATCCAGCCTGCCGGCGGGCACCCTTCGTC  
GCTCGGCCAAGTCTTCGACAACCTCCTCTCCTCGGAGTGGGGGCTCGGGGTAAAAGAACC  
CACGACGCCTAAGGCGTCAAGGAACACTGTGCCTAGCCCGGGGACGCGGACGGCTTGCTG  
GCCGCCCCCGTGCTGCAATGCTATTTAATCCACACGACTCTCGGCAACGGATATCTCGG  
CTCTCGCATCGATGAAGAACGTAGCGAAATGCGATACCTGGTGTGAATTGCAGAATCCCG  
CGAACCATCGAGTCTTTGAACGCAAGTTGCGCCCCGAGGCCATTCGGCTGAGGGCACGCCT  
GCCTGGGCGTCACGCAAAAACACGCTCCCACACCCTCATCGGGTAGCGGGACGCGGCATGT  
GGTCCCCCGTAGCGCAAGCTGCGGTGGGCCGAAGATATGGCTGCCGGCGTATCGTGCCGG  
ACACAGCGCGTGGTGGGCGACCTCGCTTTACTTACCGTAGTGCATCCGGGGCGTAGCCGA  
CGTGATGGCCTCTAAGGACCCCTATGAACGGTGCACACGACG

>ITS.M627\_C3R

GGAAGTAAAAGTTCGTAACAAGGTTTCCGTAGGTGAACCTGCGGAAGGATCATTGTTCGTGA  
CCCTGACCAAAATAGACCGTGCACGCGTCATCCAGCCTGCCGGCGGGCACCCTTCGTC  
GCTCGGCCAAGTCTTCGACAACCTCCTCTCCTCGGAGTGGGGGCTCGGGGTAAAAGAACC  
CACGACGCCTAAGGCGTCAAGGAACACTGTGCCTAGCCCGGGGACGCGGACGGCTTGCTG  
GCCGCCCCCGTGCTGCAATGCTATTTAATCCACACGACTCTCGGCAACGGATATCTCGG  
CTCTCGCATCGATGAAGAACGTAGCGAAATGCGATACCTGGTGTGAATTGCAGAATCCCG  
CGAACCATCGAGTCTTTGAACGCAAGTTGCGCCCCGAGGCCATTCGGCTGAGGGCACGCCT  
GCCTGGGCGTCACGCAAAAACACGCTCCCACACCCTCATCGGGTAGCGGGACGCGGCCTTG  
GGTCCCCCGTAGCGCAAGCTGCGGTGGGCCGAAGATATGGCTGCCGGCGTATCGTGCCGG  
ACACAGCGCGTGGTGGGCGACCTCGCTTTACTTACCGTAGTGCATCCGGGGCGTAGCCGA  
CGTGATGGCCTCTAAGGACCCCTTTGAACGGTGCACACGACG

>ITS.M627\_C4F

GGAAGTAAAAGTTCGTAACAAGGTTTCCGTAGGTGAACCTGCGGAAGGATCATTGTTCGTGA  
CCCTGACCAAAATAGACCGTGCACGCGTCATCCAGCCTGCCGGCGGGCACCCTTCGTC  
GCTCGGCCAAGTCTTCGACAACCTCCTCTCCTCGGAGTGGGGGCTCGGGGTAAAAGAACC  
CACGATGCCTAAGGCGTCAAGGAACACTGTGCCTAGCCCGGGGACGCGGACGGCTTGCTG  
GCCGCCCCCGTGCTGCAATGCTATTTAATCCACACGACTCTCGGCAACGGATATCTCGG  
CTCTCGCATCGATGAAGAACGTAGCGAAATGCGATACCTGGTGTGAATTGCAGAATCCCG  
CGAACCATCGAGTCTTTGAACGCAAGTTGCGCCCCGAGGCCATTCGGCTGAGGGCACGCCT  
GCCTGGGCGTCACGCAAAAACACGCTCCCACACCCTCATCGGGTAGCGGGACGCGGCATGT  
GGTCCCCCGTAGCGCAAGCTGCGGTGGGCCGAAGATATGGCTGCCGGCGTACCGTGCCGG  
ACACAGCGCGTGGTGGGCGACCTCGCTTTACTTACCGCAGTGCATCCGGGGCGTAGCCGA  
CGTGATGGCCTCTAAGGACCCCTATGAACGGTGCACACGACG

>ITS.M627\_C5Frc\_rev  
GGAAGTAAAAGTCGTAAACAAGGTTTCCGTAGGTGAACCTGCGGAAGGATCATTGTTCGTGA  
CCCTGACCAAATAGACCGTGCACGCGTCATCCAGCCTGCCGGCGGCGGCACCGTTTCGTG  
GCTCGGCCAAGTCCTCGACAACCTCCTCTCCACGGAGTGGGGGCTCGGGGTAAAAGAACC  
CACGACGCCTAAGGCGTCAAGGAACACTGTGCCTAGCCGGGGACGCGGACGGCTTGCTG  
GCCGCCCCCGTGCTGCAATGCTATTTAATCCACACGACTCTCGGCAACGGATATCTCGG  
CTCTCGCACCAGTGAAGAACGTAGCGAAATGCGATACCTGGTGTGAATTGCAGAATCCCC  
CGAACCATCGAGTCTTTGAACGCAAGTTGCGCCCCGAGGCCATTCGGCTGAGGGCACGCCT  
GCCTGGGCGTCACGCAAAACACGCTCCCACACCCTCATCGGGTAGCGGGACGCGGCATGT  
GGTCCCCCGTAGCGCAAGCTGCGGTGGGCCGAAGATATGGCTGCCGGCGTATCGTGCCGG  
ACACAGCGCGTGGTGGGCGACCTCGCTTTACTTACCGCAGTGCATCCGGGGCGTAGCCGA  
CGTGATGGCCTCTAAGGACCCTATGAACGGTGCACACGACG

>ITS.M627\_C6Frc\_rev  
GGAAGTAAAAGTCGTAAACAAGGTTTCCGTAGGTGAACCTGCGGAAGGATCATTGTTCGTGA  
CCCTGACCAAATAGACCGTGCACGCGTCATCCAGCCTGCCGGCGGCGGCACCGTTTCGTG  
GCTCGGCCAAGTCCTCGACAACCTCCTCTCCTCGGAGTGGGGGCTCGGGGTAAAAGAACC  
CACGACGCCTAAGGCGTCAAGGAACACTGTGCCTAGCCGGGGACGCGGACGGCTTGCTG  
GCCGCCCCCGTGCTGCAATGCTATTTAATCCACACGACTCTCGGCAACGGATATCTCGG  
CTCTCGCATCGATGAAGAACGTAGCGAAATGCGATACCTGGTGTGAATTGCAGAATCCCC  
CGAACCATCGAGTCTTTGAACGCAAGTTGCGCCCCGAGGCCATTCGGCTGAGGGCACGCCT  
GCCTGGGCGTCACGCAAAACACGCTCCCACACCCTCATCGGGTAGCGGGACGCGGCATGT  
GGTCCCCCGTAGCGCAAGCTGCGGTGGGCCGAAGATATGGCTGCCGGCGTATCGTGCCGG  
ACACAGCGCGTGGTGGGCGACCTCGCTTTACTTACCGCAGTGCATCCGGGGCGTAGCCGA  
CGTGATGGCCTCTAAGGACCCTATGAACGGTGCACACGACG

>ITS.M627\_C7Frc\_rev  
GGAAGTAAAAGTCGTAAACAAGGTTTCCGTAGGTGAACCTGCGGAAGGATCATTGTTCGTGA  
CCCTGACCAAATAGACCGTGCACGCGTCATCCAGCCTGCCGGCGGCGGCACCGTTTCGTG  
GCTCGGCCAAGTCCTCGACAACCTCCTCTCCTCGGAGTGGGGGCTCGGGGTAAAAGAACC  
CACGACGCCTAAGGCGTCAAGGAACACTGTGCCTAGCCGGGGACGCGGACGGCTTGCTG  
GCCGCCCCCGTGCTGCAATGCTATTTAATCCACACGACTCTCGGCAACGGATATCTCGG  
CTCTCGCATCGATGAAGAACGTAGCGAAATGCGATACCTGGTGTGAATTGCAGAATCCCC  
CGAACCATCGAGTCTTTGAACGCAAGTTGCGCCCCGAGGCCATTCGGCTGAGGGCACGCCT  
GCCTGGGCGTCACGCAAAACACGCTCCCACACCCTCATCGGGTAGCGGGACGCGGCATGT  
GGTCCCCCGTAGCGCAAGCTGCGGTGGGCCGAAGATATGGCTGCCGGCGTATCGTGCCGG  
ACACAGCGCGTGGTGGGCGACCTCGCTTTACTTACCGCAGTGCATCCGGGGCGTAGCCGA  
CGTGATGGCCTCTAAGGACCCTTTGAACGGTGCACACGACG

>ITS.M627\_C8Frc\_rev  
GGAAGTAAAAGTCGTAAACAAGGTTTCCGTAGGTGAACCTGCGGAAGGATCATTGTTCGTGA  
CCCTGACCAAATAGACCGTGCACGCGTCATCCAGCCTGCCGGCGGCGGCACCGTTTCGTG  
GCTCGGCCAAGTCCTCGACAACCTCCTCTCCACGGAGTGGGGGCTCGGGGTAAAAGAACC  
CACGACGCCTAAGGCGTCAAGGAACACTGTGCCTAGCCGGGGACGCGGACGGCTTGCTG  
GCCGCCCCCGTGCTGCAATGCTATTTAATCCACACGACTCTCGGCAACGGATATCTCGG  
CTCTCGCATCGATGAAGAACGTAGCGAAATGCGATACCTGGTGTGAATTGCAGAATCCCC  
CGAACCATCGAGTCTTTGAACGCAAGTTGCGCCCCGAGGCCATTCGGCTGAGGGCACGCCT  
GCCTGGGCGTCACGCAAAACACGCTCCCACACCCTCATCGGGTAGCGGGACGCGGCATGT  
GGTCCCCCGTAGCGCAAGCTGCGGTGGGCCGAAGATATGGCTGCCGGCGTATCGTGCCGG  
ACACAGCGCGTGGTGGGCGACCTCGCTTTACTTACCGCAGTGCATCCGGGGCGTAGCCGA  
CGTGATGGCCTCTAAGGACCCTTTGAACGGTGCACACGACG

>ITS.M647\_C1F  
GGAAGTAAAAGTCGTAAACAAGGTTTCCGTAGGTGAACCTGCGGAAGGATCATTGTTCGTGA  
CCCTGACCAAATAGACCGTGCACGCGTCATCCAGCCTGCCGGCGGCGGCACCGTTTCGTG  
GCTCGGCCAAGTCCTCGACAACCTCCTCTCCTCGGAGTGGGGGCTCGGGGTAAAAGAACC  
CACGACGCCTAAGGCGTCAAGGAACACTGTGCCTAGCCGGGGACGCGGACGGCTTGCTG  
GCCGCCCCCGTGCTGCAATGCTATTTAATCCACACGACTCTCGGCAACGGATATCTCGG  
CTCTCGCATCGATGAAGAACGTAGCGAAATGCGATACCTGGTGTGAATTGCAGAATCCCC  
CGAACCATCGAGTCTTTGAACGCAAGTTGCGCCCCGAGGCCATTCGGCTGAGGGCACGCCT  
GCCTGGGCGTCACGCAAAACACGCTCCCACACCCTCATCGGGTAGCGGGACGCGGCATGT  
GGTCCCCCGTAGCGCAAGCTGCGGTGGGCCGAAGATATGGCTGCCGGCGTATCGTGCCGG  
ACACAGCGCGTGGTGGGCGACCTCGCTTTACTTACCGCAGTGCATCCGGGGCGTAGCCGA  
CGTGATGGCCTCTAAGGACCCTTTGAACGGTGCACACGACG

CTCTCGCATCGATGAAGAACGTAGCGAAATGCGATACCTGGTGTGAATTGCAGAATCCCG  
CGAACCATCGAGTCTTTGAACGCAAGTTGCGCCCCGAGGCCATTCGGTTGAGGGCACGCCT  
GCCTGGGCGTCACGCAAAACACGCTCCCACACCCTCATCGGGTAGCGGGACGCGGCATGT  
GGTCCCCCGTAGCGCAAGCTGCGGTGGGCCGAAGATATGGCTGCCGGCGTATCGTGCCGG  
ACACAGCGCGTGGTGGGCGACCTCGCTTTACTTACCGCAGTGCATCCGGGGCGTAGCCGA  
CGTGATGGCCTCTAAGGACCCTATGAACGGTGCACGACG

>ITS.M647\_C2R

GGAAGTAAAAGTTCGTAACAAGGTTTCCGTAGGTGAACCTGCGGAAGGATCATTGTTCGTGA  
CCCTGACCAAATAGACCGTGCACGCGTCATCCACCCTGCCGGCGGGCACCCTTCGTG  
GCTCGGCCAAGTCTCGACAACCTCCTCTCCTCGGAGTGGGGGCTCGGGTAAAAGAACC  
CACGACGCCTAAGGCGTCAAGGAACACTGTGCCTAGCCCGGGGACGCGGACGGCTTGCTG  
GCCGCCCCCGTGCTGCAATGCTATTTAATCCACACGACTCTCGGCAACGGATATCTCGG  
CTCCCGCATCGATGAAGAACGTAGCGAAATGCGATACCTGGTGTGAATTGCAGAATCCCG  
CGAACCATCGAGTCTTTGAACGCAAGTTGCGCCCCGAGGCCATTCGGCTGAGGGCACGCCT  
GCCTGGGCGTCACGCAAAACACGCTCCCACACCCTCATCGGGTAGCGGGACGCGGCATGT  
GGTCCCCCGTAGCGCAAGCTGCGGTGGGCCGAAGATATGGCTGCCGGCGTATCGTGCCGG  
ACACAGCGCGTGGTGGGCGACCTCGCTTTACTTACCGCAGTGCATCCGGGGCGTAGCCGA  
CGTGATGGCCTCTAAGGACCCTTTGAACGGTGCACGACG

>ITS.M647\_C3R

GGAAGTAAAAGTTCGTAACAAGGTTTCCGTAGGTGAACCTGCGGAAGGATCATTGTTCGTGA  
CCCTGACCAAATAGACCGTGCACGCGTCATCCAGCCTGCCGGCGGGCACCCTTCGTG  
GCTCGGCCAAGTCTCGACAACCTCCTCTCCTCGGAGTGGGGGCTCGGGTAAAAGAACC  
CACGACGCCTAAGGCGTCAAGGAACACTGTGCCTAGCCCGGGGACGCGGACGGCTTGCTG  
GCCGCCCCCGTGCTGCAATGCTATTTAATCCACACGACTCTCGGCAACGGATATCTCGG  
CTCTCGCATCGATGAAGAACGTAGCGAAATGCGATACCTGGTGTGAATTGCAGAATCCCG  
CGAACCATCGAGTCTTTGAACGCAAGTTGCGCCCCGAGGCCATTCGGCTGAGGGCACGCCT  
GCCTGGGCGTCACGCAAAACACGCTCCCACACCCTCATCGGGTAGCGGGACGCGGCATGT  
GGTCCCCCGTAGCGCAAGCTGCGGTGGGCCGAAGATATGGCTGCCGGCGTATCGTGCCGG  
ACACAGCGCGTGGTGGGCGACCTCGCTTTACTTACCGCAGTGCATCCGGGGCGTAGCCGA  
CGTGATGGCCTCTAAGGACCCTATGAACGGTGCACGACG

>ITS.M647\_C4Frc\_rev

GGAAGTAAAAGTTCGTAACAAGGTTTCCGTAGGTGAACCTGCGGAAGGATCATTGTTCGTGA  
CCCTGACCAAATAGACCGTGCACGCGTCATCCAGCCTGCCGGCGGGCACCCTTCGTG  
GCTCGGCCAAGTCTCGACAACCTCCTCTCCTCGGAGTGGGGGCTCGGGTAAAAGAACC  
CACGACGCCTAAGGCGTCAAGGAACACTGTGCCTAGCCCGGGGACGCGGACGGCTTGCTG  
GCCGCCCCCGTGCTGCAATGCTATTTAATCCACACGACTCTCGGCAACGGATATCTCGG  
CTCTCGCATCGATGAAGAACGTAGCGAAATGCGATACCTGGTGTGAATTGCAGAATCCCG  
CGAACCATCGAGTCTTTGAACGCAAGTTGCGCCCCGAGGCCATTCGGTTGAGGGCACGCCT  
GCCTGGGCGTCACGCAAAACACGCTCCCACACCCTCATCGGGTAGCGGGACGCGGCATGT  
GGTCCCCCGTAGCGCAAGCTGCGGTGGGCCGAAGATATGGCTGCCGGCGTATCGTGCCGG  
ACACAGCGCGTGGTGGGCGACCTCGCTTTACTTACCGCAGTGCATCCGGGGCGTAGCCGA  
CGTGATGGCCTCTAAGGACCCTTTGAACGGTGCACGACG

>ITS.M647\_C5F

GGAAGTAAAAGTTCGTAACAAGGTTTCCGTAGGTGAACCTGCGGAAGGATCATTGTTCGTGA  
CCCTGACCAAATAGACCGTGCACGCGTCATCCAGCCTGCCGGCGGGCACCCTTCGTG  
GCTCGGCCAAGTCTCGACAACCTCCTCTCCTCGGAGTGGGGGCTCGGGTAAAAGAACC  
CACGACGCCTAAGGCGTCAAGGAACACTGTGCCTAGCCCGGGGACGCGGACGGCTTGCTG  
GCCGCCCCCGTGCTGCAATGCTATTTAATCCACACGACTCTCGGCAACGGATATCTCGG  
CTCTCGCATCGATGAAGAACGTAGCGAAATGCGATACCTGGTGTGAATTGCAGAATCCCG  
CGAACCATCGAGTCTTTGAACGCAAGTTGCGCCCCGAGGCCATTCGGCTGAGGGCACGCCT  
GCCTGGGCGTCACGCAAAACACGCTCCCACACCCTCATCGGGTAGCGGGACGCGGCATGT  
GGTCCCCGTAGCGCAAGCTGCGGTGGGCCGAAGATATGGCTGCCGGCGTATCGTGCCGG  
ACGACAGCGCGTGGTGGGCAACCTCGCTTTACTTACCGCGGTGCATCTGGGGCGTAGCCGA  
CGTGATGGCCTCTAAGGACCCTATGAACGGTGCACGACG



>ITS.M647\_C6F

GGAAGTAAAAGTCGTAACAAGGTTTCCGTAGGTGAACCTGCGGAAGGATCATTGTTCGTGA  
CCCTGACCAAATAGACCGTGCACGCGTCATCCAGCCTGCCGGCGGCGGCACCGTTTCGTC  
GCTCGGCCAAGTCCTCGACAACCTCCTCTCCTCGGAGTGGGGGCTCGGGGTAAAAGAACC  
CACGACGCCTAAGGCGTCAAGGAACACTGTGCCTAGCCCGGGGACGCGGACGGCTTGCTG  
GCCGCCCCCGTGCTGCAATGCTATTTAATCCACACGACTCTCGGCAACGGATATCCCGG  
CTCTCGCATCGATGAAGAACGTAGCGAAATGCGATACCTGGTGTGAATTGCAGAATCCCG  
CGAACCATCGAGTCTTTGAACGCAAGTTGCGCCCCGAGGCCATTCGGCTGAGGGCACGCCT  
GCCTGGGCGTACGCAAAAACAGCTCCCACACCCTCATCGGGTAGCGGGACGCGGCATGT  
GGTCCCCCGTAGCGCAAGCTGCGGTGGGCCGAAGATATGGCTGCCGGCGTATCGTGCCGG  
ACACAGCGCGTGGTGGGCGACCTCGCTTTACTTACCGCAGTGCATCCGGGGCGTAGCCGA  
CGTGATGGCCTCTAAGGACCCTTTGAACGGTGCACACGACG

>ITS.M647\_C7F

GGAAGTAAAAGTCGTAACAAGGTTTCCGTAGGTGAACCTGCGGAAGGATCATTGTTCGTGA  
CCCTGACCAAATAGACCGTGCACGCGTCATCCAGCCTGCCGGCGGCGGCACCGTTTCGTC  
GCTCGGCCAAGTCCTCGACAACCTCCTCTCCTCGGAGTGGGGGCTCGGGGTAAAAGAACC  
CACGACGCCTAAGGCGTCAAGGAACACTGTGCCTAGCCCGGGGACGCGGACGGCTTGCTG  
GCCGCCCCCGTGCTGCAATGCTATTTAATCCACACGACTCTCGGCAACGGATATCTCGG  
CTCTCGCATCGATGAAGAACGTAGCGAAATGCGATACCTGGTGTGAATTGCAGAATCCCG  
CGAACCATCGAGTCTTTGAACGCAAGTTGCGCCCCGAGGCCATTCGGCTGAGGGCACGCCT  
GCCTGGGCGTACGCAAAAACAGCTCCCACACCCTCATCGGGTAGCGGGACGCGGCATGT  
GGTCCCCCGTAGCGCAAGCTGCGGTGGGCCGAAGATATGGCTGCCGGCGTATCGTGCCGG  
ACACAGCGCGTGGTGGGCGACCTCGCTTTACTTACCGCAGTGCATCCGGGGCGTAGCCGA  
CGTGATGGCCTCTAAGGACCCTTTGAACGGTGCACACGACG

>ITS.M647\_C8F

GGAAGTAAAAGTCGTAACAAGGTTTCCGTAGGTGAACCTGCGGAAGGATCATTGTTCGTGA  
CCCTGACCAAATAGACCGTGCACGCGTCATCCAGCCTGCCGGCGGCGGCACCGTTTCGTC  
GCTCGGCCAAGTCCTCGACAACCTCCTCTCCTCGGAGTGGGGGCTCGGGGTAAAAGAACC  
CACGACGCCTAAGGCGTCAAGGAACACTGTGCCTAGCCCGGGGACGCGGACGGCTTGCTG  
GCCGCCCCCGTGCTGCAATGCTATTTAATCCACACGACTCTCGGCAACGGATATCTCGG  
CTCTCGCATCGATGAAGAACGTAGCGAAATGCGATACCTGGTGTGAATTGCAGAATCCCG  
CGAACCATCGAGTCTTTGAACGCAAGTTGCGCCCCGAGGCCATTCGGCTGAGGGCACGCCT  
GCCTGGGCGTACGCAAAAACAGCTCCCACACCCTCATCGGGTAGCGGGACGCGGCATGT  
GGTCCCCCGTAGCGCAAGCTGCGGTGGGCCGAAGATATGGCTGCCGGCGTATCGTGCCGG  
ACACAGCGCGTGGTGGGCGACCTCGCTTTACTTACCGCAGTGCATCCGGGGCGTAGCCGA  
CGTGATGGCCTCTAAGGACCCTTTGAACGGTGCACACGACG

>ITS.M820\_C1R

GGAAGTAAAAGTCGTAACAAGGTTTCCGTAGGTGAACCTGCGGAAGGATCATTGTTCGTGA  
CCCTGACCAAATAGACCGTGCACGCGTCATCCAGCCTGCCGGCGGCGGCACCGTTTCGTC  
GCTCGGCCAAGTCCTCGACAACCTCCTCTCCTCGGAGTGGGGGCTCGGGGTAAAAGAACC  
CACGACGCCTAAGGCGTCAAGGAACACTGTGCCTAGCCCGGGGACGCGGACGGCTTGCTG  
GCCGCCCCCGTGCTGCAATGCTATTTAATCCACACGACTCTCGGCAACGGATATCTCGG  
CTCTCGCATCGATGAAGAACGTAGCGAAATGCGATACCTGGTGTGAATTGCAGAATCCCG  
CGAACCATCGAGTCTTTGAACGCAAGTTGCGCCCCGAGGCCATTCGGCTGAGGGCACGCCT  
GCCTGGGCGTACGCAAAAACAGCTCCCACACCCTCATCGGGTAGCGGGACGCGGCATGT  
GGTCCCCCGTAGCGCAAGCTGCGGTGGGCCGAAGATATGGCTGCCGGCGTATCGTGCCGG  
ACACAGCGCGTGGTGGGCGACCTCGCTTTACTTACCGCAGTGCATCCGGGGCGTAGCCGA  
CGTGATGGCCTCTAAGGACCCTTTGAACGGTGCACACGACG

>ITS.M820\_C2R

GGAAGTAAAAGTCGTAACAAGGTTTCCGTAGGTGAACCTGCGGAAGGATCATTGTTCGTGA  
CCCTGACCAAATAGACCGTGCACGCGTCATCCAGCCTGCCGGTGGCGGCACCGTTTCGTC  
GCTCGGCCAAGTCCTCGACAACCTCCACTCCTCGGAGTGGGGGCTCGGGGTAAAAGAACC  
CACGACGCCTAAGGCGTCAAGGAACACTGTGCCTAGCCCGGGGACGCGGACGGCTTGCTG  
CCCccccccCGTGCTGCAATGCTATTTAATCCACACGACTCTCGGCAACGGATATCTCGG

CTCTCGCATCGATGAAGAACGTAGCGAAATGCGATACCTGGTGTGAATTGCAGAATCCCG  
CGAACCATCGAGTCTTTGAACGCAAGTTGCGCCCCGAGGCCATTCGGCTGAGGGCACGCCT  
GCCTGGGCGTCACGCAAAAACACGCTCCCACACCCTCATCGGGTAGCGGGACGCGGCATGT  
GGTCCCCCGTAGCGCAAGCTGCGGTGGGCCGAAGATATGGCTGCCGGCGTATCGTGCCGG  
ACACAGCGCGTGGTGGGCGACCTCGCTTTACTTACCGCAGTGCATCCGGGGCGTAGCCGA  
CGTGATGGCCTCTAAGGACCCTTTGAACGGTGCACACGACG

>ITS.M820\_C3F

GGAAGTAAAAGTTCGTAACAAGGTTTCCGTAGGTGAACCTGCGGAAGGATCATTGTTCGTGA  
CCCTGACCAAAATAGACCGTGCACGCGTCATCCAGCCTGCCGGCGGGCACCCTTCGTG  
GCTCGGCCAAGTCTTCGACAACCTCCTCTCCTCGGAGTGGGGGCTCGGGGTAAGAACC  
CACGACGCCTAAGGCGTCAAGGAACACTGTGCCTAGCCGGGGACGCGGACGGCTTGCTG  
CCCGCCCCCGTGCTGCAATGCTATTTAATCCACACGACTCTCGGCAACGGATATCTCGG  
CTCTCGCATCGATGAAGAACGTAGCGAAATGCGATACCTGGTGTGAATTGCAGAATCCCG  
CGAACCATCGAGTCTTTGAACGCAAGTTGCGCCCCGAGGCCATTCGGCTGAGGGCACGCCT  
GCCTGGGCGTCACGCAAAAACACGCTCCTACACCCTCATCGGGTAGCGGGACGCGGCATGT  
GGTCCCCCGTAGCGCAAGCTGCGGTGGGCCGAAGATATGGCTGCCGGCGTATCGTGCCGG  
ACACAGCGCGTGGTGGGCGACCTCGCTTTACTTACCGCAGTGCATCCGGGGCGTAGCCGA  
CGTGATGGCCTCTAAGGACCCTATGAACGGTGCACACGACG

>ITS.M820\_C4F

GGAAGTAAAAGTTCGTAACAAGGTTTCCGTAGGTGAACCTGCGGAAGGATCATTGTTCGTGA  
CCCTGACCAAAATAGACCGTGCACGCGTCATCCACCCTGCCGGCGGGCACCCTTCGTG  
GCTCGGCCAAGTCTTCGACAACCTCCTCTCCTCGGAGTGGGGGCTCGGGGTAAGAACC  
CACGACGCCTAAGGCGTCAAGGAACACTGTGCCTAGCCGGGGACGCGGACGGCTTGCTG  
GCCGCCCCCGTGCTGCAATGCTATTTAATCCACACGACTCTCGGCAACGGATATCTCGG  
CTCTCGCATCGATGAAGAACGTAGCGAAATGCGATACCTGGTGTGAATTGCAGAATCCCG  
CGAACCATCGAGTCTTTGAACGCAAGTTGCGCCCCGAGGCCATTCGGCTGAGGGCACGCCT  
GCCTGGGCGTCACGCAAAAACACGCTCCCACACCCTCATCGGGTAGCGGGACGCGGCATGT  
GGTCCCCCGTAGCGCAAGCTGCGGTGGGCCGAAGATATGGCTGCCGGCGTATCGTGCCGG  
ACACAGCGCGTGGTGGGCGACCTCGCTTTACTTACCGCAGTGCATCCGGGGCGTAGCCGA  
CGTGATGGCCTCTAAGGACCCTATGAACGGTGCACACGANN

>ITS.M820\_C5Frc\_rev

GGAAGTAAAAGTTCGTAACAAGGTTTCCGTAGGTGAACCTGCGGAAGGATCATTGTTCGTGA  
CCCTGACCAAAATAGACCGTGCACGCGTCATCCAGCCTGCCGGCGGGCACCCTTCGTG  
GCTCGGCCAAGTCTTCGACAACCTCCTCTCCTCGGAGTGGGGGCTCGGGGTAAGAACC  
CACGACGCCTAAGGCGTCAAGGAACACTGTGCCTAGCCGGGGACGCGGACGGCTTGCTG  
CCCGCCCCCGTGCTGCAATGCTATTTAATCCACACGACTCTCGGCAACGGATATCTCGG  
CTCTCGCATCGATGAAGAACGTAGCGAAATGCGATACCTGGTGTGAATTGCAGAATCCCG  
CGAACCATCGAGTCTTTGAACGCAAGTTGCGCCCCGAGGCCATTCGGCTGAGGGCACGCCT  
GCCTGGGCGTCACGCAAAAACACGCTCCCACACCCTCATCGGGTAGCGGGACGCGGCATGT  
GGTCCCCCGTAGCGCAAGCTGCGGTGGGCCGAAGATATGGCTGCCGGCGTATCGTGCCGG  
ACACAGCGCGTGGTGGGCGACCTCGCTTTACTTACCGCAGTGCATCCGGGGCGTAGCCGA  
CGTGATGGCCTCTAAGGACCCTTTGAACGGTGCACACGACG

>ITS.M820\_C6Frc\_rev

GGAAGTAAAAGTTCGTAACAAGGTTTCCGTAGGTGAACCTGCGGAAGGATCATTGTTCGTGA  
CCCTGACCAAAATAGACCGTGCACGCGTCATCCAGCCTGCCGGCGGGCACCCTTCGTG  
GCTCGGCCAAGTCTTCGACAACCTCCTCTCCACGAGTGGGGGCTCGGGGTAAGAACC  
CACGACGCCTAAGGCGTCAAGGAACACTGTGCCTAGCCGGGGACGCGGACGGCTTGCTG  
GCCGCCCCCGTGCTGCAATGCTATTTAATCCACACGACTCTCGGCAACGGATATCTCGG  
CTCTCGCATCGATGAAGAACGTAGCGAAATGCGATACCTGGTGTGAATTGCAGAATCCCG  
CGAACCATCGAGTCTTTGAACGCAAGTTGCGCCCCGAGGCCATTCGGCTGAGGGCACGCCT  
GCCTGGGCGTCACGCAAAAACACGCTCCCACACCCTCATCGGGTAGCGGGACGCGGCATGT  
GGTCCCCCGTAGCGCAAGCTGCGGTGGGCCGAAGATATGGCTGCCGGCGTATCGTGCCGG  
ACACAGCGCGTGGTGGGCGACCTCGCTTTACTTACCGCAGTGCATCCGGGGCGTAGCCGA  
CGTGATGGCCTCTAAGGACCCTATGAACGGTGCACACGACG

>ITS.M820\_C7Frc\_rev  
GGAAGTAAAAGTCGTAAACAAGGTTTCCGTAGGTGAACCTGCGGAAGGATCATTGTTCGTGA  
CCCTGACCAAATAGACCGTGCACGCGTCATCCACCCTGCCGGCGGCGGCACCGTTTCGTG  
GCTCGGCCAAGTCCTCGACAACCTCCTCTCCTCGGAGTGGGGGCTCGGGGTAAAAGAACC  
CACGACGCCTAAGGCGTCAAGGAACACTGTGCCTAGCCCGGGGACGCGGACGGCTTGCTG  
GCCGCCCCCGTGCTGCAATGCTATTTAATCCACACGACTCTCGGCAACGGATATCTCGG  
CTCTCGCATCGATGAAGAACGTAGCGAAATGCGATACCTGGTGTGAATTGCAGAATCCCG  
CGAACCATCGAGTCTTTGAACGCAAGTTGCGCCCCGAGGCCATTCGGCTGAGGGCACGCCT  
GCCTGGGCGTCACGCAAAACACGCTCCCACACCCTCATCGGGTAGCGGGACGCGGCATGT  
GGTCCCCCGTAGCGCAAGCTGCGGTGGGCCGAAGATATGGCTGCCGGCGTATCGTGCCGG  
ACACAGCGCGTGGTGGGCGACCTCGCTTTACTTACCGCAGTGCATCCGGGGCGTAGCCGA  
CGTGATGGCCTCTAAGGACCCTTTGAACGGTGCACACGACG

>ITS.M820\_C9F  
GGAAGTAAAAGTCGTAAACAAGGTTTCCGTAGGTGAACCTGCGGAAGGATCATTGTTCGTGA  
CCCTGACCAAATAGACCGTGCACGCGTCATCCAGCCTGCCGGCGGCGGCACCGTTTCGTG  
GCTCGGCCAAGTCCTCGACAACCTCCTCTCCTCGGAGTGGGGGCTCGGGGTAAAAGAACC  
CACGACGCCTAAGGCGTCAAGGAACACTGTGCCTAGCCCGGGGACGCGGACGGCTTGCTG  
GCCGCCCCCGTGCTGCAATGCTATTTAATCCACACGACTCTCGGCAACGGATATCTCGG  
CTCTCGCATCGATGAAGAACGTAGCGAAATGCGATACCTGGTGTGAATTGCAGAATCCCG  
CGAACCATCGAGTCTTTGAACGCAAGTTGCGCCCCGAGGCCATTCGGCTGAGGGCACGCCT  
GCCTGGGCGTCACGCAAAACACGCTCCCACACCCTCATCGGGTAGCGGGACGCGGCATGT  
GGTCCCCCGTAGCGCAAGCTGCGGTGGGCCGAAGATATGGCTGCCGGCGTATCGTGCCGG  
ACACAGCGCGTGGTGGGCGACCTCGCTTTACTTACCGCAGTGCATCCGGGGCGTAGCCGA  
CGTGATGGCCTCTAAGGACCCTATGAACGGTGCACACGACG

>ITS.M06084\_C1R  
GGAAGTAAAAGTCGTAAACAAGGTTTCCGTAGGTGAACCTGCGGAAGGATCATTGTTCGTGA  
CCCTGACCAAATAGACCGTGCACGCGTCATCCAGCCC GCCGGCGGCGGCACCGTTTCGTG  
GCTCGGCCAAGTCCTCGACAACCTCCTCTCCTCGGAGTGGGGGCTCGGGGTAAAAGAACC  
CACGACGCCTAAGGCGTCAAGGAACACTGTGCCTAGCCCGGGGACGCGTACGGCTTGCTG  
GCCGCCCCCGTGCTGCAATGCTATTTAATCCACACGACTCTCGGCAACGGATATCTCGG  
CTCTCGCATCGATGAAGAACGTAGCGAAATGCGATACCTGGTGTGAATTGCAGAATCCCG  
CGAACCATCGAGTCTTTGAACGCAAGTTGCGCCCCGAGGCCATTCGGCTGAGGGCACGCCT  
GCCTGGGCGTCACGCAAAACACGCTCCCACCCCCTCATCGGGTAGCGGGACGCGGCATGT  
GGCCCCCGTAGCGCAAGCTGCGGTGGGCCGAAGATATGGCTGCCGGCGTATCGTGCCGG  
ACACAGCGCGTGGTGGGCGACCTCGCTTTACTTACCGCAGTGCATCCGGGGCGTAGCCGA  
CGTGATGGCCTCCAAGGACCCTATGAACGGTGCACACGACG

>ITS.M06084\_C2R  
GGAAGTAAAAGTCGTAAACAAGGTTTCCGTAGGTGAACCTGCGGAAGGATCATTGTTCGTGA  
CCCTGACCAAATAGACCGCGCACGCGTAATCCAGCCTGCCGGCGATGGCACCGTCCGTG  
GCTCGGCCAAGTCCTCGACAACCTCATCTCCTCGGAGTGGGGGCTCGGGGTAAAAGAACC  
ACGACGCCTAAGGCGTCAAGGAACACTGTGCCTAGCCCGGGGACGCGGACGGCTTGCTGG  
CCGCCCCCGTGCTGCAATGCTATTTAATCCACACGACTCTCGGCAACGGATATCTCGGC  
TCTCGCATCGATGAAGAACGTAGCGAAATGCGATACCTGGTGTGAATTGCAGAATCCCGC  
GAACCATCGAGTCTTTGAACGCAAGTTGCGCCCCGAGGCCATTCGGCTGAGGGCACGCCTG  
CCTGGGCGTCACGCAAAACACGCTCCCACCCCCTCATCGGGTAGCGGGACGCGGCATGTG  
GCCCCCGTAGCGCAAGCTGCGGTGGGCCGAAGATATGGCTGCCGGCGTGTCTGTGCCGG  
CACAGCGCGTGGTGGGCGACCTCGCTTTACTTACCGCAGTGCATCCGGGGCGTAGCCGAC  
GTGATGGCCTCCAAGGACCCTATGAACGGTGCACACGACG

>ITS.M06084\_C3R  
GGAAGTAAAAGTCGTAAACAAGGTTTCCGTAGGTGAACCTGCGGAAGGATCATTGTTCGTGA  
CCCTGACCAAATAGACCGTGCACGCGTCATCCAGCCTGCCGGCGGCGCCACCGTTTCGTG  
GCTCGGCCAAGTCCTCGACAACCTCCTCTCCTCGGAGTGGGGGCTCGGGGTAAAAGAACC  
CACGACGCCTAAGGCGTCAAGGAACACTGTGCCTAGCCCGGGGACGCGGACGGCTTGCTG  
GCCGCCCCCGATGCTGCAATGCTATTTAATCCACACGACTCTCGGCAACGGATATCTCGG

CTCTCGCATCGATGAAGAACGTAGCGAAATGCGATACCTGGTGTGAATTGCAGAATCCCG  
CGAACCATCGAGTCTTTGAACGCAAGTTGCGCCCGAAGCCATTCGGCTGAGGGCACGCCT  
GCCTGGGCGTCACGCAAAACACGCTCGCACACCCTCATCGGGTAGCGGGACGCGGCATGT  
GGTCCCCCGTAGCGCAAGCTGCGGTGGGCCGAAGATATGGCTGCCGGCGTATCGTGCCGG  
ACACAGCGCATGGTGGGCGACCTCACTTTACTTACCGCAGTGCATCCGGGGCAAAGCCGA  
CGTGATGGCCTCTAAGGACCCTATGAACGGTGCACGACG

>ITS.M06084\_C4Frc\_rev

GGAAGTAAAAGTCGTAAACAAGGTTTCCGTAGGTGAACCTGCGGAAGGATCATTGTCTGTGA  
CCCTGACCAAATAGACCGCGCACGCGTAATCCAGCCTGCCGGCGATGGCACCGTCCGTC  
GCTCGGCCAAGTCTCGACAACCTCATCTCCTCGGAGTGGGGCTCGGGGTAAAAGAACC  
ACGACGCCTAAGGCGTCAAGGAACACTGTGCCTAGCCCGGGGACGCGTACGGCTTGCTGG  
CCGCCCCCGTGCTGCAATGCTATTTAATCCACACGACTCTCGGCAACGGATATCTCGGC  
TCTCGCATCGATGAAGAACGTAGCGAAATGCGATACCTGGTGTGAATTGCAGAATCCCGC  
GAACCATCGAGTCTTTGAACGCAAGTTGCGCCCGAGGCCATTCGGCTGAGGGCACGCCTG  
CCTGGGCGTCACGCAAAACACGCTCCCACCCCTCATCGGGTAGCGGGACGCGGCATGTG  
GCCCCCGTAGCGCAAGCTGCGGTGGGCCGAAGATATGGTTGCCGGCGTATCGTGCCGGA  
CACAGCGCGTGGTGGGCGACCTCGCTTTACTTACCGCAGTGCATCCGGGGCGTAGCCGAC  
GTGATGGCCTCTAAGGACCCTATGAACGGTGCACGACG

>ITS.M06084\_C5Frc\_rev

GGAAGTAAAAGTCGTAAACAAGGTTTCCGTAGGTGAACCTGCGGAAGGATCATTGTCTGTGA  
CCCTGACCAAATAGACCGTGCACACGTCATCCAGCCTGCCGGCGGGCGGCACCGTTTCGTC  
GCTCGGCCAAGTCTCGACAACCTCCTCTCCTCGGAGTGGGGGCTCGGGGTAAAAGAACC  
CACGACGCCTAAGGCGTCAAGGAACACTGTGCCTAGCCCGGGGACGCGGACGGCTTGCTG  
GCCGCCCCCGTGCTGCAATGCTATTTAATCCACACGACTCTCGGCAACGGATATCTCGG  
CTCTCGCATCGATGAAGAACGTAGCGAAATGCGATACCTGGTGTGAATTGCAGAATCCCG  
CGAACCATCGAGTCTTTGAACGCAAGTTGCGCCCGAGGCCATTCGGCTGAGGGCACGCCT  
GCCTGGGCGTCACGCAAAACACGCTCCCACACCCTCATCGGGTAGCGGGACGCGGCATGT  
GGTCCCCCGTAGCGCAAGCTGCGGTGGGCCGAAGATATGGCTGCCGGCGTATCGTGCCGG  
ACACAGCGCGTGGTGGGCGACCTCGCTTTACTTACCGCAGTGCATCCGGGGCGTAGCCGA  
CGTGATGGCCTCTAAGGACCCTATGAACGGTGCACGACG

>ITS.M06084\_C7F

GGAAGTAAAAGTCGTAAACAAGGTTTCCGTAGGTGAACCTGCGGAAGGATCATTGTCTGTGA  
CCCTGACCAAATAGACCGTGCACGCGTCATCCAGCCTGCCGGCGGGCGGCACCGTTTCGTC  
GCTCGGCCAAGTCTCGACAACCTCCTCTCCTCGGAGTGGGGGCTCGGGGTAAAAGAACC  
CACGACGCCTAAGGCGTCAAGGAACACTGTGCCTAGCCCGGGGACGCGGACGGCTTGCTG  
GCCGCCCCCGTGCTGCAATGCTATTTAATCCACACGACTCTCGGCAACGGATATCTCGG  
CTCTCGCATCGATGAAGAACGTAGCGAAATGCGATACCTGGTGTGAATTGCAGAATCCCG  
CGAACCATCGAGTCTTTGAACGCAAGTTGCGCCCGAGGCCATTCGGCTGAGGGCACGCCT  
GCCTGGGCGTCACGCAAAACACGCTCCCACACCCTCATCGGGTAGCGGGACGCGGCATGT  
GGTCCCCCGTAGCGCAAGCTGCGGTGGGCCGAAGATATGGCTGCCGGCGTATCGTGCCGG  
ACACAGCGCGTGGTGGGCGACCTCGCTTTACTTACCGCAGTGCATCCGGGGCGTAGCCGA  
CGTGATGGCCTCTAAGGACCCTATGAACGGTGCACGACG

>ITS.M06084\_C8F

GGAAGTAAAAGTCGTAAACAAGGTTTCCGTAGGTGAACCTGCGGAAGGATCATTGTCTGTGA  
CCCTGACCAAATAGACCGTGCACGCGTCATCCAGCCCGCGGGCGGGCACCGTTTCGCC  
GCTCGGCCAAGTCTCGACAACCTCCTCTCCTCGGAGTGGGGGCCCCGGGTAAAAGAACC  
CACGACGCCTAAGGCGTCAAGGAACACTGTGCCTAGCTCGGGGACGCGGACGGCTTGCTG  
GCCGCCCCCTCGTGCTGCAATGCTATTTAATCCACACGACTCTCGGCAACGGATATCTCGG  
CTCTCGCATCGATGAAGAACGTAGCGAAATGCGATACCTGGTGTGAATTGCAGAATCCCG  
CGAACCATCGAGTCTTTGAACGCAAGTTGCGCCCGAGGCCATTCGGCTGAGGGCACGCCT  
GCCTGGGCGTCACGCAAAACACGCTCCCACCCCTCATCTGGTAGCGGGACGCGGCATGT  
GGCCCCCGTAGCGCAAGCTGCGGTGGGCCGAAGATATGGCTGCCGGCGTATCGTGCCGG  
ACACAGCGCGTGGTGGGCGACCTCGCTTTACTTACCGCAGTGCATCCGGGGCGTAGCCGA  
CGTGATGGCCTCCAAGGACCCTATGAACGGTGCACGACG

>ITS.M06084\_C9Frc\_rev

GGAAGTAAAAGTCGTAAACAAGGTTTCCGTAGGTGAACCTGCGGAAGGATCATTGTTCGTGA  
CCCTGACCAAATAGACCGTGCACGCGTCATCCAGCCTGCCGGCGGCGGCACCGTTTCGTG  
GCTCGGCCAAGTCCTCGACAACCTCCTCCTCGGAGTGGGGGCTCGGGGTAAAAGAACC  
CACGACGCCTAAGGCGTCAAGGAACACTGTGCCTAGCCCGGGGACGCGGACGGCTTGCTG  
GCCGCCCCCGTGTGCAATGCTATTTAATCCACACGACTCTCGGCAACGGATATCTCGG  
CTCTCGCATCGATGAAGAACGTAGCGAAATGCGATACCTGGTGTGAATTGCAGAATCCCG  
CGAACCATCGAGTCTTTGAACGCAAGTTGCGCCCCGAGGCCATTTCGGCTGAGGGCACGCCT  
GCCTGGGCGTCACGCAAAACACGCTCCCACACCCTCATCGGGTAGCGGGACGCGGCATGT  
GGTCCCCCGTAGCGCAAGCTGCGGTGGGCCGAAGATATGGCTGCCGGCGTATCGTGCCGG  
ACACAGCGCGTGGTGGGCGACCTCGCTTTACTTACCGCAGTGCATCCGGGGCGTAGCCGA  
CGTGATGGCCTCTAAGGACCCTTTGAACGGTGCACGACG

>ITS.M06102\_C1R

GGAAGTAAAAGTCGTAAACAAGGTTTCCGTAGGTGAACCTGCGGAAGGATCATTGTTCGTGA  
CCCTGACCAAATAGACCGCGCACGCGTAATCCAGCCTGCCGGCGATGGCACCGTCCGTG  
GCTCGGCCAAGTCCTCGACAACCTCATCTCCTCGGAGTGGGGCTCGGGGTAAAAGAACC  
ACGACGCCTAAGGCGTCAAGGAACACTGTGCCTAGCCCGGGGACGCGTACGGCTTGCTGG  
CCGCCCCCGTGTGCAATGCTATTTAATCCACACGACTCTCGGCAACGGATATCTCGGC  
TCTCGCATCGATGAAGAACGTAGCGAAATGCGATACCTGGTGTGAATTGCAGAATCCCGC  
GAACCATCGAGTCTTTGAACGCAAGTTGCGCCCCGAGGCCATTTCGGCTGAGGGCACGCCTG  
CCTGGGCGTCACGCAAAACACGCTCCCACCCCCTCATCGGGTAGCGGGACGCGGCATGTG  
GCCCCCGTAGCGCAAGCTGCGGTGGGCCGAAGATATGGCTGCCGGCGTATCGTGCCGGA  
CACAGCGCGTGGTGGAGCGACCTCGCTTTACTTACCGTAGTGCATCCGGGGCGTAGCCGAC  
GTGATGGCCTCCAAGGACCCTTTGAACGGTGCACGACG

>ITS.M06102\_C2R

GGAAGTAAAAGTCGTAAACAAGGTTTCCGTAGGTGAACCTGCGGAAGGATCATTGTTCGTGA  
CCCTGACCAAATAGACCGCGCACGCGTAATCCAGCCTGCCGGCGATGGCACCGTCCGTG  
GCTCGGCCAAGTCCTCGACAACCTCATCTCCTCGGAGTGGGGCTCGGGGTAAAAGAACC  
ACGACGCCTAAGGCGTCAAGGAACACTGTGCCTAGCCCGGGGACGCGTACGGCTTGCTGG  
CCGCCCCCGTGTGCAATGCTATTTAATCCACACGACTCTCGGCAACGGATATCTCGGC  
TCTCGCATCGATGAAGAACGTAGCGAAATGCGATACCTGGTGTGAATTGCAGAATCCCGC  
GAACCATCGAGTCTTTGAACGCAAGTTGCGCCCCGAGGCCATTTCGGCTGAGGGCACGCCTG  
CCTGGGCGTCACGCAAAACACGCTCCCACCCCCTCATCGGGTAGCGGGACGCGGCATGTG  
GCCCCCGTAGCGCAAGCTGCGGTGGGCCGAAGATATGGCTGCCGGCGTATCGTGCCGGA  
CACAGCGCGTGGTGGAGCGACCTCGCTTTACTTACCGTAGTGCATCCGGGGCGTAGCCGAC  
GTGATGGCCTCCAAGGACCCTTTGAACGGTGCACGACG

>ITS.M06102\_C3F

GGAAGTAAAAGTCGTAAACAAGGTTTCCGTAGGTGAACCTGCGGAAGGATCATTGTTCGTGA  
CCCTGACCAAATAGACCGCGCACGCGTAATCCAGCCTGCCGGCGATGGCACCGTCCGTG  
GCTCGGCCAAGTCCTCGACAACCTCATCTCCTCGGAGTGGGGCTCGGGGTAAAAGAACC  
ACGACGCCTAAGGCGTCAAGGAACACTGTGCCTAGCCCGGGGACGCGGACGGCTTGCTGG  
CCGCCCCCGTGTGCAATGCTATTTAATCCACACGACTCTCGGCAACGGATATCTCGGC  
TCTCGCATCGATGAAGAACGTAGCGAAATGCGATACCTGGTGTGAATTGCAGAATCCCGC  
GAACCATCGAGTCTTTGAACGCAAGTTGCGCCCCGAGGCCATTTCGGCTGAGGGCACGCCTG  
CCTGGGCGTCACGCAAAACACGCTCCCACCCCCTCATCGGGTAGCGGGACGCGGCATGTG  
GCCCCCGTAGCGCAAGCTGCGGTGGGCCGAAGATATGGCTGCCGGCGTATCGTGCCGGA  
CACAGCGCGTGGTGGAGCGACCTCGCTTTACTTACCGCAGTGCATCCGGGGCGTAGCCGAC  
GTGATGGCCTCCAAGGACCCTATGAACGGTGCACGACG

>ITS.M06102\_C4F

GGAAGTAAAAGTCGTAAACAAGGTTTCCGTAGGTGAACCTGCGGAAGGATCATTGTTCGTGA  
CCCTGACCAAATAGACCGCGCACGCGTAATCCAGCCTGCCGGCGATGGTACCGTCCGTG  
GCTCGGCCAAGTCCTCGACAACCTCATCTCCTCGGAGTGGGGCTCGGGGTAAAAGAACC  
ACGACGCCTAAGGCGTCAAGGAACACTGTGCCTAGCCCGGGGACGCGGACGGCTTGCTGG  
CCGCCCCCGTGTGCAATGCTATTTAATCCACACGACTCTCGGCAACGGATATCTCGGC  
TCTCGCATCGATGAAGAACGTAGCGAAATGCGATACCTGGTGTGAATTGCAGAATCCCGC  
GAACCATCGAGTCTTTGAACGCAAGTTGCGCCCCGAGGCCATTTCGGCTGAGGGCACGCCTG  
CCTGGGCGTCACGCAAAACACGCTCCCACCCCCTCATCGGGTAGCGGGACGCGGCATGTG  
GCCCCCGTAGCGCAAGCTGCGGTGGGCCGAAGATATGGCTGCCGGCGTATCGTGCCGGA  
CACAGCGCGTGGTGGAGCGACCTCGCTTTACTTACCGCAGTGCATCCGGGGCGTAGCCGAC  
GTGATGGCCTCCAAGGACCCTATGAACGGTGCACGACG

TCTCGCATCGATGAAGAACGTAGCGAAATGCGATACCTGGTGTGAATTGCAGAATCCCGC  
GAACCATCGAGTCTTTGAACGCAAGTTGCGCCCGAGGCCATTTCGGCTGAGGGCACGCCTG  
CCTGGGCGTCACGCAAAACACGCTCCCACCCCCTCATCGGGTAGCGGGACGCGGCATGTG  
GCCCCCGTAGCGCAAGCTGCGGTGGGCCGAAGATATGGCTGCCGGCGTATCGTGCCGGA  
CACAGAGCGTGGTGTAGCGACCTCGCTTTACTTACCGTAGTGCATCCGGGGCGTAGCCGAC  
GTGATGGCCTCTAAGGACCCTATGAACGGTGCACGACG

>ITS.M06102\_C5Frc\_rev

GGAAGTAAAAGTCGTAAACAAGGTTTCCGTAGGTGAACCTGCGGAAGGATCATTGTTCGTGA  
CCCTGACCAAATAGACCGCGCACGCGTAATCCAGCCTGCCGGCGACGGCACCGTCCGTC  
GCTCGGCCAAGTCTTCGACAACCTCATCTCCTCGGAGTGGGGCTCGGGGTAAAAGAACC  
ACGACGCCTAAGGCGTCAAGGAACACTGTGCCTAGCCCGGGGACGCGGACGGCTTGCTGG  
CCGCCCCCGTGCTGCAATGCTATTTAATCCACACGACTCTCGGCAACGGATATCTCGGC  
TCTCGCATCGATGAAGAACGTAGCGAAATGCGATACCTGGTGTGAATTGCAGAATCCCGC  
GAACCATCGAGTCTTTGAACGCAAGTTGCGCCCGAGGCCATTTCGGCTGAGGGCACGCCTG  
CCTGGGCGTCACGCAAAACACGCTCCCACCCCCTCATCGGGTAGCGGGACGCGGCATGTG  
GCCCCCGTAGCGCAAGCTGCGGTGGGCCGAAGATATGGCTGCCGGCGTATCGTGCCGGA  
CACAGCGCGTGGTGTAGCGACCTCGCTTTACTTACCGCAGTGCATCCGGGGCGTAGCCGAC  
GTGATGGCCTCTAAGGACCCTATGAACGGTGCACGACG

>ITS.M06102\_C6F

GGAAGTAAAAGTCGTAAACAAGGTTTCCGTAGGTGAACCTGCGGAAGGATCATTGTTCGTGA  
CCCTGACCAAATAGACCGCGCACGCGTAATCCAGCCTGCCGGCGATGGCACCGTTTCGTC  
GCTCGGCCAAGTCTTCGACAACCTCATCTCCTCGGAGTGGGGCTCGGGGTAAAAGAACC  
ACGACGCCTAAGGCGTCAAGGAACACTGTGCCTAGCCCGGGGACGCGGACGGCTTGCTGG  
CCGCCCCCGTGCTGCAATGCTATTTAATCCACACGACTCTCGGCAACGGATATCTCGGC  
CTCGCATCGATGAAGAACGTAGCGAAATGCGATACCTGGTGTGAATTGCAGAATCCCGC  
AACCATCGAGTCTTTGAACGCAAGTTGCGCCCGAGGCCATTTCGGCTGAGGGCACGCCTGC  
CTGGGCGTCACGCAAAACACGCTCCCACCCCCTCATCGGGTAGCGGGACGCGGCATGTGG  
CCCCCGTAGCGCAAGCTGCGGTGGGCCGAAGATATGGCTGCCGGCGTATCGTGCCGGAC  
ACAGCGCGTGGTGTAGCGACCTCGCTTTACTTACCGCAGTGCATCCGGGGCGTAGCCGAC  
TGATGGCCTCTAAGGACCCTATGAACGGTGCACGACG

>ITS.M06102\_C7F

GGAAGTAAAAGTCGTAAACAAGGTTTCCGTAGGTGAACCTGCGGAAGGATCATTGTTCGTGA  
CCCTGACCAAATAGACCGCGCACGCGTAATCCAGCCTGCCGGCGATGGCACCGTCCGTC  
GCTCGGCCAAGTCTTCGACAACCTCATCTCCTCGGAGTGGGGCTCGGGGTAAAAGAACC  
ACGACGCCTAAGGCGTCAAGGAACACTGTGCCTAGCCCGGGGACGCGGACGGCTTGCTGG  
CCGCTCCCCGTGCTGCAATGCTATTTAATCCACACGACTCTCGGCAACGGATATCTCGGC  
TCTCGCATCGATGAAGAACGTAGCGAAATGCGATACCTGGTGTGAATTGCAGAATCCCGC  
GAACCATCGAGTCTTTGAACGCAAGTTGCGCCCGAGGCCATTTCGGCTGAGGGCACGCCTG  
CCTGGGCGTCACGCAAAACACGCTCCCACCCCCTCATCGGGTAGCGGGACGCGGCATGTG  
GCCCCCGTAGCGCAAGCTGCGGTGGGCCGAAGATATGGCTGCCGGCGTATCGTGCCGGA  
CACAGCGCGTGGTGTAGCGACCTCGCTTTACTTACCGCAGTGCATCCGGGGCGTAGCCGAC  
GTGATGGCCTCCAAGGACCCTATGAACGGTGCACGACG

>ITS.M06102\_C8Frc\_rev

GGAAGTAAAAGTCGTAAACAAGGTTTCCGTAGGTGAACCTGCGGAAGGATCATTGTTCGTGA  
CCCTGACCAAATAGACCGCGCACGCGTAATCCAGCCTGCCGGCGATGGCACCGTCCGTC  
GCTCGGCCAAGTCTTCGACAACCTCATCTCCTCGGAGTGGGGCTCGGGGTAAAAGAACC  
ACGACGCCTAAGGCGTCAAGGAACACTGTGCCTAGCCCGGGGACGCGGACGGCTTGCTGG  
CCGCCCCCGTGCTGCAATGCTATTTAATCCACACGACTCTCGGCAACGGATATCTCGGC  
CTCGCATCGATGAAGAACGTAGCGAAATGCGATACCTGGTGTGAATTGCAGAATCCCGC  
AACCATTGAGTCTTTGAACGCAAGTTGCGCCCGAGGCCATTTCGGCTGAGGGCACGCCTGC  
CTGGGCGTCACGCAAAACACGCTCCCACCCCCTCATCGGGTAGCGGGACGCGGCATGTGG  
CCCCCGTAGCGCAAGCTGCGGTGGGCCGAAGATATGGCTGCCGGCGTATCGTGCCGGAC  
ACAGCGCGTGGTGTAGCGACCTCGCTTTACTTACCGCAGTGCATCCGGGGCGTAGCCGAC  
TGATGGCCTCCAAGGACCCTATGAACGGTGCACGACG
