# Supplementary material for: Pollen-mediated gene flow from transgenic perennial creeping bentgrass and hybridization at the landscape level
Source: PubMed Central journal article supplement (PMC5336273; doi:10.1371/journal.pone.0173308), 2017-03-03
Supplement: pone.0173308.s002.pdf [file pone.0173308.s002.pdf]

| Sample Name | GR  | matKdel | Acp32 | Acp26b | Acp30b | Acp28b | Acp31 | Acp27b | Acp23 | Acp18 | Acp24 | Acp22 | Acp19 | Acp12 | cpSSR | Observation       |
|-------------|-----|---------|-------|--------|--------|--------|-------|--------|-------|-------|-------|-------|-------|-------|-------|-------------------|
| 090         | Pos | 124     | 86    | 148    | 218    | 292    | 173   | 350    | 144   | 213   | 234   | 125   | 195   | 259   | CB    | established plant |
| 332         | Neg | 124     | 87    | 148    | 219    | 294    | 173   | 350    | 144   | 213   | 234   | 125   | 195   | 258   | CB    | established plant |
| 405         | Neg | 124     | 87    | 148    | 219    | 292    | 174   | 350    | 144   | 213   | 234   | 126   | 195   | 258   | CB    | established plant |
| M008A       | Neg | 124     | 87    | 149    | 219    | 293    | 173   | 350    | 144   | 213   | 234   | 125   | 195   | 258   | CB    | established plant |
| M06084      | Neg | 124     | 87    | 148    | 219    | 293    | 174   | 351    | 144   | 213   | 234   | 125   | ?     | 257   | CB    | established plant |
| M193        | Neg | n/a     | 86    | 148    | 218    | 292    | 173   | 350    | 144   | ?     | 234   | 125   | 195   | 259   | CB    | established plant |
| M397        | Neg | 124     | 87    | 149    | 219    | 293    | 173   | 350    | 144   | 213   | 234   | 125   | 195   | 258   | CB    | established plant |
| M543        | Pos | 124     | 86    | 148    | 218    | 292    | 173   | 350    | 144   | 213   | 234   | 125   | 195   | 259   | CB    | established plant |
| M627        | Pos | 124     | 86    | 148    | 218    | 292    | 173   | 350    | 144   | 213   | 234   | 125   | ?     | 259   | CB    | established plant |
| M647        | Pos | 124     | 86    | 148    | 218    | 292    | 173   | 350    | 144   | 213   | 234   | 125   | ?     | 259   | CB    | established plant |
| M820        | Pos | 124     | 86    | 148    | 218    | 292    | 173   | 350    | 144   | 213   | 234   | 125   | 195   | 259   | CB    | established plant |
| M06102      | Neg | n/a     | n/a   | n/a    | n/a    | n/a    | n/a   | n/a    | n/a   | n/a   | n/a   | n/a   | n/a   | n/a   | n/a   | established plant |
| 404         | Neg | 106     | 87    | 148    | 219    | 292    | 172   | 350    | 143   | ?     | 235   | 125   | 195   | 258   | RT    | established plant |
| 483         | Neg | 106     | 87    | 149    | 218    | 293    | 174   | 350    | 145   | 213   | 234   | 125   | 195   | 258   | RT    | established plant |
| 396_3RF     | Neg | 106     | 89    | 145    | 218    | 291    | 168   | 348    | 143   | 213   | 238   | 125   | ?     | 257   | RF    | established plant |
| 397_1RF     | Neg | 106     | 89    | 145    | 218    | 291    | 168   | 348    | 143   | 213   | 238   | 125   | ?     | 257   | RF    | established plant |
| 447_1RF     | Neg | 106     | 89    | 145    | 218    | 291    | 168   | 348    | 143   | 213   | 238   | 125   | ?     | 257   | RF    | established plant |
| 447_2RF     | Neg | 106     | 89    | 145    | 218    | 291    | 168   | 348    | 143   | 213   | 238   | 125   | ?     | 257   | RF    | established plant |
| 464_1RF     | Neg | 106     | 89    | 145    | 218    | 291    | 168   | 348    | 143   | 213   | 238   | 125   | ?     | 257   | RF    | established plant |
| 464_2RF     | Neg | 106     | 89    | 145    | 218    | 291    | 168   | 348    | 143   | 213   | 238   | 125   | ?     | 257   | RF    | established plant |
| 464_3RF     | Neg | 106     | 89    | 145    | 218    | 291    | 168   | 348    | 143   | 213   | 238   | 125   | ?     | 257   | RF    | established plant |
| M06107_2RF  | Neg | 106     | 89    | 145    | 218    | 291    | 168   | 348    | 143   | 213   | 238   | 125   | ?     | 257   | RF    | established plant |
| M898_1RF    | Neg | 106     | 89    | 145    | 218    | 291    | 168   | 348    | 143   | 213   | 238   | 125   | ?     | 257   | RF    | established plant |
| M898_2RF    | Neg | 106     | 89    | 145    | 218    | 291    | 168   | 348    | 143   | 213   | 238   | 125   | ?     | 257   | RF    | established plant |
| RFin268_1   | Neg | 106     | 89    | 145    | 218    | 291    | 168   | 348    | 143   | 213   | 238   | 125   | ?     | 257   | RF    | established plant |
| RFin447_2   | Neg | 106     | 89    | 145    | 218    | 291    | 168   | 348    | 143   | 213   | 238   | 125   | 195   | 257   | RF    | established plant |
| Bksp_1      | Neg | 124     | 86    | 148    | 218    | 292    | 173   | 350    | 144   | 213   | 234   | 125   | 195   | 259   | CB    | reference         |
| Bksp_11     | Neg | 124     | 87    | 149    | 220    | 293    | 172   | 349    | 144   | 213   | 235   | 125   | 195   | 258   | CB    | reference         |
| Bksp_12     | Neg | 124     | 87    | 149    | 220    | 293    | 172   | 349    | 144   | 213   | 235   | 125   | 195   | 258   | CB    | reference         |
| Bksp_13     | Neg | 124     | 87    | 149    | 220    | 293    | 172   | 349    | 144   | 213   | 235   | 125   | 195   | 258   | CB    | reference         |
| Bksp_14     | Neg | 124     | 87    | 149    | 219    | 293    | 173   | 350    | 144   | 213   | 234   | 125   | 195   | 258   | CB    | reference         |
| PalS_4      | Neg | 124     | 87    | 149    | 219    | 293    | 173   | 350    | 144   | 213   | 234   | 125   | 195   | 258   | CB    | reference         |
| PalS_7      | Neg | 124     | 87    | 148    | 219    | 292    | 174   | 350    | 144   | 213   | 234   | 126   | 195   | 258   | CB    | reference         |
| PenA4_1     | Neg | 124     | 87    | 148    | 219    | 294    | 173   | 350    | 143   | 213   | 234   | 125   | 195   | 258   | CB    | reference         |
| PenA4_2     | Neg | 124     | 87    | 148    | 219    | 294    | 173   | 350    | 144   | 213   | 234   | 125   | 195   | 258   | CB    | reference         |
| PenA4_3     | Neg | 124     | 87    | 148    | 219    | 294    | 173   | 350    | 144   | 213   | 234   | 125   | 195   | 258   | CB    | reference         |
| PenA4_4     | Neg | 124     | 87    | 148    | 219    | 294    | 173   | 350    | 144   | 213   | 234   | 125   | 195   | 258   | CB    | reference         |
| PenG2_1     | Neg | 124     | 86    | 148    | 218    | 292    | 173   | 350    | 144   | 213   | 234   | 125   | 195   | 259   | CB    | reference         |
| PenG2_2     | Neg | 124     | 86    | 148    | 218    | 292    | 173   | 350    | 144   | 213   | 234   | 125   | 195   | 259   | CB    | reference         |

|            |     |     |    |     |     |     |     |     |     |     |     |     |     |     |    |           |
|------------|-----|-----|----|-----|-----|-----|-----|-----|-----|-----|-----|-----|-----|-----|----|-----------|
| PenG2_3    | Neg | 124 | 87 | 148 | 219 | 294 | 173 | 350 | 144 | 213 | 234 | 125 | 195 | 258 | CB | reference |
| PenG2_4    | Neg | 124 | 87 | 148 | 219 | 294 | 173 | 350 | 144 | 213 | 234 | 125 | 195 | 258 | CB | reference |
| PenX_11    | Neg | 124 | 86 | 148 | 218 | 292 | 173 | 350 | 144 | 213 | 234 | 125 | 195 | 259 | CB | reference |
| PenX_12    | Neg | 124 | 87 | 148 | 219 | 294 | 173 | 350 | 144 | 213 | 234 | 125 | 195 | 258 | CB | reference |
| PenX_13    | Neg | 124 | 86 | 148 | 218 | 292 | 173 | 350 | 144 | 213 | 234 | 125 | 195 | 259 | CB | reference |
| PenX_14    | Neg | 124 | 86 | 148 | 218 | 292 | 173 | 350 | 144 | 213 | 234 | 125 | 195 | 259 | CB | reference |
| PenX_17    | Neg | 124 | 86 | 148 | 218 | 292 | 173 | 350 | 144 | 213 | 234 | 125 | 195 | 259 | CB | reference |
| PenX_18    | Neg | 124 | 86 | 148 | 218 | 292 | 173 | 350 | 144 | 213 | 234 | 125 | 195 | 259 | CB | reference |
| PenX_2     | Neg | 124 | 86 | 148 | 218 | 292 | 173 | 350 | 144 | 213 | 234 | 125 | 195 | 259 | CB | reference |
| PenX_3     | Neg | 124 | 87 | 148 | 219 | 294 | 173 | 350 | 144 | 213 | 234 | 125 | 195 | 258 | CB | reference |
| Cemtry_6RT | Neg | 106 | 87 | 149 | 218 | 293 | 174 | 350 | 145 | 213 | 234 | 125 | 195 | 258 | RT | reference |
| Cemtry_7RT | Neg | 106 | 87 | 149 | 218 | 293 | 174 | 350 | 145 | 213 | 234 | 125 | 195 | 258 | RT | reference |
| Cemtry_8RT | Neg | 106 | 88 | 145 | 218 | 292 | 193 | 348 | 142 | 213 | 233 | 126 | 195 | 258 | RT | reference |
| gigS_1     | Neg | 106 | 88 | 145 | 218 | 292 | 193 | 348 | 142 | 213 | 233 | 126 | 193 | 258 | RT | reference |
| gigS_2     | Neg | 106 | 87 | 148 | 219 | 292 | 172 | 350 | 143 | 214 | 235 | 125 | 195 | 258 | RT | reference |
| gigS_3     | Neg | 106 | 88 | 145 | 218 | 292 | 193 | 348 | 142 | 213 | 233 | 126 | 193 | 258 | RT | reference |
| gigS_4     | Neg | 106 | 87 | 148 | 219 | 292 | 172 | 350 | 143 | 214 | 235 | 125 | 195 | 258 | RT | reference |
| gigS_5     | Neg | n/a | 88 | 145 | 218 | 292 | 193 | 348 | 142 | 213 | ?   | 126 | ?   | 258 | RT | reference |
| gigS_6     | Neg | 106 | 87 | 149 | 218 | 293 | 174 | 350 | 145 | 213 | 234 | 125 | 195 | 258 | RT | reference |
| gigS_7     | Neg | 106 | 87 | 149 | 218 | 293 | 174 | 350 | 145 | 213 | 234 | 125 | 195 | 258 | RT | reference |
| gigS_8     | Neg | 106 | 87 | 149 | 219 | 292 | 173 | 350 | 143 | 213 | 235 | 125 | 195 | 258 | RT | reference |
| gigS_8_2   | Neg | 106 | 87 | 149 | 219 | 292 | 173 | 350 | 143 | 213 | 235 | 125 | 195 | 258 | RT | reference |
| Reton_1    | Neg | 106 | 87 | 148 | 219 | 292 | 172 | 350 | 143 | 214 | 235 | 125 | 195 | 258 | RT | reference |
| Reton_2    | Neg | 106 | 87 | 148 | 219 | 292 | 172 | 350 | 143 | 214 | 235 | 125 | 195 | 258 | RT | reference |
| Straker_1  | Neg | 106 | 88 | 145 | 218 | 298 | 193 | 348 | 142 | 213 | 233 | 126 | 193 | 258 | RT | reference |
| Svj5_1     | Neg | 106 | 88 | 145 | 218 | 293 | 193 | 348 | 142 | 213 | 234 | 125 | 194 | 258 | RT | reference |
| 12_6_1     | Pos | 124 | 87 | 149 | 219 | 293 | 173 | 350 | 144 | 213 | 234 | 125 | 195 | 258 | CB | seedling  |
| 12_6_2     | Pos | 124 | 86 | 148 | 218 | 292 | 173 | 350 | 144 | 213 | 234 | 125 | 195 | 259 | CB | seedling  |
| 12_6_3     | Pos | 124 | 86 | 148 | 218 | 292 | 173 | 350 | 144 | 213 | 234 | 125 | 195 | 259 | CB | seedling  |
| 12_6_4     | Pos | 124 | 86 | 148 | 218 | 292 | 173 | 350 | 144 | 213 | 234 | 125 | 195 | 258 | CB | seedling  |
| 12_6_5     | Pos | 124 | 86 | 148 | 218 | 292 | 173 | 350 | 144 | 213 | 234 | 125 | 195 | 259 | CB | seedling  |
| 12_8_2     | Pos | 124 | 87 | 149 | 219 | 293 | 173 | 350 | 144 | 213 | 235 | 125 | 195 | 258 | CB | seedling  |
| 12_8_3     | Pos | 124 | 86 | 148 | 218 | 292 | 173 | 350 | 144 | 213 | 234 | 125 | 195 | 258 | CB | seedling  |
| 13_3_1     | Pos | 124 | 87 | 149 | 219 | 293 | 173 | 350 | 144 | 213 | 234 | 125 | 195 | 258 | CB | seedling  |
| 13_3_2     | Pos | 124 | 87 | 149 | 219 | 293 | 173 | 350 | 144 | 213 | 234 | 125 | 195 | 258 | CB | seedling  |
| 13_4_1     | Pos | 124 | 87 | 149 | 219 | 293 | 173 | 350 | 144 | 213 | 234 | 125 | 195 | 258 | CB | seedling  |
| 13_4_2     | Pos | 124 | 87 | 149 | 219 | 293 | 173 | 350 | 144 | 213 | 234 | 125 | 195 | 258 | CB | seedling  |
| 13_4_3     | Pos | 124 | 87 | 149 | 219 | 293 | 173 | 350 | 144 | 213 | 234 | 125 | 195 | 258 | CB | seedling  |
| 13_4_4     | Pos | 124 | 87 | 149 | 219 | 292 | 174 | 350 | 144 | 213 | 234 | 125 | 195 | 258 | CB | seedling  |
| 13_6_1     | Pos | 124 | 87 | 149 | 219 | 294 | 174 | 351 | 144 | 213 | 234 | 125 | 195 | 258 | CB | seedling  |

|         |     |     |    |     |     |     |     |     |     |     |     |     |     |     |    |          |
|---------|-----|-----|----|-----|-----|-----|-----|-----|-----|-----|-----|-----|-----|-----|----|----------|
| 15_1    | Pos | 124 | 86 | 148 | 218 | 292 | 173 | 350 | 144 | 213 | 234 | 125 | 195 | 259 | CB | seedling |
| 16_1    | Pos | 124 | 87 | 149 | 219 | 293 | 173 | 350 | 144 | 213 | 234 | 125 | 195 | 258 | CB | seedling |
| 16_15   | Pos | 124 | 87 | 149 | 219 | 293 | 173 | 350 | 144 | 213 | 234 | 125 | 195 | 258 | CB | seedling |
| 16_22   | Pos | 124 | 87 | 149 | 219 | 293 | 173 | 350 | 144 | 213 | 234 | 125 | 195 | 258 | CB | seedling |
| 16_25   | Pos | 124 | 87 | 149 | 219 | 293 | 173 | 350 | 144 | 213 | 234 | 125 | 195 | 258 | CB | seedling |
| 16_4    | Pos | 124 | 87 | 149 | 219 | 293 | 173 | 350 | 144 | 213 | 234 | 125 | 195 | 258 | CB | seedling |
| 16_5    | Pos | 124 | 87 | 149 | 219 | 293 | 173 | 350 | 144 | 213 | 234 | 125 | 195 | 258 | CB | seedling |
| 16_6    | Pos | 124 | 87 | 149 | 219 | 293 | 173 | 350 | 144 | 213 | 234 | 125 | 195 | 258 | CB | seedling |
| 16_7    | Pos | 124 | 87 | 149 | 219 | 293 | 173 | 350 | 144 | 213 | 234 | 125 | 195 | 258 | CB | seedling |
| 16_8    | Pos | 124 | 87 | 149 | 219 | 293 | 173 | 350 | 144 | 213 | 234 | 125 | 195 | 258 | CB | seedling |
| 201_1   | Pos | 124 | 86 | 148 | 218 | 292 | 173 | 350 | 144 | 213 | 234 | 125 | 195 | 259 | CB | seedling |
| 201_2   | Pos | 124 | 86 | 148 | 218 | 292 | 173 | 350 | 144 | 213 | 234 | 125 | ?   | 259 | CB | seedling |
| 201_3   | Pos | 124 | 86 | 148 | 218 | 292 | 173 | 350 | 144 | 213 | 234 | 125 | 195 | 259 | CB | seedling |
| 201_4   | Pos | 124 | 86 | 148 | 218 | 292 | 173 | 350 | 144 | 213 | 234 | 125 | 195 | 259 | CB | seedling |
| 201_5   | Pos | 124 | 86 | 148 | 218 | 292 | 173 | 350 | 144 | 213 | 234 | 125 | 195 | 259 | CB | seedling |
| 201_8   | Pos | 124 | 86 | 148 | 218 | 292 | 173 | 350 | 144 | 213 | 234 | 125 | 195 | 259 | CB | seedling |
| 332_1   | Pos | 124 | 87 | 148 | 219 | 294 | 173 | 350 | 144 | 213 | 234 | 125 | 195 | 258 | CB | seedling |
| 405_1   | Pos | 124 | 87 | 148 | 219 | 292 | 174 | 350 | 144 | 213 | 234 | 126 | 195 | 258 | CB | seedling |
| 405_2   | Pos | 124 | 87 | 148 | 219 | 292 | 174 | 350 | 144 | 213 | 234 | 126 | 195 | 258 | CB | seedling |
| 405_3   | Pos | 124 | 87 | 148 | 219 | 292 | 174 | 350 | 144 | 213 | 234 | 126 | 195 | 258 | CB | seedling |
| 405_4   | Pos | 124 | 87 | 148 | 219 | 292 | 174 | 350 | 144 | 213 | 234 | 126 | 195 | 258 | CB | seedling |
| 74_2_1  | Pos | 124 | 87 | 149 | 219 | 293 | 173 | 350 | 144 | 213 | 234 | 125 | 195 | 258 | CB | seedling |
| 74_2_2  | Pos | 124 | 87 | 149 | 219 | 293 | 173 | 350 | 144 | 213 | 234 | 125 | 195 | 258 | CB | seedling |
| M008_1  | Pos | 124 | 87 | 149 | 219 | 293 | 173 | 350 | 144 | 213 | 234 | 125 | 195 | 258 | CB | seedling |
| M008_2  | Pos | 124 | 87 | 149 | 219 | 293 | 173 | 350 | 144 | 213 | 234 | 125 | 195 | 258 | CB | seedling |
| M008_3  | Pos | 124 | 87 | 149 | 219 | 293 | 173 | 350 | 144 | 213 | 234 | 125 | 195 | 258 | CB | seedling |
| M008_4  | Pos | 124 | 87 | 149 | 219 | 293 | 173 | 350 | 144 | 213 | 234 | 125 | 195 | 258 | CB | seedling |
| M008_5  | Pos | n/a | 87 | 149 | 219 | 293 | 173 | 350 | 144 | 213 | 234 | 125 | 195 | 258 | CB | seedling |
| M193_1  | Pos | 124 | 86 | 148 | 218 | 292 | 173 | 350 | 144 | 213 | ?   | 125 | 195 | 259 | CB | seedling |
| M193_2  | Pos | 124 | 85 | 148 | 218 | 292 | 173 | 350 | 144 | 213 | 234 | 125 | 195 | 259 | CB | seedling |
| M193_4  | Pos | 124 | 86 | 148 | 218 | 292 | 173 | 350 | 144 | 213 | 234 | 125 | 195 | 259 | CB | seedling |
| M193_5  | Pos | 124 | 86 | 148 | 218 | 292 | 173 | 350 | 144 | 213 | 234 | 125 | 195 | 259 | CB | seedling |
| M193_6  | Pos | 124 | 86 | 148 | 218 | 292 | 173 | 350 | 144 | 213 | 234 | 125 | 195 | 259 | CB | seedling |
| M397_1  | Pos | 124 | 87 | 149 | 219 | 293 | 173 | 350 | 144 | 213 | 234 | 125 | 195 | 258 | CB | seedling |
| M397_2  | Pos | 124 | 87 | 149 | 219 | 293 | 173 | 350 | 144 | 213 | 234 | 125 | 195 | 258 | CB | seedling |
| M397_3  | Pos | 124 | 87 | 149 | 219 | 293 | 173 | 350 | 144 | 213 | 234 | 125 | 195 | 258 | CB | seedling |
| M397_4  | Pos | n/a | 87 | 149 | 219 | 293 | 173 | 350 | 144 | 213 | 234 | 125 | 195 | 258 | CB | seedling |
| 17_10_1 | Pos | 106 | 87 | 149 | 218 | 293 | 174 | 350 | 145 | 213 | 234 | 125 | 195 | 258 | RT | seedling |
| 17_10_2 | Pos | 106 | 87 | 149 | 218 | 293 | 174 | 350 | 145 | 213 | 234 | 125 | 195 | 258 | RT | seedling |
| 17_10_3 | Pos | n/a | 87 | 149 | 218 | 293 | 174 | 350 | 145 | 213 | 234 | 125 | 195 | 258 | RT | seedling |

|         |     |     |    |     |     |     |     |     |     |     |     |     |     |     |    |          |
|---------|-----|-----|----|-----|-----|-----|-----|-----|-----|-----|-----|-----|-----|-----|----|----------|
| 17_10_4 | Pos | 106 | 87 | 149 | 218 | 293 | 174 | 350 | 145 | 213 | 234 | 125 | 195 | 258 | RT | seedling |
| 17_10_5 | Pos | 106 | 87 | 149 | 218 | 293 | 174 | 350 | 145 | 213 | 234 | 125 | 195 | 258 | RT | seedling |
| 17_10_9 | Pos | 106 | 87 | 149 | 218 | 293 | 174 | 350 | 145 | 213 | 234 | 125 | 195 | 258 | RT | seedling |
| 404_1   | Pos | 106 | 87 | 148 | 219 | 292 | 172 | 350 | 143 | 214 | 235 | 125 | 195 | 258 | RT | seedling |
| 404_1   | Pos | 106 | 87 | 148 | 219 | 292 | 172 | 350 | 143 | 214 | 235 | 125 | 195 | 258 | RT | seedling |
| 48_6_1  | Pos | 106 | 88 | 145 | 218 | 292 | 193 | 348 | 142 | 213 | ?   | 126 | 195 | 258 | RT | seedling |
| 48_6_2  | Pos | 106 | 88 | 145 | 218 | 292 | 193 | 348 | 142 | 213 | ?   | 126 | ?   | 258 | RT | seedling |
| 48_6_3  | Pos | 106 | 88 | 145 | 218 | 292 | 193 | 348 | 142 | 213 | ?   | 126 | ?   | 258 | RT | seedling |
| 48_6_4  | Pos | 106 | 88 | 145 | 218 | 292 | 193 | 348 | 142 | 213 | ?   | 126 | ?   | 258 | RT | seedling |
| 483_1   | Pos | 106 | 87 | 149 | 218 | 293 | 174 | 350 | 145 | 213 | 234 | 125 | 195 | 258 | RT | seedling |
| 49_1_1  | Pos | 106 | 88 | 145 | 218 | 292 | 193 | 348 | 142 | 213 | ?   | 126 | 193 | 258 | RT | seedling |
| 49_1_2  | Pos | 106 | 88 | 145 | 218 | 292 | 193 | 348 | 142 | 213 | ?   | 126 | ?   | 258 | RT | seedling |
| 49_3_1  | Pos | 106 | 88 | 145 | 218 | 292 | 193 | 348 | 142 | 213 | ?   | 126 | ?   | 258 | RT | seedling |
| 49_6_1  | Pos | 106 | 88 | 145 | 218 | 292 | 193 | 348 | 142 | 213 | ?   | 126 | ?   | 258 | RT | seedling |
| 49_6_2  | Pos | 106 | 88 | 145 | 218 | 292 | 193 | 348 | 142 | 213 | ?   | 126 | ?   | 258 | RT | seedling |
| 49_6_2  | Pos | 106 | 88 | 145 | 218 | 292 | 193 | 348 | 142 | 213 | ?   | 126 | ?   | 258 | RT | seedling |
| 49_6_3  | Pos | 106 | 88 | 145 | 218 | 292 | 193 | 348 | 142 | 213 | ?   | 126 | ?   | 258 | RT | seedling |
| 49_7_4  | Pos | 106 | 88 | 145 | 218 | 292 | 193 | 348 | 142 | 213 | ?   | 126 | ?   | 258 | RT | seedling |
| 49_7_5  | Pos | 106 | 88 | 145 | 218 | 292 | 193 | 348 | 142 | 213 | ?   | 126 | ?   | 258 | RT | seedling |
| 49_7_7  | Pos | 106 | 88 | 145 | 218 | 292 | 193 | 348 | 142 | 213 | ?   | 126 | ?   | 258 | RT | seedling |
| 49_7_9  | Pos | 106 | 88 | 145 | 218 | 292 | 193 | 348 | 142 | 213 | ?   | 126 | ?   | 258 | RT | seedling |
| 74_1_1  | Pos | 106 | 87 | 149 | 218 | 293 | 174 | 350 | 145 | 213 | 234 | 125 | 195 | 258 | RT | seedling |
| 74_1_2  | Pos | 106 | 87 | 149 | 218 | 293 | 174 | 350 | 145 | 213 | 234 | 125 | 195 | 258 | RT | seedling |
| 83_3_1  | Pos | 106 | 87 | 148 | 219 | 292 | 172 | 350 | 143 | 214 | 235 | 125 | 195 | 258 | RT | seedling |
| 83_3_2  | Pos | 106 | 87 | 148 | 219 | 292 | 172 | 350 | 143 | 214 | 235 | 125 | 195 | 258 | RT | seedling |
| 83_3_3  | Pos | 106 | 87 | 148 | 219 | 292 | 172 | 350 | 143 | 214 | ?   | 125 | 195 | 258 | RT | seedling |
